# Supplementary material for: Real-Time Classification of Causes of Death Using AI: Sensitivity Analysis
Source: PubMed Central journal article supplement (PMC11041420; doi:10.2196/40965), 2023-11-22
Supplement: ai_v2i1e40965_app1.pdf [file ai_v2i1e40965_app1.pdf]

## **Supplementary Material**

### **Real-Time Classification of Causes of Death Using AI: Sensitivity Analysis**

#### Authors:

Patrícia Pita Ferreira<sup>1,2,3</sup>, MD; Diogo Godinho Simões<sup>1,4</sup>, MD; Constança Pinto de Carvalho<sup>1,5</sup>, MD; Francisco Duarte<sup>6</sup>; Eugénia Fernandes<sup>1</sup>, PhD; Pedro Casaca<sup>1</sup>, MD; José Loff<sup>7</sup>, MSc; Ana Paula Soares<sup>1</sup>, MPH; Maria João Albuquerque<sup>1</sup>, BSc; Pedro Pinto-Leite<sup>1</sup>, MD; André Peralta-Santos<sup>1,8,9</sup>, MD, MPH, PhD

<sup>1</sup> Direção de Serviços de Informação e Análise, Direção-Geral da Saúde, Lisbon, Portugal

<sup>2</sup> Unidade de Saúde Pública Zé Povinho, Agrupamento de Centros de Saúde do Oeste Norte, Administração Regional de Saúde de Lisboa e Vale do Tejo, Caldas da Rainha, Portugal

<sup>3</sup> NOVA National School of Public Health, Universidade NOVA de Lisboa, Lisbon, Portugal

<sup>4</sup> Unidade de Saúde Pública Higeia, Agrupamento de Centros de Saúde de Almada-Seixal, Administração Regional de Saúde de Lisboa e Vale do Tejo, Almada, Portugal

<sup>5</sup> Unidade de Saúde Pública do Litoral Alentejano, Unidade Local de Saúde do Litoral Alentejano, Administração Regional de Saúde do Alentejo, Santiago do Cacém, Portugal

<sup>6</sup> Lisbon, Portugal

<sup>7</sup> phiStat – Statistical Consulting, Lisbon, Portugal

<sup>8</sup> NOVA National School of Public Health, Public Health Research Centre, Universidade NOVA de Lisboa, Lisbon, Portugal

<sup>9</sup> Comprehensive Health Research Centre, Universidade NOVA de Lisboa, Lisbon, Portugal

Address for correspondence: [ppita.ferreira@gmail.com](mailto:ppita.ferreira@gmail.com)

## Contents

|                                                                                                            |    |
|------------------------------------------------------------------------------------------------------------|----|
| Functions.....                                                                                             | 3  |
| Function to implement Westegard [17] rules for the definition of excess mortality periods .....            | 3  |
| Function to implement Westegard rules for the definition of severe excess mortality periods (>4 SDs) ..... | 4  |
| Function to implement Westegard rules for the definition of extreme excess mortality periods (>6 SDs)..... | 5  |
| Formula to calculate the weighted-average of performance metrics.....                                      | 6  |
| Performance metrics for classification algorithms .....                                                    | 7  |
| ICD-10 chapter analysis .....                                                                              | 8  |
| Performance metrics – global overview .....                                                                | 8  |
| All periods.....                                                                                           | 9  |
| Periods of excess mortality .....                                                                          | 17 |
| Periods without excess mortality.....                                                                      | 23 |
| Periods with severe excess mortality (>4 SDs) .....                                                        | 29 |
| Periods with extreme excess mortality (>6 SDs).....                                                        | 32 |
| Difference between excess mortality periods and periods without excess mortality .....                     | 35 |
| ICD-10 block analysis.....                                                                                 | 41 |
| Performance metrics – global overview .....                                                                | 41 |
| All periods.....                                                                                           | 43 |
| Periods of excess mortality .....                                                                          | 50 |
| Periods without excess mortality.....                                                                      | 53 |
| Periods with severe excess mortality (>4 SDs) .....                                                        | 56 |
| Periods with extreme excess mortality (>6 SDs).....                                                        | 59 |
| Difference between excess mortality periods and periods without excess mortality .....                     | 61 |

# Supplementary Material

## Functions

### Function to implement Westgard [17] rules for the definition of excess mortality periods

```
f.westgard <- function(z) {  
  a95 <- z > qnorm(1 - 0.05/2)  
  a99 <- z > qnorm(1 - 0.01/2)  
  turn_on <- a99 | (a95 & c(tail(a95, -1), NA)) | (a95 & c(FALSE, head(a95, -1)))  
  turn_off <- (!a95 & !c(tail(a95, -1), NA)) | (!a95 & !c(NA, head(a95, -1)))  
  
  state <- logical(length(turn_on))  
  state[1] <- turn_on[1]  
  for (i in 2:(length(state))) {  
    if (is.na(turn_on[i]) | is.na(turn_off[i])) {  
      state[i] <- NA  
    } else if (state[i - 1] & turn_off[i]) {  
      state[i] <- FALSE  
    } else if ( !state[i - 1] & turn_on[i]) {  
      state[i] <- TRUE  
    } else {  
      state[i] <- state[i - 1]  
    }  
  }  
  return(state)  
}
```

**Whereas  $z$  is the z-score.**

### Function to implement Westgard rules for the definition of severe excess mortality periods (>4 SDs)

```
f.westgard <- function(z) {  
  plus4 <- z > 4  
  turn_on <- (plus4 & c(tail(plus4, -1), NA)) | (plus4 & c(FALSE, head(plus4, -1)))  
  turn_off <- (!plus4 & !c(tail(plus4, -1), NA)) | (!plus4 & !c(NA, head(plus4, -1)))  
  
  state <- logical(length(turn_on))  
  state[1] <- turn_on[1]  
  for (i in 2:(length(state))) {  
    if (is.na(turn_on[i]) | is.na(turn_off[i])) {  
      state[i] <- NA  
    } else if (state[i - 1] & turn_off[i]) {  
      state[i] <- FALSE  
    } else if ( !state[i - 1] & turn_on[i]) {  
      state[i] <- TRUE  
    } else {  
      state[i] <- state[i - 1]  
    }  
  }  
  return(state)  
}
```

Whereas  $z$  is the z-score.

### Function to implement Westgard rules for the definition of extreme excess mortality periods (>6 SDs)

```
f.westgard <- function(z) {  
  plus6 <- z > 6  
  turn_on <- (plus6 & c(tail(plus6, -1), NA)) | (plus6 & c(FALSE, head(plus6, -1)))  
  turn_off <- (!plus6 & !c(tail(plus6, -1), NA)) | (!plus6 & !c(NA, head(plus6, -1)))  
  
  state <- logical(length(turn_on))  
  state[1] <- turn_on[1]  
  for (i in 2:(length(state))) {  
    if (is.na(turn_on[i]) | is.na(turn_off[i])) {  
      state[i] <- NA  
    } else if (state[i - 1] & turn_off[i]) {  
      state[i] <- FALSE  
    } else if ( !state[i - 1] & turn_on[i]) {  
      state[i] <- TRUE  
    } else {  
      state[i] <- state[i - 1]  
    }  
  }  
  return(state)  
}
```

Whereas  $z$  is the z-score.

### Formula to calculate the weighted-average of performance metrics

$$\sum_{i=1}^N \mathbf{PF}_{class\ i} \times \mathbf{W}_{class\ i}$$

Where **PF** stands for the performance metric for each of the classes evaluated;  
**class** stands either for the ICD-10 chapters or ICD-10 blocks;

And **W** stands for the number of true labels of each class, in our case, it stands for the **detection prevalence** calculated by the package “caret” [18, 19]

## Performance metrics for classification algorithms

Supplementary Table 1 - Performance metrics calculated by the "confusionMatrix" function of the "caret" package

|                                                                                                                                                          |          | Human Coders (GOLD-STANDARD)                     |                                                             |
|----------------------------------------------------------------------------------------------------------------------------------------------------------|----------|--------------------------------------------------|-------------------------------------------------------------|
|                                                                                                                                                          |          | Event                                            | No Event                                                    |
| AUTOCOD                                                                                                                                                  | Event    | True Positives (TP)                              | False Positives (FP)                                        |
|                                                                                                                                                          | No Event | False Negatives (FN)                             | True Negatives (TN)                                         |
|                                                                                                                                                          |          | Sensitivity / Rate of TP<br>$\frac{TP}{TP + FN}$ | Specificity<br>$\frac{TN}{TN + FP}$                         |
| Prevalence<br>$\frac{TP + FN}{TP + FP + FN + TN}$                                                                                                        |          |                                                  |                                                             |
| Positive Predictive Value<br>$\frac{sensitivity \times prevalence}{((sensitivity \times prevalence) + (1 - specificity) \times (1 - prevalence))}$       |          |                                                  |                                                             |
| Negative Predictive Value<br>$\frac{specificity \times (1 - prevalence)}{((1 - sensitivity) \times prevalence) + (specificity) \times (1 - prevalence)}$ |          |                                                  |                                                             |
| Balanced Accuracy<br>$(sensitivity + specificity)/2$                                                                                                     |          |                                                  |                                                             |
|                                                                                                                                                          |          | Detection Rate<br>$\frac{TP}{TP + FN + FP + TN}$ | Detection Prevalence<br>$\frac{TP + FP}{TP + FN + FP + TN}$ |
|                                                                                                                                                          |          | Precision<br>$\frac{TP}{TP + FP}$                | Recall<br>$\frac{TP}{TP + FN}$                              |
| F1-Score<br>$\frac{(1 + \beta^2) \times precision \times recall}{(\beta^2 \times precision) + recall}$                                                   |          |                                                  |                                                             |

## ICD-10 chapter analysis

### Performance metrics – global overview

Supplementary Table 2 - Performance Metrics of AUTOCOD, by chapter, for all the periods analyzed

|     | I           |              |             |              | II          |              |             |              | III         |              |             |              | IV          |              |             |              | V           |              |             |              |
|-----|-------------|--------------|-------------|--------------|-------------|--------------|-------------|--------------|-------------|--------------|-------------|--------------|-------------|--------------|-------------|--------------|-------------|--------------|-------------|--------------|
|     | No Excess   | Excess Mort. | Severe >4SD | Extreme >6SD | No Excess   | Excess Mort. | Severe >4SD | Extreme >6SD | No Excess   | Excess Mort. | Severe >4SD | Extreme >6SD | No Excess   | Excess Mort. | Severe >4SD | Extreme >6SD | No Excess   | Excess Mort. | Severe >4SD | Extreme >6SD |
| Sen | 0.67        | 0.67         | 0.67        | 0.65         | <b>0.95</b> | <b>0.95</b>  | <b>0.94</b> | <b>0.95</b>  | 0.57        | 0.55         | 0.58        | 0.41         | <b>0.81</b> | <b>0.81</b>  | <b>0.81</b> | <b>0.82</b>  | <b>0.77</b> | <b>0.78</b>  | <b>0.78</b> | <b>0.77</b>  |
| Spe | <b>0.99</b> | <b>0.99</b>  | <b>0.99</b> | <b>0.99</b>  | <b>0.99</b> | <b>0.99</b>  | <b>0.99</b> | <b>0.99</b>  | <b>1.00</b> | <b>1.00</b>  | <b>1.00</b> | <b>1.00</b>  | <b>0.98</b> | <b>0.98</b>  | <b>0.98</b> | <b>0.98</b>  | <b>0.99</b> | <b>0.99</b>  | <b>0.99</b> | <b>0.99</b>  |
| PPV | 0.61        | 0.64         | 0.65        | 0.62         | <b>0.98</b> | <b>0.97</b>  | <b>0.97</b> | <b>0.96</b>  | 0.46        | 0.51         | 0.53        | 0.36         | 0.69        | 0.69         | 0.69        | 0.69         | <b>0.82</b> | <b>0.80</b>  | <b>0.80</b> | <b>0.83</b>  |
| NPV | <b>0.99</b> | <b>0.99</b>  | <b>0.99</b> | <b>0.99</b>  | <b>0.98</b> | <b>0.98</b>  | <b>0.99</b> | <b>0.99</b>  | <b>1.00</b> | <b>1.00</b>  | <b>1.00</b> | <b>1.00</b>  | <b>0.99</b> | <b>0.99</b>  | <b>0.99</b> | <b>0.99</b>  | <b>0.99</b> | <b>0.99</b>  | <b>0.99</b> | <b>0.99</b>  |
| F1  | 0.64        | 0.65         | 0.66        | 0.63         | <b>0.96</b> | <b>0.96</b>  | <b>0.96</b> | <b>0.96</b>  | 0.51        | 0.53         | 0.55        | 0.38         | 0.74        | 0.74         | 0.74        | <b>0.75</b>  | <b>0.80</b> | <b>0.79</b>  | <b>0.79</b> | <b>0.80</b>  |
| Pre | 0.02        | 0.02         | 0.02        | 0.02         | 0.27        | 0.23         | 0.20        | 0.19         | 0.00        | 0.00         | 0.01        | 0.00         | 0.05        | 0.05         | 0.05        | 0.05         | 0.04        | 0.04         | 0.04        | 0.05         |
| DR  | 0.01        | 0.01         | 0.01        | 0.01         | 0.26        | 0.21         | 0.19        | 0.18         | 0.00        | 0.00         | 0.00        | 0.00         | 0.04        | 0.04         | 0.04        | 0.04         | 0.03        | 0.03         | 0.03        | 0.04         |
| DP  | 0.02        | 0.02         | 0.02        | 0.02         | 0.27        | 0.22         | 0.20        | 0.19         | 0.01        | 0.01         | 0.01        | 0.00         | 0.06        | 0.06         | 0.06        | 0.06         | 0.04        | 0.04         | 0.04        | 0.04         |
| BA  | <b>0.83</b> | <b>0.83</b>  | <b>0.83</b> | <b>0.82</b>  | <b>0.97</b> | <b>0.97</b>  | <b>0.97</b> | <b>0.97</b>  | <b>0.79</b> | <b>0.78</b>  | <b>0.79</b> | 0.70         | <b>0.89</b> | <b>0.90</b>  | <b>0.89</b> | <b>0.90</b>  | <b>0.88</b> | <b>0.89</b>  | <b>0.88</b> | <b>0.88</b>  |
|     | VI          |              |             |              | VII         |              |             |              | VIII        |              |             |              | IX          |              |             |              | X           |              |             |              |
|     | No Excess   | Excess Mort. | Severe >4SD | Extreme >6SD | No Excess   | Excess Mort. | Severe >4SD | Extreme >6SD | No Excess   | Excess Mort. | Severe >4SD | Extreme >6SD | No Excess   | Excess Mort. | Severe >4SD | Extreme >6SD | No Excess   | Excess Mort. | Severe >4SD | Extreme >6SD |
| Sen | <b>0.79</b> | <b>0.80</b>  | <b>0.79</b> | <b>0.79</b>  | 0.00        | 0.00         | NA          | NA           | 0.18        | 0.25         | 0.40        | NA           | <b>0.91</b> | <b>0.91</b>  | <b>0.91</b> | <b>0.91</b>  | <b>0.90</b> | <b>0.89</b>  | <b>0.90</b> | <b>0.89</b>  |
| Spe | <b>1.00</b> | <b>1.00</b>  | <b>1.00</b> | <b>1.00</b>  | <b>1.00</b> | <b>1.00</b>  | <b>1.00</b> | <b>1.00</b>  | <b>1.00</b> | <b>1.00</b>  | <b>1.00</b> | <b>1.00</b>  | <b>0.97</b> | <b>0.96</b>  | <b>0.96</b> | <b>0.96</b>  | <b>0.98</b> | <b>0.97</b>  | <b>0.97</b> | <b>0.97</b>  |
| PPV | <b>0.86</b> | <b>0.86</b>  | <b>0.85</b> | <b>0.88</b>  | NaN         | NaN          | NA          | NA           | 0.67        | 0.67         | 0.67        | NA           | <b>0.92</b> | <b>0.91</b>  | <b>0.91</b> | <b>0.90</b>  | <b>0.83</b> | <b>0.85</b>  | <b>0.86</b> | <b>0.86</b>  |
| NPV | <b>0.99</b> | <b>0.99</b>  | <b>0.99</b> | <b>0.99</b>  | <b>1.00</b> | <b>1.00</b>  | NA          | NA           | <b>1.00</b> | <b>1.00</b>  | <b>1.00</b> | NA           | <b>0.96</b> | <b>0.96</b>  | <b>0.96</b> | <b>0.96</b>  | <b>0.99</b> | <b>0.98</b>  | <b>0.98</b> | <b>0.98</b>  |
| F1  | <b>0.82</b> | <b>0.83</b>  | <b>0.82</b> | <b>0.83</b>  | NA          | NA           | NA          | NA           | 0.29        | 0.36         | 0.50        | NA           | <b>0.91</b> | <b>0.91</b>  | <b>0.91</b> | <b>0.91</b>  | <b>0.86</b> | <b>0.87</b>  | <b>0.88</b> | <b>0.88</b>  |
| Pre | 0.04        | 0.04         | 0.04        | 0.04         | 0.00        | 0.00         | 0.00        | 0.00         | 0.00        | 0.00         | 0.00        | 0.00         | 0.29        | 0.30         | 0.31        | 0.31         | 0.11        | 0.14         | 0.16        | 0.16         |
| DR  | 0.03        | 0.03         | 0.03        | 0.03         | 0.00        | 0.00         | 0.00        | 0.00         | 0.00        | 0.00         | 0.00        | 0.00         | 0.27        | 0.28         | 0.28        | 0.28         | 0.10        | 0.13         | 0.14        | 0.15         |
| DP  | 0.03        | 0.04         | 0.03        | 0.04         | 0.00        | 0.00         | 0.00        | 0.00         | 0.00        | 0.00         | 0.00        | 0.00         | 0.29        | 0.30         | 0.31        | 0.31         | 0.12        | 0.15         | 0.16        | 0.17         |
| BA  | <b>0.90</b> | <b>0.90</b>  | <b>0.89</b> | <b>0.89</b>  | 0.50        | 0.50         | NA          | NA           | 0.59        | 0.63         | 0.70        | NA           | <b>0.94</b> | <b>0.94</b>  | <b>0.93</b> | <b>0.94</b>  | <b>0.94</b> | <b>0.93</b>  | <b>0.93</b> | <b>0.93</b>  |
|     | XI          |              |             |              | XII         |              |             |              | XIII        |              |             |              | XIV         |              |             |              | XV          |              |             |              |
|     | No Excess   | Excess Mort. | Severe >4SD | Extreme >6SD | No Excess   | Excess Mort. | Severe >4SD | Extreme >6SD | No Excess   | Excess Mort. | Severe >4SD | Extreme >6SD | No Excess   | Excess Mort. | Severe >4SD | Extreme >6SD | No Excess   | Excess Mort. | Severe >4SD | Extreme >6SD |
| Sen | <b>0.80</b> | <b>0.79</b>  | <b>0.76</b> | <b>0.76</b>  | 0.28        | 0.35         | 0.40        | 0.20         | 0.42        | 0.42         | 0.42        | 0.32         | <b>0.76</b> | <b>0.76</b>  | <b>0.76</b> | 0.74         | 0.00        | 0.00         | 0.00        | 0.00         |
| Spe | <b>0.99</b> | <b>0.99</b>  | <b>0.99</b> | <b>1.00</b>  | <b>1.00</b> | <b>1.00</b>  | <b>1.00</b> | <b>1.00</b>  | <b>1.00</b> | <b>1.00</b>  | <b>1.00</b> | <b>1.00</b>  | <b>0.99</b> | <b>0.99</b>  | <b>0.99</b> | <b>0.99</b>  | <b>1.00</b> | <b>1.00</b>  | <b>1.00</b> | <b>1.00</b>  |
| PPV | <b>0.85</b> | <b>0.85</b>  | <b>0.83</b> | <b>0.85</b>  | 0.47        | 0.56         | 0.54        | 0.33         | 0.61        | 0.61         | 0.56        | 0.50         | <b>0.76</b> | 0.75         | <b>0.76</b> | <b>0.76</b>  | NaN         | NaN          | NA          | NA           |
| NPV | <b>0.99</b> | <b>0.99</b>  | <b>0.99</b> | <b>0.99</b>  | <b>1.00</b> | <b>1.00</b>  | <b>1.00</b> | <b>1.00</b>  | <b>1.00</b> | <b>1.00</b>  | <b>1.00</b> | <b>1.00</b>  | <b>0.99</b> | <b>0.99</b>  | <b>0.99</b> | <b>0.99</b>  | <b>1.00</b> | <b>1.00</b>  | <b>1.00</b> | <b>1.00</b>  |
| F1  | <b>0.83</b> | <b>0.82</b>  | <b>0.79</b> | <b>0.80</b>  | 0.35        | 0.43         | 0.46        | 0.25         | 0.49        | 0.50         | 0.48        | 0.39         | <b>0.76</b> | <b>0.75</b>  | <b>0.76</b> | <b>0.75</b>  | NA          | NA           | NA          | NA           |
| Pre | 0.05        | 0.04         | 0.04        | 0.04         | 0.00        | 0.00         | 0.00        | 0.00         | 0.00        | 0.00         | 0.00        | 0.00         | 0.03        | 0.03         | 0.03        | 0.03         | 0.00        | 0.00         | 0.00        | 0.00         |
| DR  | 0.04        | 0.03         | 0.03        | 0.03         | 0.00        | 0.00         | 0.00        | 0.00         | 0.00        | 0.00         | 0.00        | 0.00         | 0.02        | 0.02         | 0.02        | 0.02         | 0.00        | 0.00         | 0.00        | 0.00         |
| DP  | 0.04        | 0.04         | 0.04        | 0.03         | 0.00        | 0.00         | 0.00        | 0.00         | 0.00        | 0.00         | 0.00        | 0.00         | 0.03        | 0.03         | 0.03        | 0.03         | 0.00        | 0.00         | 0.00        | 0.00         |
| BA  | <b>0.90</b> | <b>0.89</b>  | <b>0.88</b> | <b>0.88</b>  | 0.64        | 0.68         | 0.70        | 0.60         | 0.71        | 0.71         | 0.71        | 0.66         | <b>0.88</b> | <b>0.87</b>  | <b>0.88</b> | <b>0.87</b>  | 0.50        | 0.50         | 0.50        | 0.50         |
|     | XVI         |              |             |              | XVII        |              |             |              | XVIII       |              |             |              | XIX         |              |             |              | XX          |              |             |              |
|     | No Excess   | Excess Mort. | Severe >4SD | Extreme >6SD | No Excess   | Excess Mort. | Severe >4SD | Extreme >6SD | No Excess   | Excess Mort. | Severe >4SD | Extreme >6SD | No Excess   | Excess Mort. | Severe >4SD | Extreme >6SD | No Excess   | Excess Mort. | Severe >4SD | Extreme >6SD |
| Sen | 0.07        | 0.00         | 0.00        | NA           | 0.39        | 0.34         | 0.32        | 0.20         | <b>0.93</b> | <b>0.93</b>  | <b>0.92</b> | <b>0.90</b>  | NA          | 0.00         | 0.00        | NA           | <b>0.79</b> | <b>0.76</b>  | 0.75        | 0.00         |
| Spe | <b>1.00</b> | <b>1.00</b>  | <b>1.00</b> | <b>1.00</b>  | <b>1.00</b> | <b>1.00</b>  | <b>1.00</b> | <b>1.00</b>  | <b>0.99</b> | <b>0.99</b>  | <b>0.99</b> | <b>0.99</b>  | NA          | <b>1.00</b>  | <b>1.00</b> | <b>1.00</b>  | <b>1.00</b> | <b>1.00</b>  | <b>1.00</b> | 0.00         |
| PPV | <b>1.00</b> | NaN          | NA          | NA           | <b>0.76</b> | 0.71         | 0.71        | 0.67         | <b>0.88</b> | <b>0.88</b>  | <b>0.88</b> | <b>0.88</b>  | NA          | NaN          | NA          | NA           | <b>0.88</b> | <b>0.88</b>  | <b>0.87</b> | 0.00         |
| NPV | <b>1.00</b> | <b>1.00</b>  | <b>1.00</b> | NA           | <b>1.00</b> | <b>1.00</b>  | <b>1.00</b> | <b>1.00</b>  | <b>1.00</b> | <b>1.00</b>  | <b>1.00</b> | <b>0.99</b>  | NA          | <b>1.00</b>  | <b>1.00</b> | NA           | <b>0.99</b> | <b>0.99</b>  | <b>0.99</b> | 0.00         |
| F1  | 0.12        | NA           | NA          | NA           | 0.51        | 0.46         | 0.44        | 0.31         | <b>0.90</b> | <b>0.90</b>  | <b>0.90</b> | <b>0.89</b>  | NA          | NA           | NA          | NA           | <b>0.83</b> | <b>0.82</b>  | <b>0.81</b> | 0.00         |
| Pre | 0.00        | 0.00         | 0.00        | 0.00         | 0.00        | 0.00         | 0.00        | 0.00         | 0.05        | 0.06         | 0.06        | 0.07         | NA          | 0.00         | 0.00        | 0.00         | 0.04        | 0.04         | 0.04        | 0.00         |
| DR  | 0.00        | 0.00         | 0.00        | 0.00         | 0.00        | 0.00         | 0.00        | 0.00         | 0.04        | 0.05         | 0.06        | 0.06         | NA          | 0.00         | 0.00        | 0.00         | 0.04        | 0.03         | 0.03        | 0.00         |
| DP  | 0.00        | 0.00         | 0.00        | 0.00         | 0.00        | 0.00         | 0.00        | 0.00         | 0.05        | 0.06         | 0.06        | 0.07         | NA          | 0.00         | 0.00        | 0.00         | 0.04        | 0.03         | 0.04        | 0.00         |
| BA  | 0.53        | 0.50         | 0.50        | NA           | 0.69        | 0.67         | 0.66        | 0.60         | <b>0.96</b> | <b>0.96</b>  | <b>0.96</b> | <b>0.94</b>  | NA          | 0.50         | 0.50        | NA           | <b>0.89</b> | <b>0.88</b>  | <b>0.87</b> | 0.00         |

Caption: Sen – Sensitivity; Spe – Specificity; PPV – Positive Predictive Value; NPV – Negative Predictive Value; F1 – F1-score; Pre – Prevalence; DR – Detection Rate; DP – Detection Prevalence; BA – Balanced Accuracy; I - Certain infectious and parasitic diseases; II - Neoplasms; III - Diseases of the blood and blood-forming organs and certain disorders involving the immune system; IV - Endocrine, nutritional and metabolic diseases; V - Mental and behavioural disorders; VI - Diseases of the nervous system; VII - Diseases of the eye and adnexa; VIII - Diseases of the ear and mastoid process; IX - Diseases of the circulatory system; X - Diseases of the respiratory system; XI - Diseases of the digestive system; XII - Diseases of the skin and subcutaneous tissue; XIII - Diseases of the musculoskeletal system and connective tissue; XIV - Diseases of the genitourinary system; XV - Pregnancy, childbirth and the puerperium; XVI - Certain conditions originating in the perinatal period; XVII - Congenital malformations, deformations and chromosomal abnormalities; XVIII - Symptoms, signs and abnormal clinical and laboratory findings, not elsewhere specified; XIX - Injury, poisoning and certain other consequences of external causes; XX - External causes of morbidity and mortality; NA – Missing values; NaN – not possible to calculate



Supplementary Table 3 - Average for performance metrics for different periods, for ICD-10's chapter classification of AUTOCOD

|                          |                 | Sensitivity | Specificity | Pos Pred Value | Neg Pred Value | F1 score | Prevalence | Detection Rate | Detection Prevalence | Balanced Accuracy |
|--------------------------|-----------------|-------------|-------------|----------------|----------------|----------|------------|----------------|----------------------|-------------------|
| <b>Weighted-averaged</b> | No Excess Mort. | 0.88        | 0.98        | 0.88           | 0.98           | 0.88     | 0.18       | 0.17           | 0.18                 | 0.93              |
|                          | Excess Mort.    | 0.88        | 0.98        | 0.88           | 0.98           | 0.88     | 0.18       | 0.16           | 0.18                 | 0.93              |
|                          | Severe >4 SD    | 0.87        | 0.98        | 0.87           | 0.98           | 0.87     | 0.18       | 0.16           | 0.18                 | 0.93              |
|                          | Extreme >6 SD   | 0.85        | 0.94        | 0.84           | 0.94           | 0.84     | 0.17       | 0.16           | 0.17                 | 0.89              |

All periods

Supplementary Table 4 – Distribution of death certificates in the dataset, according to source of classification

| Source         | N              | %             |
|----------------|----------------|---------------|
| <b>AUTOCOD</b> | 330 098        | 50.00         |
| <b>DGS</b>     | 330 098        | 50.00         |
| <b>Total</b>   | <b>660 196</b> | <b>100.00</b> |

Supplementary Table 5 - Distribution of death certificates in the dataset, according to ICD-10 chapter (descendent order)

| Chapter      | Chapter Description                                                                              | N              | %             |
|--------------|--------------------------------------------------------------------------------------------------|----------------|---------------|
| <b>IX</b>    | Diseases of the circulatory system                                                               | 97 420         | 29.51         |
| <b>II</b>    | Neoplasms                                                                                        | 85 837         | 26.00         |
| <b>X</b>     | Diseases of the respiratory system                                                               | 40 202         | 12.18         |
| <b>IV</b>    | Endocrine, nutritional and metabolic diseases                                                    | 16 430         | 4.98          |
| <b>XVIII</b> | Symptoms, signs and abnormal clinical and laboratory findings, not elsewhere specified           | 16 269         | 4.93          |
| <b>XI</b>    | Diseases of the digestive system                                                                 | 14 892         | 4.51          |
| <b>XX</b>    | External causes of morbidity and mortality                                                       | 14 128         | 4.28          |
| <b>V</b>     | Mental and behavioural disorders                                                                 | 12 742         | 3.86          |
| <b>VI</b>    | Diseases of the nervous system                                                                   | 11 810         | 3.58          |
| <b>XIV</b>   | Diseases of the genitourinary system                                                             | 10 277         | 3.11          |
| <b>I</b>     | Certain infectious and parasitic diseases                                                        | 6 156          | 1.86          |
| <b>XIII</b>  | Diseases of the musculoskeletal system and connective tissue                                     | 1 397          | 0.42          |
| <b>III</b>   | Diseases of the blood and blood-forming organs and certain disorders involving the immune system | 1 334          | 0.40          |
| <b>XII</b>   | Diseases of the skin and subcutaneous tissue                                                     | 583            | 0.18          |
| <b>XVII</b>  | Congenital malformations, deformations and chromosomal abnormalities                             | 494            | 0.15          |
| <b>XVI</b>   | Certain conditions originating in the perinatal period                                           | 58             | 0.02          |
| <b>XV</b>    | Pregnancy, childbirth and the puerperium                                                         | 35             | 0.01          |
| <b>VIII</b>  | Diseases of the ear and mastoid process                                                          | 30             | 0.01          |
| <b>VII</b>   | Diseases of the eye and adnexa                                                                   | 2              | 0.00          |
| <b>XIX</b>   | Injury, poisoning and certain other consequences of external causes                              | 2              | 0.00          |
| <b>Total</b> |                                                                                                  | <b>330 098</b> | <b>100.00</b> |

Supplementary Table 6 - Distribution of death certificates according to year of death

| Year of Death | N              | %            |
|---------------|----------------|--------------|
| <b>2016</b>   | 109 785        | 33.26        |
| <b>2017</b>   | 105 534        | 31.97        |
| <b>2018</b>   | 107 467        | 32.56        |
| <b>2019</b>   | 7 312          | 2.22         |
| <b>Total</b>  | <b>330 098</b> | <b>100.0</b> |

Supplementary Table 7 - Distribution of death certificates, according to year of death and ICD-10 chapter

| Year of death | Chapter | Chapter Description                                                                              | N      | %    |
|---------------|---------|--------------------------------------------------------------------------------------------------|--------|------|
| 2016          | IX      | Diseases of the circulatory system                                                               | 32 765 | 9.93 |
| 2018          | IX      | Diseases of the circulatory system                                                               | 31 262 | 9.47 |
| 2017          | IX      | Diseases of the circulatory system                                                               | 31 111 | 9.42 |
| 2018          | II      | Neoplasms                                                                                        | 28 293 | 8.57 |
| 2016          | II      | Neoplasms                                                                                        | 27 984 | 8.48 |
| 2017          | II      | Neoplasms                                                                                        | 27 869 | 8.44 |
| 2016          | X       | Diseases of the respiratory system                                                               | 13 470 | 4.08 |
| 2018          | X       | Diseases of the respiratory system                                                               | 13 114 | 3.97 |
| 2017          | X       | Diseases of the respiratory system                                                               | 12 653 | 3.83 |
| 2016          | XVIII   | Symptoms, signs and abnormal clinical and laboratory findings, not elsewhere specified           | 5 916  | 1.79 |
| 2016          | IV      | Endocrine, nutritional and metabolic diseases                                                    | 5 584  | 1.69 |
| 2018          | IV      | Endocrine, nutritional and metabolic diseases                                                    | 5 310  | 1.61 |
| 2017          | IV      | Endocrine, nutritional and metabolic diseases                                                    | 5 184  | 1.57 |
| 2017          | XVIII   | Symptoms, signs and abnormal clinical and laboratory findings, not elsewhere specified           | 5 060  | 1.53 |
| 2016          | XI      | Diseases of the digestive system                                                                 | 4 979  | 1.51 |
| 2018          | XVIII   | Symptoms, signs and abnormal clinical and laboratory findings, not elsewhere specified           | 4 943  | 1.50 |
| 2017          | XI      | Diseases of the digestive system                                                                 | 4 871  | 1.48 |
| 2016          | XX      | External causes of morbidity and mortality                                                       | 4 832  | 1.46 |
| 2018          | V       | Mental and behavioural disorders                                                                 | 4 737  | 1.44 |
| 2018          | XI      | Diseases of the digestive system                                                                 | 4 721  | 1.43 |
| 2017          | XX      | External causes of morbidity and mortality                                                       | 4 585  | 1.39 |
| 2018          | XX      | External causes of morbidity and mortality                                                       | 4 431  | 1.34 |
| 2018          | VI      | Diseases of the nervous system                                                                   | 3 969  | 1.20 |
| 2017          | V       | Mental and behavioural disorders                                                                 | 3 947  | 1.20 |
| 2016          | VI      | Diseases of the nervous system                                                                   | 3 841  | 1.16 |
| 2017          | VI      | Diseases of the nervous system                                                                   | 3 748  | 1.14 |
| 2016          | V       | Mental and behavioural disorders                                                                 | 3 688  | 1.12 |
| 2016          | XIV     | Diseases of the genitourinary system                                                             | 3 437  | 1.04 |
| 2018          | XIV     | Diseases of the genitourinary system                                                             | 3 334  | 1.01 |
| 2017          | XIV     | Diseases of the genitourinary system                                                             | 3 306  | 1.00 |
| 2019          | IX      | Diseases of the circulatory system                                                               | 2 282  | 0.69 |
| 2017          | I       | Certain infectious and parasitic diseases                                                        | 2 012  | 0.61 |
| 2018          | I       | Certain infectious and parasitic diseases                                                        | 2 007  | 0.61 |
| 2016          | I       | Certain infectious and parasitic diseases                                                        | 2 003  | 0.61 |
| 2019          | II      | Neoplasms                                                                                        | 1 691  | 0.51 |
| 2019          | X       | Diseases of the respiratory system                                                               | 965    | 0.29 |
| 2018          | XIII    | Diseases of the musculoskeletal system and connective tissue                                     | 479    | 0.15 |
| 2016          | XIII    | Diseases of the musculoskeletal system and connective tissue                                     | 458    | 0.14 |
| 2017          | III     | Diseases of the blood and blood-forming organs and certain disorders involving the immune system | 452    | 0.14 |
| 2016          | III     | Diseases of the blood and blood-forming organs and certain disorders involving the immune system | 438    | 0.13 |
| 2017          | XIII    | Diseases of the musculoskeletal system and connective tissue                                     | 426    | 0.13 |
| 2018          | III     | Diseases of the blood and blood-forming organs and certain disorders involving the immune system | 417    | 0.13 |
| 2019          | V       | Mental and behavioural disorders                                                                 | 370    | 0.11 |

Supplementary Table 8 - Distribution of death certificates, according to year of death and ICD-10 chapter (cont.)

| Year of death | Chapter | Chapter Description                                                                              | N              | %             |
|---------------|---------|--------------------------------------------------------------------------------------------------|----------------|---------------|
| 2019          | IV      | Endocrine, nutritional and metabolic diseases                                                    | 352            | 0.11          |
| 2019          | XVIII   | Symptoms, signs and abnormal clinical and laboratory findings, not elsewhere specified           | 350            | 0.11          |
| 2019          | XI      | Diseases of the digestive system                                                                 | 321            | 0.10          |
| 2019          | XX      | External causes of morbidity and mortality                                                       | 280            | 0.08          |
| 2019          | VI      | Diseases of the nervous system                                                                   | 252            | 0.08          |
| 2018          | XII     | Diseases of the skin and subcutaneous tissue                                                     | 214            | 0.06          |
| 2016          | XII     | Diseases of the skin and subcutaneous tissue                                                     | 209            | 0.06          |
| 2019          | XIV     | Diseases of the genitourinary system                                                             | 200            | 0.06          |
| 2018          | XVII    | Congenital malformations, deformations and chromosomal abnormalities                             | 185            | 0.06          |
| 2017          | XVII    | Congenital malformations, deformations and chromosomal abnormalities                             | 152            | 0.05          |
| 2016          | XVII    | Congenital malformations, deformations and chromosomal abnormalities                             | 144            | 0.04          |
| 2019          | I       | Certain infectious and parasitic diseases                                                        | 134            | 0.04          |
| 2017          | XII     | Diseases of the skin and subcutaneous tissue                                                     | 125            | 0.04          |
| 2019          | XII     | Diseases of the skin and subcutaneous tissue                                                     | 35             | 0.01          |
| 2019          | XIII    | Diseases of the musculoskeletal system and connective tissue                                     | 34             | 0.01          |
| 2018          | XVI     | Certain conditions originating in the perinatal period                                           | 27             | 0.01          |
| 2019          | III     | Diseases of the blood and blood-forming organs and certain disorders involving the immune system | 27             | 0.01          |
| 2016          | XVI     | Certain conditions originating in the perinatal period                                           | 21             | 0.01          |
| 2019          | XVII    | Congenital malformations, deformations and chromosomal abnormalities                             | 13             | 0.00          |
| 2017          | VIII    | Diseases of the ear and mastoid process                                                          | 12             | 0.00          |
| 2018          | XV      | Pregnancy, childbirth and the puerperium                                                         | 12             | 0.00          |
| 2017          | XV      | Pregnancy, childbirth and the puerperium                                                         | 11             | 0.00          |
| 2018          | VIII    | Diseases of the ear and mastoid process                                                          | 11             | 0.00          |
| 2017          | XVI     | Certain conditions originating in the perinatal period                                           | 10             | 0.00          |
| 2016          | VIII    | Diseases of the ear and mastoid process                                                          | 7              | 0.00          |
| 2016          | XV      | Pregnancy, childbirth and the puerperium                                                         | 7              | 0.00          |
| 2019          | XV      | Pregnancy, childbirth and the puerperium                                                         | 5              | 0.00          |
| 2016          | VII     | Diseases of the eye and adnexa                                                                   | 2              | 0.00          |
| 2018          | XIX     | Injury, poisoning and certain other consequences of external causes                              | 1              | 0.00          |
| 2019          | XIX     | Injury, poisoning and certain other consequences of external causes                              | 1              | 0.00          |
| <b>Total</b>  |         |                                                                                                  | <b>330 098</b> | <b>100.00</b> |

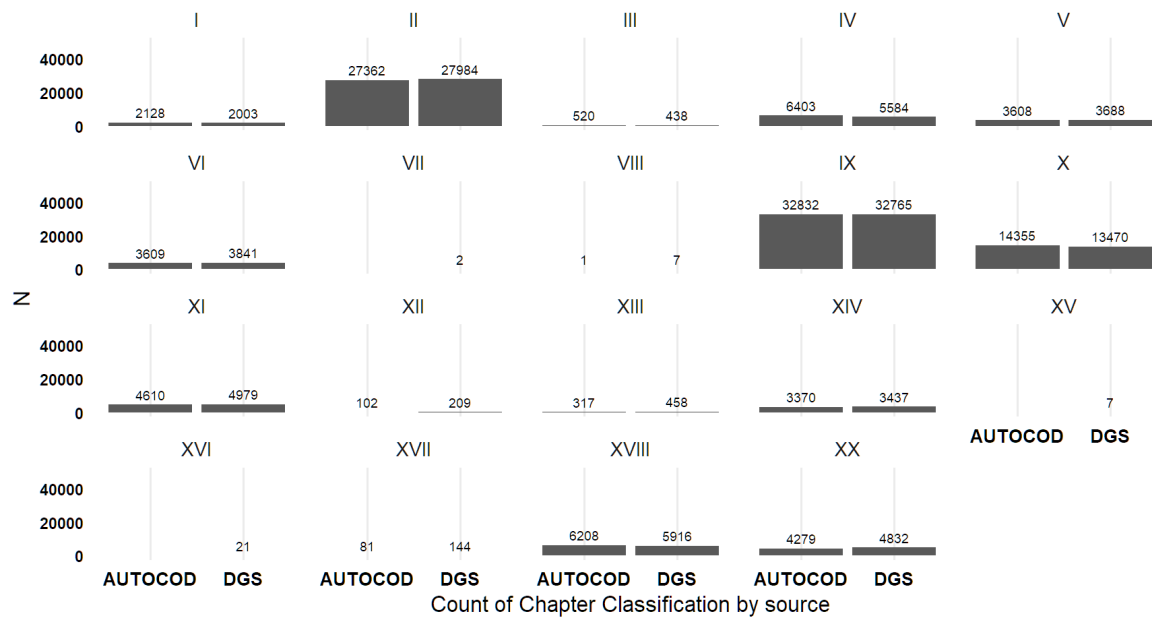

Supplementary Figure 1 - Count of death certificates classified either by human coders (DGS) or by AUTOCOD, for the year 2016

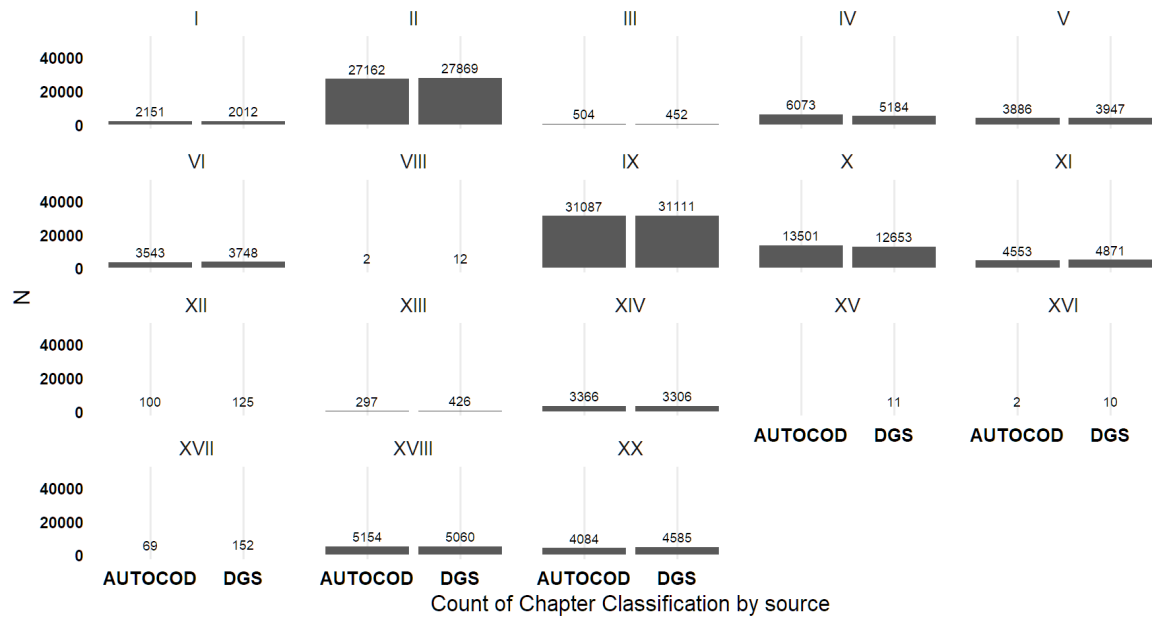

Supplementary Figure 2 - Count of death certificates classified either by human coders (DGS) or by AUTOCOD, for the year 2017

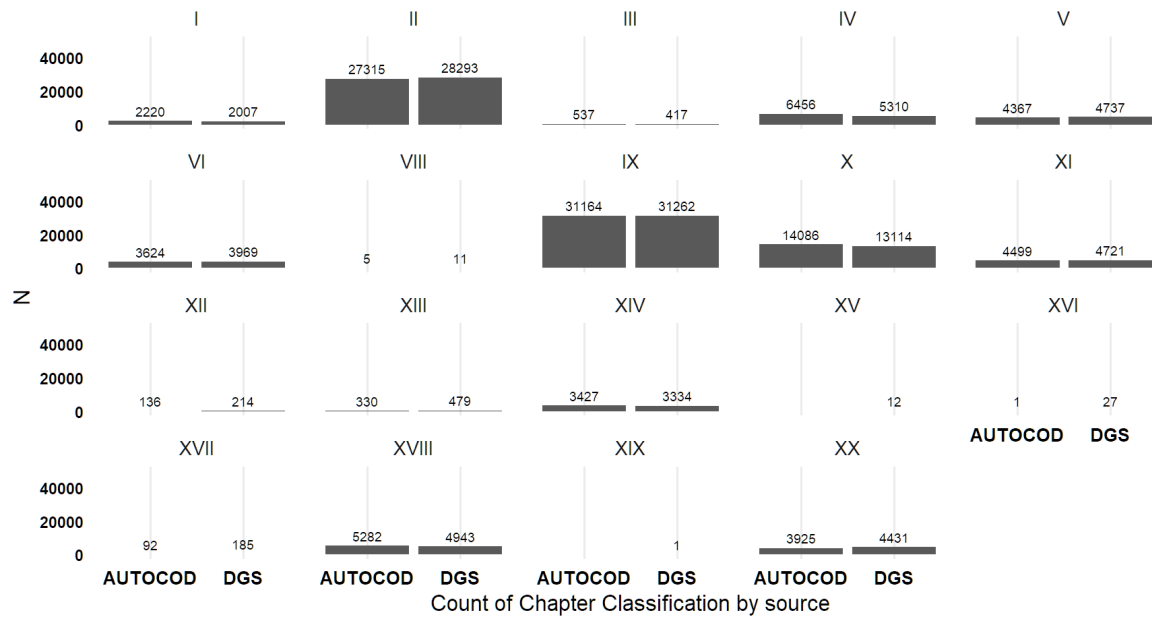

Supplementary Figure 3 - Count of death certificates classified either by human coders (DGS) or by AUTOCOD, for the year 2018

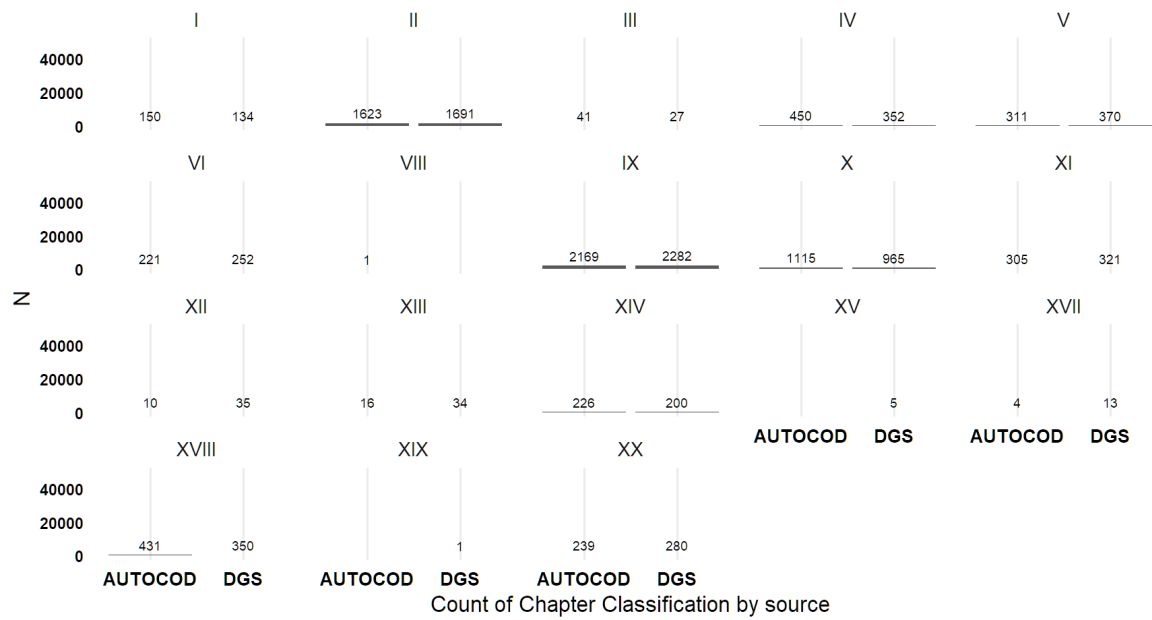

Supplementary Figure 4 - Count of death certificates classified either by human coders (DGS) or by AUTOCOD, for the year 2019

Supplementary Table 9 - Confusion Matrix for all the period analysed

|         |       | Human Coders (gold-standard) |            |     |            |           |     |     |      |            |            |     |     |      |           |    |     |      |            |     |            |
|---------|-------|------------------------------|------------|-----|------------|-----------|-----|-----|------|------------|------------|-----|-----|------|-----------|----|-----|------|------------|-----|------------|
|         |       | I                            | II         | III | IV         | V         | VI  | VII | VIII | IX         | X          | XI  | XII | XIII | XIV       | XV | XVI | XVII | XVIII      | XIX | XX         |
| AUTOCOD | I     | 4,11<br>9                    | 271        | 48  | 192        | 116       | 115 | 0   | 2    | 406        | 235        | 414 | 189 | 78   | 229       | 0  | 6   | 17   | 70         | 0   | 142        |
|         | II    | 188                          | 81,4<br>76 | 49  | 118        | 105       | 101 | 0   | 2    | 424        | 219        | 378 | 11  | 33   | 112       | 2  | 2   | 18   | 40         | 0   | 184        |
|         | III   | 31                           | 234        | 757 | 47         | 29        | 33  | 0   | 2    | 171        | 44         | 102 | 6   | 15   | 53        | 2  | 7   | 8    | 4          | 0   | 57         |
|         | IV    | 233                          | 436        | 58  | 13,2<br>79 | 325       | 291 | 0   | 6    | 2,41<br>3  | 595        | 412 | 54  | 131  | 656       | 5  | 8   | 41   | 103        | 0   | 336        |
|         | V     | 88                           | 113        | 15  | 213        | 9,88<br>0 | 332 | 0   | 1    | 535        | 617        | 58  | 12  | 21   | 120       | 0  | 0   | 3    | 49         | 0   | 115        |
|         | VI    | 88                           | 198        | 24  | 132        | 110       | 8   | 1   | 2    | 387        | 265        | 82  | 6   | 26   | 52        | 0  | 4   | 26   | 33         | 0   | 153        |
|         | VII   | 0                            | 0          | 0   | 0          | 0         | 0   | 0   | 0    | 0          | 0          | 0   | 0   | 0    | 0         | 0  | 0   | 0    | 0          | 0   | 0          |
|         | VIII  | 0                            | 0          | 0   | 1          | 0         | 1   | 0   | 6    | 0          | 0          | 0   | 0   | 0    | 0         | 0  | 0   | 0    | 0          | 0   | 1          |
|         | IX    | 254                          | 838        | 138 | 1,18<br>3  | 788       | 469 | 0   | 4    | 88,8<br>83 | 1,56<br>5  | 741 | 58  | 157  | 674       | 19 | 3   | 97   | 564        | 0   | 817        |
|         | X     | 490                          | 908        | 100 | 521        | 854       | 618 | 0   | 2    | 1,75<br>1  | 35,9<br>62 | 312 | 26  | 242  | 335       | 4  | 9   | 45   | 215        | 1   | 662        |
|         | XI    | 384                          | 521        | 58  | 132        | 52        | 46  | 0   | 0    | 445        | 100        | 84  | 6   | 19   | 100       | 1  | 3   | 16   | 19         | 0   | 181        |
|         | XII   | 35                           | 15         | 1   | 24         | 10        | 3   | 0   | 0    | 31         | 2          | 18  | 173 | 5    | 10        | 0  | 0   | 0    | 1          | 0   | 20         |
|         | XIII  | 35                           | 43         | 13  | 20         | 12        | 24  | 0   | 1    | 69         | 27         | 26  | 2   | 583  | 16        | 1  | 2   | 4    | 6          | 0   | 76         |
|         | XIV   | 99                           | 399        | 31  | 345        | 244       | 164 | 0   | 0    | 718        | 158        | 248 | 23  | 23   | 7,82<br>3 | 0  | 1   | 15   | 15         | 0   | 83         |
|         | XV    | 0                            | 0          | 0   | 0          | 0         | 0   | 0   | 0    | 0          | 0          | 0   | 0   | 0    | 0         | 0  | 0   | 0    | 0          | 0   | 0          |
|         | XVI   | 0                            | 0          | 0   | 0          | 0         | 0   | 0   | 0    | 0          | 0          | 0   | 0   | 0    | 0         | 0  | 3   | 0    | 0          | 0   | 0          |
|         | XVII  | 3                            | 4          | 1   | 2          | 2         | 9   | 0   | 0    | 16         | 4          | 7   | 1   | 0    | 6         | 0  | 0   | 184  | 1          | 0   | 6          |
|         | XVIII | 61                           | 169        | 13  | 158        | 135       | 89  | 1   | 2    | 667        | 271        | 85  | 10  | 14   | 46        | 0  | 1   | 9    | 15,0<br>64 | 0   | 280        |
|         | XIX   | 0                            | 0          | 0   | 0          | 0         | 0   | 0   | 0    | 0          | 0          | 0   | 0   | 0    | 0         | 0  | 0   | 0    | 0          | 0   | 0          |
|         | XX    | 48                           | 212        | 28  | 63         | 80        | 107 | 0   | 0    | 504        | 138        | 125 | 6   | 50   | 45        | 1  | 9   | 10   | 85         | 1   | 11,0<br>15 |

Caption: I - Certain infectious and parasitic diseases; II - Neoplasms; III - Diseases of the blood and blood-forming organs and certain disorders involving the immune system; IV - Endocrine, nutritional and metabolic diseases; V - Mental and behavioural disorders; VI - Diseases of the nervous system; VII - Diseases of the eye and adnexa; VIII - Diseases of the ear and mastoid process; IX - Diseases of the circulatory system; X - Diseases of the respiratory system; XI - Diseases of the digestive system; XII - Diseases of the skin and subcutaneous tissue; XIII - Diseases of the musculoskeletal system and connective tissue; XIV - Diseases of the genitourinary system; XV - Pregnancy, childbirth and the puerperium; XVI - Certain conditions originating in the perinatal period; XVII - Congenital malformations, deformations and chromosomal abnormalities; XVIII - Symptoms, signs and abnormal clinical and laboratory findings, not elsewhere specified; XIX - Injury, poisoning and certain other consequences of external causes; XX - External causes of morbidity and mortality

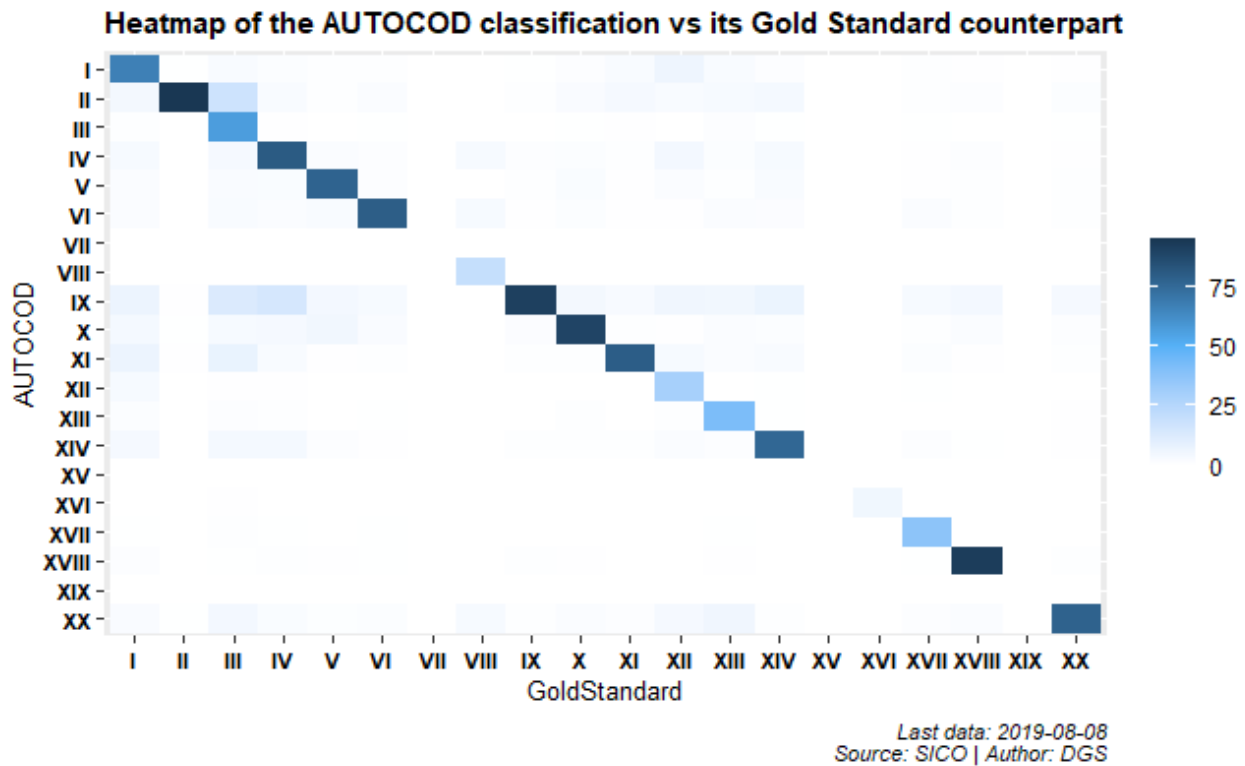

Supplementary Figure 5 - Heatmap of the AUTOCOD classification vs its Gold Standard counterpart. Values (%) on the diagonal represent correct classifications

Caption: I - Certain infectious and parasitic diseases; II - Neoplasms; III - Diseases of the blood and blood-forming organs and certain disorders involving the immune system; IV - Endocrine, nutritional and metabolic diseases; V - Mental and behavioural disorders; VI - Diseases of the nervous system; VII - Diseases of the eye and adnexa; VIII - Diseases of the ear and mastoid process; IX - Diseases of the circulatory system; X - Diseases of the respiratory system; XI - Diseases of the digestive system; XII - Diseases of the skin and subcutaneous tissue; XIII - Diseases of the musculoskeletal system and connective tissue; XIV - Diseases of the genitourinary system; XV - Pregnancy, childbirth and the puerperium; XVI - Certain conditions originating in the perinatal period; XVII - Congenital malformations, deformations and chromosomal abnormalities; XVIII - Symptoms, signs and abnormal clinical and laboratory findings, not elsewhere specified; XIX - Injury, poisoning and certain other consequences of external causes; XX - External causes of morbidity and mortality

Supplementary Table 10 - Overall performance metrics of AUTOCOD during all periods

|                       |      |
|-----------------------|------|
| <b>Accuracy</b>       | 0.88 |
| <b>Kappa</b>          | 0.85 |
| <b>AccuracyLower</b>  | 0.88 |
| <b>AccuracyUpper</b>  | 0.88 |
| <b>AccuracyNull</b>   | 0.30 |
| <b>AccuracyPValue</b> | 0.00 |

Supplementary Table 11 - Performance Metrics of AUTOCOD, by chapter, for all the periods analysed

| Chapter | Sensitivity | Specificity | Pos Pred Value | Neg Pred Value | F1   | Prevalence | Detection Rate | Detection Prevalence | Balanced Accuracy |
|---------|-------------|-------------|----------------|----------------|------|------------|----------------|----------------------|-------------------|
| I       | 0.67        | 0.99        | 0.62           | 0.99           | 0.64 | 0.02       | 0.01           | 0.02                 | 0.83              |
| II      | 0.95        | 0.99        | 0.98           | 0.98           | 0.96 | 0.26       | 0.25           | 0.25                 | 0.97              |
| III     | 0.57        | 1.00        | 0.47           | 1.00           | 0.52 | 0.00       | 0.00           | 0.01                 | 0.78              |
| IV      | 0.81        | 0.98        | 0.69           | 0.99           | 0.74 | 0.05       | 0.04           | 0.06                 | 0.89              |
| V       | 0.78        | 0.99        | 0.81           | 0.99           | 0.79 | 0.04       | 0.03           | 0.04                 | 0.88              |
| VI      | 0.80        | 1.00        | 0.86           | 0.99           | 0.83 | 0.04       | 0.03           | 0.03                 | 0.90              |
| VII     | 0.00        | 1.00        | NaN            | 1.00           | NA   | 0.00       | 0.00           | 0.00                 | 0.50              |
| VIII    | 0.20        | 1.00        | 0.67           | 1.00           | 0.31 | 0.00       | 0.00           | 0.00                 | 0.60              |
| IX      | 0.91        | 0.96        | 0.91           | 0.96           | 0.91 | 0.30       | 0.27           | 0.30                 | 0.94              |
| X       | 0.90        | 0.98        | 0.84           | 0.99           | 0.86 | 0.12       | 0.11           | 0.13                 | 0.94              |
| XI      | 0.80        | 0.99        | 0.85           | 0.99           | 0.82 | 0.05       | 0.04           | 0.04                 | 0.90              |
| XII     | 0.30        | 1.00        | 0.50           | 1.00           | 0.37 | 0.00       | 0.00           | 0.00                 | 0.65              |
| XIII    | 0.42        | 1.00        | 0.61           | 1.00           | 0.50 | 0.00       | 0.00           | 0.00                 | 0.71              |
| XIV     | 0.76        | 0.99        | 0.75           | 0.99           | 0.76 | 0.03       | 0.02           | 0.03                 | 0.88              |
| XV      | 0.00        | 1.00        | NaN            | 1.00           | NA   | 0.00       | 0.00           | 0.00                 | 0.50              |
| XVI     | 0.05        | 1.00        | 1.00           | 1.00           | 0.10 | 0.00       | 0.00           | 0.00                 | 0.53              |
| XVII    | 0.37        | 1.00        | 0.75           | 1.00           | 0.50 | 0.00       | 0.00           | 0.00                 | 0.69              |
| XVIII   | 0.93        | 0.99        | 0.88           | 1.00           | 0.90 | 0.05       | 0.05           | 0.05                 | 0.96              |
| XIX     | 0.00        | 1.00        | NaN            | 1.00           | NA   | 0.00       | 0.00           | 0.00                 | 0.50              |
| XX      | 0.78        | 1.00        | 0.88           | 0.99           | 0.83 | 0.04       | 0.03           | 0.04                 | 0.89              |

Caption: I - Certain infectious and parasitic diseases; II - Neoplasms; III - Diseases of the blood and blood-forming organs and certain disorders involving the immune system; IV - Endocrine, nutritional and metabolic diseases; V - Mental and behavioural disorders; VI - Diseases of the nervous system; VII - Diseases of the eye and adnexa; VIII - Diseases of the ear and mastoid process; IX - Diseases of the circulatory system; X - Diseases of the respiratory system; XI - Diseases of the digestive system; XII - Diseases of the skin and subcutaneous tissue; XIII - Diseases of the musculoskeletal system and connective tissue; XIV - Diseases of the genitourinary system; XV - Pregnancy, childbirth and the puerperium; XVI - Certain conditions originating in the perinatal period; XVII - Congenital malformations, deformations and chromosomal abnormalities; XVIII - Symptoms, signs and abnormal clinical and laboratory findings, not elsewhere specified; XIX - Injury, poisoning and certain other consequences of external causes; XX - External causes of morbidity and mortality



## Periods of excess mortality

Supplementary Table 12 - Distribution of death certificates in the dataset, according to source of classification, for the periods of excess mortality

| Source         | N              | %             |
|----------------|----------------|---------------|
| <b>AUTOCOD</b> | 93 417         | 50.00         |
| <b>DGS</b>     | 93 417         | 50.00         |
| <b>Total</b>   | <b>186 834</b> | <b>100.00</b> |

Supplementary Table 13 - Distribution of death certificates in the dataset, according to ICD-10 chapter (descendent order), for the periods of excess mortality

| Chapter      | Chapter Description                                                                              | N             | %             |
|--------------|--------------------------------------------------------------------------------------------------|---------------|---------------|
| <b>IX</b>    | Diseases of the circulatory system                                                               | 28 399        | 30.40         |
| <b>II</b>    | Neoplasms                                                                                        | 21 136        | 22.63         |
| <b>X</b>     | Diseases of the respiratory system                                                               | 13 466        | 14.41         |
| <b>XVIII</b> | Symptoms, signs and abnormal clinical and laboratory findings, not elsewhere specified           | 5 197         | 5.56          |
| <b>IV</b>    | Endocrine, nutritional and metabolic diseases                                                    | 4 793         | 5.13          |
| <b>XI</b>    | Diseases of the digestive system                                                                 | 3 893         | 4.17          |
| <b>V</b>     | Mental and behavioural disorders                                                                 | 3 756         | 4.02          |
| <b>XX</b>    | External causes of morbidity and mortality                                                       | 3 631         | 3.89          |
| <b>VI</b>    | Diseases of the nervous system                                                                   | 3 456         | 3.70          |
| <b>XIV</b>   | Diseases of the genitourinary system                                                             | 2 851         | 3.05          |
| <b>I</b>     | Certain infectious and parasitic diseases                                                        | 1 696         | 1.82          |
| <b>III</b>   | Diseases of the blood and blood-forming organs and certain disorders involving the immune system | 418           | 0.45          |
| <b>XIII</b>  | Diseases of the musculoskeletal system and connective tissue                                     | 406           | 0.43          |
| <b>XII</b>   | Diseases of the skin and subcutaneous tissue                                                     | 153           | 0.16          |
| <b>XVII</b>  | Congenital malformations, deformations and chromosomal abnormalities                             | 137           | 0.15          |
| <b>XVI</b>   | Certain conditions originating in the perinatal period                                           | 12            | 0.01          |
| <b>VIII</b>  | Diseases of the ear and mastoid process                                                          | 8             | 0.01          |
| <b>XV</b>    | Pregnancy, childbirth and the puerperium                                                         | 6             | 0.01          |
| <b>XIX</b>   | Injury, poisoning and certain other consequences of external causes                              | 2             | 0.00          |
| <b>VII</b>   | Diseases of the eye and adnexa                                                                   | 1             | 0.00          |
| <b>Total</b> |                                                                                                  | <b>93 417</b> | <b>100.00</b> |

Supplementary Table 14 - Distribution of death certificates according to year of death, for the periods of excess mortality

| Year of Death | N             | %             |
|---------------|---------------|---------------|
| <b>2016</b>   | 29 381        | 31.45         |
| <b>2017</b>   | 30 263        | 32.40         |
| <b>2018</b>   | 29 624        | 31.71         |
| <b>2019</b>   | 4 149         | 4.44          |
| <b>Total</b>  | <b>93 417</b> | <b>100.00</b> |

Supplementary Table 15 - Distribution of death certificates, according to year of death and ICD-10 chapter, for the periods of excess mortality

| Year of Death | Chapter | Chapter Description                                                                              | N     | %    |
|---------------|---------|--------------------------------------------------------------------------------------------------|-------|------|
| 2017          | IX      | Diseases of the circulatory system                                                               | 9 294 | 9.95 |
| 2018          | IX      | Diseases of the circulatory system                                                               | 8 975 | 9.61 |
| 2016          | IX      | Diseases of the circulatory system                                                               | 8 786 | 9.41 |
| 2016          | II      | Neoplasms                                                                                        | 7 048 | 7.54 |
| 2017          | II      | Neoplasms                                                                                        | 6 611 | 7.08 |
| 2018          | II      | Neoplasms                                                                                        | 6 569 | 7.03 |
| 2018          | X       | Diseases of the respiratory system                                                               | 4 574 | 4.90 |
| 2017          | X       | Diseases of the respiratory system                                                               | 4 358 | 4.67 |
| 2016          | X       | Diseases of the respiratory system                                                               | 3 960 | 4.24 |
| 2016          | XVIII   | Symptoms, signs and abnormal clinical and laboratory findings, not elsewhere specified           | 1 730 | 1.85 |
| 2017          | XVIII   | Symptoms, signs and abnormal clinical and laboratory findings, not elsewhere specified           | 1 725 | 1.85 |
| 2018          | IV      | Endocrine, nutritional and metabolic diseases                                                    | 1 573 | 1.68 |
| 2017          | IV      | Endocrine, nutritional and metabolic diseases                                                    | 1 562 | 1.67 |
| 2018          | XVIII   | Symptoms, signs and abnormal clinical and laboratory findings, not elsewhere specified           | 1 540 | 1.65 |
| 2016          | IV      | Endocrine, nutritional and metabolic diseases                                                    | 1 479 | 1.58 |
| 2019          | IX      | Diseases of the circulatory system                                                               | 1 344 | 1.44 |
| 2016          | XI      | Diseases of the digestive system                                                                 | 1 310 | 1.40 |
| 2018          | V       | Mental and behavioural disorders                                                                 | 1 244 | 1.33 |
| 2017          | XI      | Diseases of the digestive system                                                                 | 1 241 | 1.33 |
| 2017          | V       | Mental and behavioural disorders                                                                 | 1 221 | 1.31 |
| 2017          | XX      | External causes of morbidity and mortality                                                       | 1 192 | 1.28 |
| 2016          | XX      | External causes of morbidity and mortality                                                       | 1 175 | 1.26 |
| 2017          | VI      | Diseases of the nervous system                                                                   | 1 171 | 1.25 |
| 2018          | XI      | Diseases of the digestive system                                                                 | 1 161 | 1.24 |
| 2018          | XX      | External causes of morbidity and mortality                                                       | 1 119 | 1.20 |
| 2018          | VI      | Diseases of the nervous system                                                                   | 1 073 | 1.15 |
| 2016          | V       | Mental and behavioural disorders                                                                 | 1 071 | 1.15 |
| 2016          | VI      | Diseases of the nervous system                                                                   | 1 065 | 1.14 |
| 2017          | XIV     | Diseases of the genitourinary system                                                             | 938   | 1.00 |
| 2018          | XIV     | Diseases of the genitourinary system                                                             | 925   | 0.99 |
| 2019          | II      | Neoplasms                                                                                        | 908   | 0.97 |
| 2016          | XIV     | Diseases of the genitourinary system                                                             | 873   | 0.93 |
| 2017          | I       | Certain infectious and parasitic diseases                                                        | 574   | 0.61 |
| 2019          | X       | Diseases of the respiratory system                                                               | 574   | 0.61 |
| 2016          | I       | Certain infectious and parasitic diseases                                                        | 528   | 0.57 |
| 2018          | I       | Certain infectious and parasitic diseases                                                        | 520   | 0.56 |
| 2019          | V       | Mental and behavioural disorders                                                                 | 220   | 0.24 |
| 2019          | XVIII   | Symptoms, signs and abnormal clinical and laboratory findings, not elsewhere specified           | 202   | 0.22 |
| 2019          | XI      | Diseases of the digestive system                                                                 | 181   | 0.19 |
| 2019          | IV      | Endocrine, nutritional and metabolic diseases                                                    | 179   | 0.19 |
| 2017          | III     | Diseases of the blood and blood-forming organs and certain disorders involving the immune system | 150   | 0.16 |
| 2019          | VI      | Diseases of the nervous system                                                                   | 147   | 0.16 |

Supplementary Table 16 - Distribution of death certificates, according to year of death and ICD-10 chapter, for the periods of excess mortality (cont.)

| Year of Death | Chapter | Chapter Description                                                                              | N             | %             |
|---------------|---------|--------------------------------------------------------------------------------------------------|---------------|---------------|
| 2019          | XX      | External causes of morbidity and mortality                                                       | 145           | 0.16          |
| 2017          | XIII    | Diseases of the musculoskeletal system and connective tissue                                     | 139           | 0.15          |
| 2016          | III     | Diseases of the blood and blood-forming organs and certain disorders involving the immune system | 130           | 0.14          |
| 2018          | XIII    | Diseases of the musculoskeletal system and connective tissue                                     | 128           | 0.14          |
| 2018          | III     | Diseases of the blood and blood-forming organs and certain disorders involving the immune system | 126           | 0.13          |
| 2016          | XIII    | Diseases of the musculoskeletal system and connective tissue                                     | 120           | 0.13          |
| 2019          | XIV     | Diseases of the genitourinary system                                                             | 115           | 0.12          |
| 2019          | I       | Certain infectious and parasitic diseases                                                        | 74            | 0.08          |
| 2016          | XII     | Diseases of the skin and subcutaneous tissue                                                     | 52            | 0.06          |
| 2017          | XVII    | Congenital malformations, deformations and chromosomal abnormalities                             | 49            | 0.05          |
| 2018          | XII     | Diseases of the skin and subcutaneous tissue                                                     | 48            | 0.05          |
| 2016          | XVII    | Congenital malformations, deformations and chromosomal abnormalities                             | 45            | 0.05          |
| 2018          | XVII    | Congenital malformations, deformations and chromosomal abnormalities                             | 37            | 0.04          |
| 2017          | XII     | Diseases of the skin and subcutaneous tissue                                                     | 34            | 0.04          |
| 2019          | XII     | Diseases of the skin and subcutaneous tissue                                                     | 19            | 0.02          |
| 2019          | XIII    | Diseases of the musculoskeletal system and connective tissue                                     | 19            | 0.02          |
| 2019          | III     | Diseases of the blood and blood-forming organs and certain disorders involving the immune system | 12            | 0.01          |
| 2016          | XVI     | Certain conditions originating in the perinatal period                                           | 6             | 0.01          |
| 2018          | XVI     | Certain conditions originating in the perinatal period                                           | 6             | 0.01          |
| 2019          | XVII    | Congenital malformations, deformations and chromosomal abnormalities                             | 6             | 0.01          |
| 2018          | VIII    | Diseases of the ear and mastoid process                                                          | 5             | 0.01          |
| 2019          | XV      | Pregnancy, childbirth and the puerperium                                                         | 3             | 0.00          |
| 2017          | VIII    | Diseases of the ear and mastoid process                                                          | 2             | 0.00          |
| 2017          | XV      | Pregnancy, childbirth and the puerperium                                                         | 2             | 0.00          |
| 2016          | VII     | Diseases of the eye and adnexa                                                                   | 1             | 0.00          |
| 2016          | VIII    | Diseases of the ear and mastoid process                                                          | 1             | 0.00          |
| 2016          | XV      | Pregnancy, childbirth and the puerperium                                                         | 1             | 0.00          |
| 2018          | XIX     | Injury, poisoning and certain other consequences of external causes                              | 1             | 0.00          |
| 2019          | XIX     | Injury, poisoning and certain other consequences of external causes                              | 1             | 0.00          |
| <b>Total</b>  |         |                                                                                                  | <b>93 417</b> | <b>100.00</b> |

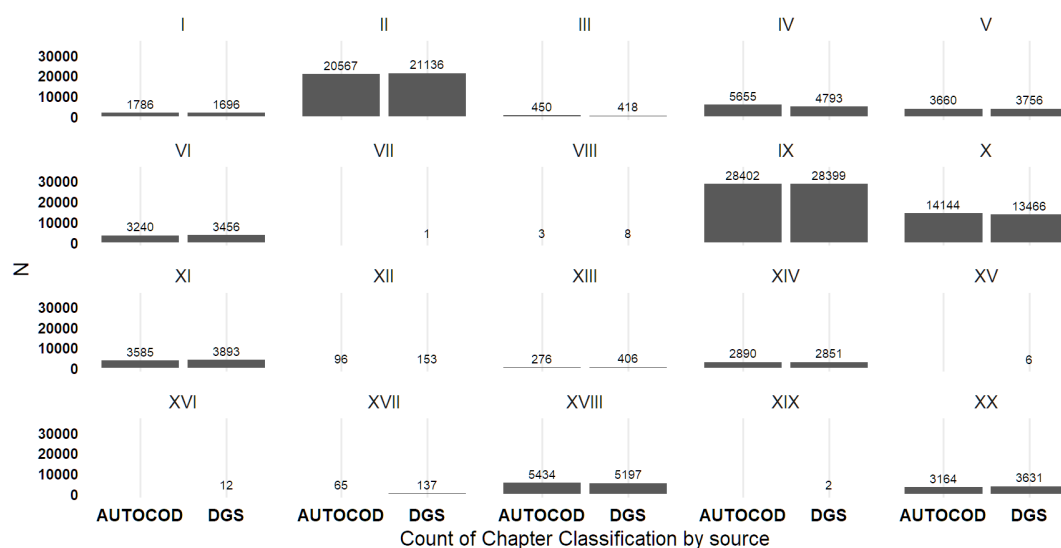

Supplementary Figure 6 – Count of death certificates classified either by human coders (DGS) or by AUTOCOD, for periods of excess mortality

Supplementary Table 17 - Confusion Matrix for the excess mortality periods

|         |       | Human Coders (GOLD-STANDARD) |           |         |          |          |          |     |      |           |           |          |        |         |          |    |     |      |       |     |          |
|---------|-------|------------------------------|-----------|---------|----------|----------|----------|-----|------|-----------|-----------|----------|--------|---------|----------|----|-----|------|-------|-----|----------|
|         |       | I                            | II        | III     | IV       | V        | VI       | VII | VIII | IX        | X         | XI       | XII    | XIII    | XIV      | XV | XVI | XVII | XVIII | XIX | XX       |
| AUTOCOD | I     | 113<br>5                     | 76        | 8       | 51       | 27       | 23       | 0   | 0    | 93        | 87        | 113      | 4<br>1 | 18      | 57       | 0  | 2   | 3    | 23    | 0   | 29       |
|         | II    | 38                           | 1999<br>0 | 20      | 36       | 19       | 32       | 0   | 1    | 143       | 64        | 114      | 2      | 9       | 32       | 0  | 0   | 7    | 9     | 0   | 51       |
|         | III   | 4                            | 61        | 23<br>1 | 12       | 8        | 8        | 0   | 0    | 43        | 12        | 25       | 1      | 3       | 13       | 0  | 4   | 2    | 2     | 0   | 21       |
|         | IV    | 70                           | 120       | 23      | 388<br>0 | 94       | 82       | 0   | 2    | 698       | 231       | 99       | 2<br>1 | 33      | 171      | 0  | 0   | 10   | 31    | 0   | 90       |
|         | V     | 39                           | 23        | 6       | 69       | 292<br>4 | 107      | 0   | 1    | 157       | 226       | 14       | 2      | 8       | 34       | 0  | 0   | 2    | 13    | 0   | 35       |
|         | VI    | 26                           | 47        | 4       | 35       | 31       | 277<br>4 | 1   | 0    | 112       | 99        | 21       | 3      | 5       | 19       | 0  | 0   | 7    | 13    | 0   | 43       |
|         | VII   | 0                            | 0         | 0       | 0        | 0        | 0        | 0   | 0    | 0         | 0         | 0        | 0      | 0       | 0        | 0  | 0   | 0    | 0     | 0   | 0        |
|         | VIII  | 0                            | 0         | 0       | 0        | 0        | 0        | 0   | 2    | 0         | 0         | 0        | 0      | 0       | 0        | 0  | 0   | 0    | 0     | 0   | 1        |
|         | IX    | 81                           | 222       | 45      | 361      | 245      | 139      | 0   | 0    | 2588<br>2 | 517       | 205      | 1<br>6 | 43      | 207      | 4  | 0   | 32   | 183   | 0   | 220      |
|         | X     | 147                          | 271       | 31      | 157      | 253      | 176      | 0   | 1    | 546       | 1199<br>3 | 96       | 4      | 85      | 94       | 2  | 4   | 12   | 72    | 1   | 199      |
|         | XI    | 80                           | 120       | 23      | 27       | 15       | 9        | 0   | 0    | 125       | 29        | 305<br>8 | 0      | 4       | 29       | 0  | 1   | 8    | 9     | 0   | 48       |
|         | XII   | 8                            | 3         | 0       | 7        | 5        | 0        | 0   | 0    | 4         | 1         | 2        | 5<br>4 | 2       | 4        | 0  | 0   | 0    | 0     | 0   | 6        |
|         | XIII  | 6                            | 6         | 2       | 3        | 5        | 8        | 0   | 1    | 24        | 9         | 10       | 1      | 16<br>9 | 5        | 0  | 0   | 0    | 3     | 0   | 24       |
|         | XIV   | 22                           | 106       | 10      | 96       | 62       | 39       | 0   | 0    | 216       | 57        | 88       | 3      | 7       | 215<br>8 | 0  | 0   | 3    | 6     | 0   | 17       |
|         | XV    | 0                            | 0         | 0       | 0        | 0        | 0        | 0   | 0    | 0         | 0         | 0        | 0      | 0       | 0        | 0  | 0   | 0    | 0     | 0   | 0        |
|         | XVI   | 0                            | 0         | 0       | 0        | 0        | 0        | 0   | 0    | 0         | 0         | 0        | 0      | 0       | 0        | 0  | 0   | 0    | 0     | 0   | 0        |
|         | XVII  | 1                            | 1         | 1       | 0        | 2        | 3        | 0   | 0    | 3         | 2         | 2        | 0      | 0       | 3        | 0  | 0   | 46   | 0     | 0   | 1        |
|         | XVIII | 26                           | 45        | 7       | 45       | 44       | 29       | 0   | 0    | 216       | 98        | 18       | 3      | 2       | 14       | 0  | 1   | 2    | 4806  | 0   | 78       |
|         | XIX   | 0                            | 0         | 0       | 0        | 0        | 0        | 0   | 0    | 0         | 0         | 0        | 0      | 0       | 0        | 0  | 0   | 0    | 0     | 0   | 0        |
|         | XX    | 13                           | 45        | 7       | 14       | 22       | 27       | 0   | 0    | 137       | 41        | 28       | 2      | 18      | 11       | 0  | 0   | 3    | 27    | 1   | 276<br>8 |

Caption: I - Certain infectious and parasitic diseases; II - Neoplasms; III - Diseases of the blood and blood-forming organs and certain disorders involving the immune system; IV - Endocrine, nutritional and metabolic diseases; V - Mental and behavioural disorders; VI - Diseases of the nervous system; VII - Diseases of the eye and adnexa; VIII - Diseases of the ear and mastoid process; IX - Diseases of the circulatory system; X - Diseases of the respiratory system; XI - Diseases of the digestive system; XII - Diseases of the skin and subcutaneous tissue; XIII - Diseases of the musculoskeletal system and connective tissue; XIV - Diseases of the genitourinary system; XV - Pregnancy, childbirth and the puerperium; XVI - Certain conditions originating in the perinatal period; XVII - Congenital malformations, deformations and chromosomal abnormalities; XVIII - Symptoms, signs and abnormal clinical and laboratory findings, not elsewhere specified; XIX - Injury, poisoning and certain other consequences of external causes; XX - External causes of morbidity and mortality

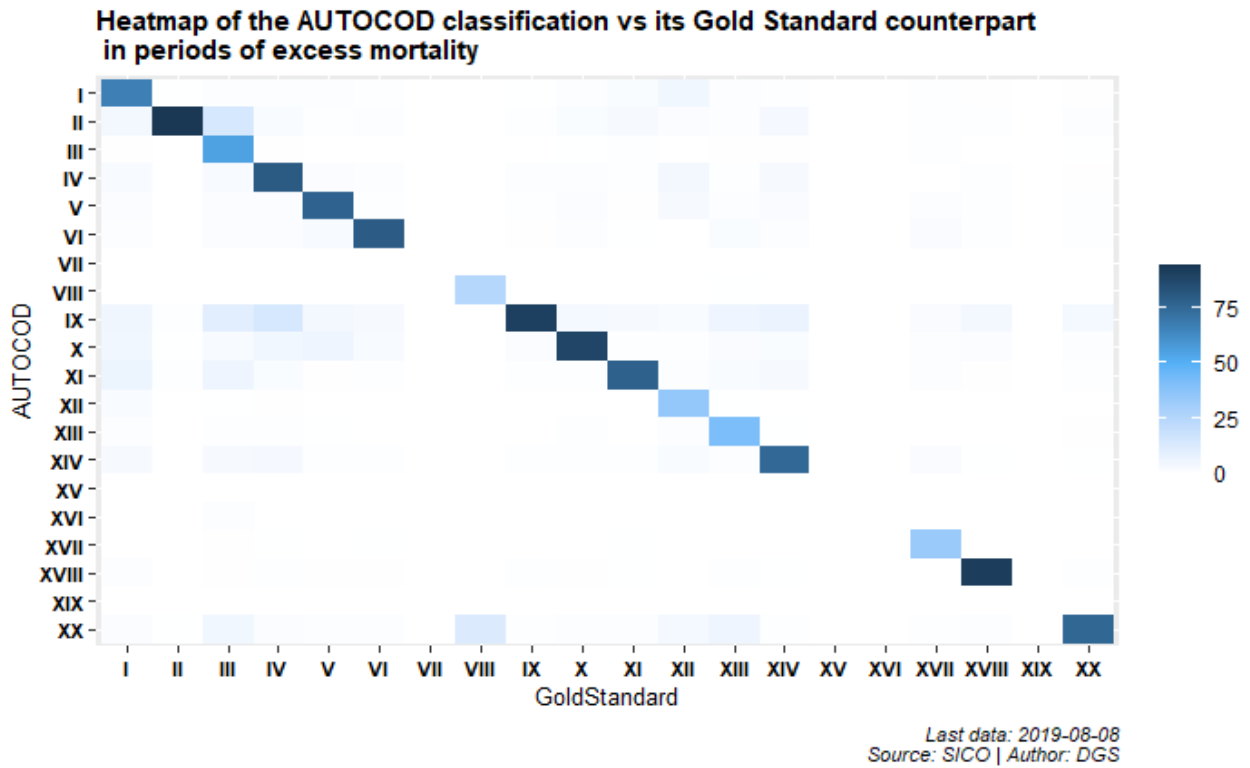

Supplementary Figure 7 - Heatmap of the AUTOCOD classification vs its Gold Standard counterpart in periods of excess mortality. Values on the diagonal represent correct classifications.

Caption: I - Certain infectious and parasitic diseases; II - Neoplasms; III - Diseases of the blood and blood-forming organs and certain disorders involving the immune system; IV - Endocrine, nutritional and metabolic diseases; V - Mental and behavioural disorders; VI - Diseases of the nervous system; VII - Diseases of the eye and adnexa; VIII - Diseases of the ear and mastoid process; IX - Diseases of the circulatory system; X - Diseases of the respiratory system; XI - Diseases of the digestive system; XII - Diseases of the skin and subcutaneous tissue; XIII - Diseases of the musculoskeletal system and connective tissue; XIV - Diseases of the genitourinary system; XV - Pregnancy, childbirth and the puerperium; XVI - Certain conditions originating in the perinatal period; XVII - Congenital malformations, deformations and chromosomal abnormalities; XVIII - Symptoms, signs and abnormal clinical and laboratory findings, not elsewhere specified; XIX - Injury, poisoning and certain other consequences of external causes; XX - External causes of morbidity and mortality

Supplementary Table 18 - Overall performance metrics of AUTOCOD during excess mortality periods

|                       |      |
|-----------------------|------|
| <b>Accuracy</b>       | 0.88 |
| <b>Kappa</b>          | 0.85 |
| <b>AccuracyLower</b>  | 0.87 |
| <b>AccuracyUpper</b>  | 0.88 |
| <b>AccuracyNull</b>   | 0.30 |
| <b>AccuracyPValue</b> | 0.00 |

Supplementary Table 19 - Performance Metrics of AUTOCOD, by class, for the excess mortality periods

| Chapter      | Sensitivity | Specificity | Pos Pred Value | Neg Pred Value | F1   | Prevalence | Detection Rate | Detection Prevalence | Balanced Accuracy |
|--------------|-------------|-------------|----------------|----------------|------|------------|----------------|----------------------|-------------------|
| <b>I</b>     | 0.67        | 0.99        | 0.64           | 0.99           | 0.65 | 0.02       | 0.01           | 0.02                 | 0.83              |
| <b>II</b>    | 0.95        | 0.99        | 0.97           | 0.98           | 0.96 | 0.23       | 0.21           | 0.22                 | 0.97              |
| <b>III</b>   | 0.55        | 1.00        | 0.51           | 1.00           | 0.53 | 0.00       | 0.00           | 0.01                 | 0.78              |
| <b>IV</b>    | 0.81        | 0.98        | 0.69           | 0.99           | 0.74 | 0.05       | 0.04           | 0.06                 | 0.90              |
| <b>V</b>     | 0.78        | 0.99        | 0.80           | 0.99           | 0.79 | 0.04       | 0.03           | 0.04                 | 0.89              |
| <b>VI</b>    | 0.80        | 1.00        | 0.86           | 0.99           | 0.83 | 0.04       | 0.03           | 0.04                 | 0.90              |
| <b>VII</b>   | 0.00        | 1.00        | NaN            | 1.00           | NA   | 0.00       | 0.00           | 0.00                 | 0.50              |
| <b>VIII</b>  | 0.25        | 1.00        | 0.67           | 1.00           | 0.36 | 0.00       | 0.00           | 0.00                 | 0.63              |
| <b>IX</b>    | 0.91        | 0.96        | 0.91           | 0.96           | 0.91 | 0.30       | 0.28           | 0.30                 | 0.94              |
| <b>X</b>     | 0.89        | 0.97        | 0.85           | 0.98           | 0.87 | 0.14       | 0.13           | 0.15                 | 0.93              |
| <b>XI</b>    | 0.79        | 0.99        | 0.85           | 0.99           | 0.82 | 0.04       | 0.03           | 0.04                 | 0.89              |
| <b>XII</b>   | 0.35        | 1           | 0.56           | 1              | 0.43 | 0          | 0              | 0                    | 0.68              |
| <b>XIII</b>  | 0.42        | 1           | 0.61           | 1              | 0.5  | 0          | 0              | 0                    | 0.71              |
| <b>XIV</b>   | 0.76        | 0.99        | 0.75           | 0.99           | 0.75 | 0.03       | 0.02           | 0.03                 | 0.87              |
| <b>XV</b>    | 0           | 1           | NaN            | 1              | NA   | 0          | 0              | 0                    | 0.5               |
| <b>XVI</b>   | 0           | 1           | NaN            | 1              | NA   | 0          | 0              | 0                    | 0.5               |
| <b>XVII</b>  | 0.34        | 1           | 0.71           | 1              | 0.46 | 0          | 0              | 0                    | 0.67              |
| <b>XVIII</b> | 0.93        | 0.99        | 0.88           | 1              | 0.9  | 0.06       | 0.05           | 0.06                 | 0.96              |
| <b>XIX</b>   | 0           | 1           | NaN            | 1              | NA   | 0          | 0              | 0                    | 0.5               |
| <b>XX</b>    | 0.76        | 1           | 0.88           | 0.99           | 0.82 | 0.04       | 0.03           | 0.03                 | 0.88              |

Caption: I - Certain infectious and parasitic diseases; II - Neoplasms; III - Diseases of the blood and blood-forming organs and certain disorders involving the immune system; IV - Endocrine, nutritional and metabolic diseases; V - Mental and behavioural disorders; VI - Diseases of the nervous system; VII - Diseases of the eye and adnexa; VIII - Diseases of the ear and mastoid process; IX - Diseases of the circulatory system; X - Diseases of the respiratory system; XI - Diseases of the digestive system; XII - Diseases of the skin and subcutaneous tissue; XIII - Diseases of the musculoskeletal system and connective tissue; XIV - Diseases of the genitourinary system; XV - Pregnancy, childbirth and the puerperium; XVI - Certain conditions originating in the perinatal period; XVII - Congenital malformations, deformations and chromosomal abnormalities; XVIII - Symptoms, signs and abnormal clinical and laboratory findings, not elsewhere specified; XIX - Injury, poisoning and certain other consequences of external causes; XX - External causes of morbidity and mortality

## Periods without excess mortality

Supplementary Table 20 - Distribution of death certificates in the dataset, according to source of classification, for the periods without excess mortality

| Source         | N              | %             |
|----------------|----------------|---------------|
| <b>AUTOCOD</b> | 236 681        | 50.00         |
| <b>DGS</b>     | 236 681        | 50.00         |
| <b>Total</b>   | <b>473 362</b> | <b>100.00</b> |

Supplementary Table 21 - Distribution of death certificates in the dataset, according to ICD-10 chapter (descendent order), for the periods without excess mortality

| Chapter      | Chapter Description                                                                              | N              | %             |
|--------------|--------------------------------------------------------------------------------------------------|----------------|---------------|
| <b>IX</b>    | Diseases of the circulatory system                                                               | 69 021         | 29.16         |
| <b>II</b>    | Neoplasms                                                                                        | 64 701         | 27.34         |
| <b>X</b>     | Diseases of the respiratory system                                                               | 26 736         | 11.30         |
| <b>IV</b>    | Endocrine, nutritional and metabolic diseases                                                    | 11 637         | 4.92          |
| <b>XVIII</b> | Symptoms, signs and abnormal clinical and laboratory findings, not elsewhere specified           | 11 072         | 4.68          |
| <b>XI</b>    | Diseases of the digestive system                                                                 | 10 999         | 4.65          |
| <b>XX</b>    | External causes of morbidity and mortality                                                       | 10 497         | 4.44          |
| <b>V</b>     | Mental and behavioural disorders                                                                 | 8 986          | 3.80          |
| <b>VI</b>    | Diseases of the nervous system                                                                   | 8 354          | 3.53          |
| <b>XIV</b>   | Diseases of the genitourinary system                                                             | 7 426          | 3.14          |
| <b>I</b>     | Certain infectious and parasitic diseases                                                        | 4 460          | 1.88          |
| <b>XIII</b>  | Diseases of the musculoskeletal system and connective tissue                                     | 991            | 0.42          |
| <b>III</b>   | Diseases of the blood and blood-forming organs and certain disorders involving the immune system | 916            | 0.39          |
| <b>XII</b>   | Diseases of the skin and subcutaneous tissue                                                     | 430            | 0.18          |
| <b>XVII</b>  | Congenital malformations, deformations and chromosomal abnormalities                             | 357            | 0.15          |
| <b>XVI</b>   | Certain conditions originating in the perinatal period                                           | 46             | 0.02          |
| <b>XV</b>    | Pregnancy, childbirth and the puerperium                                                         | 29             | 0.01          |
| <b>VIII</b>  | Diseases of the ear and mastoid process                                                          | 22             | 0.01          |
| <b>VII</b>   | Diseases of the eye and adnexa                                                                   | 1              | 0.00          |
| <b>Total</b> |                                                                                                  | <b>236 681</b> | <b>100.00</b> |

Supplementary Table 22 - Distribution of death certificates according to year of death, for the periods without excess mortality

| Year of Death | N              | %             |
|---------------|----------------|---------------|
| <b>2016</b>   | 80 404         | 33.97         |
| <b>2017</b>   | 75 271         | 31.80         |
| <b>2018</b>   | 77 843         | 32.89         |
| <b>2019</b>   | 3 163          | 1.34          |
| <b>Total</b>  | <b>236 681</b> | <b>100.00</b> |

Supplementary Table 23 - Distribution of death certificates, according to year of death and ICD-10 chapter, for the periods without excess mortality

| Year of Death | Chapter | Chapter Description                                                                              | N      | %     |
|---------------|---------|--------------------------------------------------------------------------------------------------|--------|-------|
| 2016          | IX      | Diseases of the circulatory system                                                               | 23 979 | 10.13 |
| 2018          | IX      | Diseases of the circulatory system                                                               | 22 287 | 9.42  |
| 2017          | IX      | Diseases of the circulatory system                                                               | 21 817 | 9.22  |
| 2018          | II      | Neoplasms                                                                                        | 21 724 | 9.18  |
| 2017          | II      | Neoplasms                                                                                        | 21 258 | 8.98  |
| 2016          | II      | Neoplasms                                                                                        | 20 936 | 8.85  |
| 2016          | X       | Diseases of the respiratory system                                                               | 9 510  | 4.02  |
| 2018          | X       | Diseases of the respiratory system                                                               | 8 540  | 3.61  |
| 2017          | X       | Diseases of the respiratory system                                                               | 8 295  | 3.50  |
| 2016          | XVIII   | Symptoms, signs and abnormal clinical and laboratory findings, not elsewhere specified           | 4 186  | 1.77  |
| 2016          | IV      | Endocrine, nutritional and metabolic diseases                                                    | 4 105  | 1.73  |
| 2018          | IV      | Endocrine, nutritional and metabolic diseases                                                    | 3 737  | 1.58  |
| 2016          | XI      | Diseases of the digestive system                                                                 | 3 669  | 1.55  |
| 2016          | XX      | External causes of morbidity and mortality                                                       | 3 657  | 1.55  |
| 2017          | XI      | Diseases of the digestive system                                                                 | 3 630  | 1.53  |
| 2017          | IV      | Endocrine, nutritional and metabolic diseases                                                    | 3 622  | 1.53  |
| 2018          | XI      | Diseases of the digestive system                                                                 | 3 560  | 1.50  |
| 2018          | V       | Mental and behavioural disorders                                                                 | 3 493  | 1.48  |
| 2018          | XVIII   | Symptoms, signs and abnormal clinical and laboratory findings, not elsewhere specified           | 3 403  | 1.44  |
| 2017          | XX      | External causes of morbidity and mortality                                                       | 3 393  | 1.43  |
| 2017          | XVIII   | Symptoms, signs and abnormal clinical and laboratory findings, not elsewhere specified           | 3 335  | 1.41  |
| 2018          | XX      | External causes of morbidity and mortality                                                       | 3 312  | 1.40  |
| 2018          | VI      | Diseases of the nervous system                                                                   | 2 896  | 1.22  |
| 2016          | VI      | Diseases of the nervous system                                                                   | 2 776  | 1.17  |
| 2017          | V       | Mental and behavioural disorders                                                                 | 2 726  | 1.15  |
| 2016          | V       | Mental and behavioural disorders                                                                 | 2 617  | 1.11  |
| 2017          | VI      | Diseases of the nervous system                                                                   | 2 577  | 1.09  |
| 2016          | XIV     | Diseases of the genitourinary system                                                             | 2 564  | 1.08  |
| 2018          | XIV     | Diseases of the genitourinary system                                                             | 2 409  | 1.02  |
| 2017          | XIV     | Diseases of the genitourinary system                                                             | 2 368  | 1.00  |
| 2018          | I       | Certain infectious and parasitic diseases                                                        | 1 487  | 0.63  |
| 2016          | I       | Certain infectious and parasitic diseases                                                        | 1 475  | 0.62  |
| 2017          | I       | Certain infectious and parasitic diseases                                                        | 1 438  | 0.61  |
| 2019          | IX      | Diseases of the circulatory system                                                               | 938    | 0.40  |
| 2019          | II      | Neoplasms                                                                                        | 783    | 0.33  |
| 2019          | X       | Diseases of the respiratory system                                                               | 391    | 0.17  |
| 2018          | XIII    | Diseases of the musculoskeletal system and connective tissue                                     | 351    | 0.15  |
| 2016          | XIII    | Diseases of the musculoskeletal system and connective tissue                                     | 338    | 0.14  |
| 2016          | III     | Diseases of the blood and blood-forming organs and certain disorders involving the immune system | 308    | 0.13  |
| 2017          | III     | Diseases of the blood and blood-forming organs and certain disorders involving the immune system | 302    | 0.13  |
| 2018          | III     | Diseases of the blood and blood-forming organs and certain disorders involving the immune system | 291    | 0.12  |
| 2017          | XIII    | Diseases of the musculoskeletal system and connective tissue                                     | 287    | 0.12  |



Supplementary Table 24 - Distribution of death certificates, according to year of death and ICD-10 chapter, for the periods without excess mortality (cont.)

| Year of Death | Chapter | Chapter Description                                                                              | N              | %             |
|---------------|---------|--------------------------------------------------------------------------------------------------|----------------|---------------|
| 2019          | IV      | Endocrine, nutritional and metabolic diseases                                                    | 173            | 0.07          |
| 2018          | XII     | Diseases of the skin and subcutaneous tissue                                                     | 166            | 0.07          |
| 2016          | XII     | Diseases of the skin and subcutaneous tissue                                                     | 157            | 0.07          |
| 2019          | V       | Mental and behavioural disorders                                                                 | 150            | 0.06          |
| 2018          | XVII    | Congenital malformations, deformations and chromosomal abnormalities                             | 148            | 0.06          |
| 2019          | XVIII   | Symptoms, signs and abnormal clinical and laboratory findings, not elsewhere specified           | 148            | 0.06          |
| 2019          | XI      | Diseases of the digestive system                                                                 | 140            | 0.06          |
| 2019          | XX      | External causes of morbidity and mortality                                                       | 135            | 0.06          |
| 2019          | VI      | Diseases of the nervous system                                                                   | 105            | 0.04          |
| 2017          | XVII    | Congenital malformations, deformations and chromosomal abnormalities                             | 103            | 0.04          |
| 2016          | XVII    | Congenital malformations, deformations and chromosomal abnormalities                             | 99             | 0.04          |
| 2017          | XII     | Diseases of the skin and subcutaneous tissue                                                     | 91             | 0.04          |
| 2019          | XIV     | Diseases of the genitourinary system                                                             | 85             | 0.04          |
| 2019          | I       | Certain infectious and parasitic diseases                                                        | 60             | 0.03          |
| 2018          | XVI     | Certain conditions originating in the perinatal period                                           | 21             | 0.01          |
| 2019          | XII     | Diseases of the skin and subcutaneous tissue                                                     | 16             | 0.01          |
| 2016          | XVI     | Certain conditions originating in the perinatal period                                           | 15             | 0.01          |
| 2019          | III     | Diseases of the blood and blood-forming organs and certain disorders involving the immune system | 15             | 0.01          |
| 2019          | XIII    | Diseases of the musculoskeletal system and connective tissue                                     | 15             | 0.01          |
| 2018          | XV      | Pregnancy, childbirth and the puerperium                                                         | 12             | 0.01          |
| 2017          | VIII    | Diseases of the ear and mastoid process                                                          | 10             | 0.00          |
| 2017          | XVI     | Certain conditions originating in the perinatal period                                           | 10             | 0.00          |
| 2017          | XV      | Pregnancy, childbirth and the puerperium                                                         | 9              | 0.00          |
| 2019          | XVII    | Congenital malformations, deformations and chromosomal abnormalities                             | 7              | 0.00          |
| 2016          | VIII    | Diseases of the ear and mastoid process                                                          | 6              | 0.00          |
| 2016          | XV      | Pregnancy, childbirth and the puerperium                                                         | 6              | 0.00          |
| 2018          | VIII    | Diseases of the ear and mastoid process                                                          | 6              | 0.00          |
| 2019          | XV      | Pregnancy, childbirth and the puerperium                                                         | 2              | 0.00          |
| 2016          | VII     | Diseases of the eye and adnexa                                                                   | 1              | 0.00          |
| <b>Total</b>  |         |                                                                                                  | <b>236 681</b> | <b>100.00</b> |

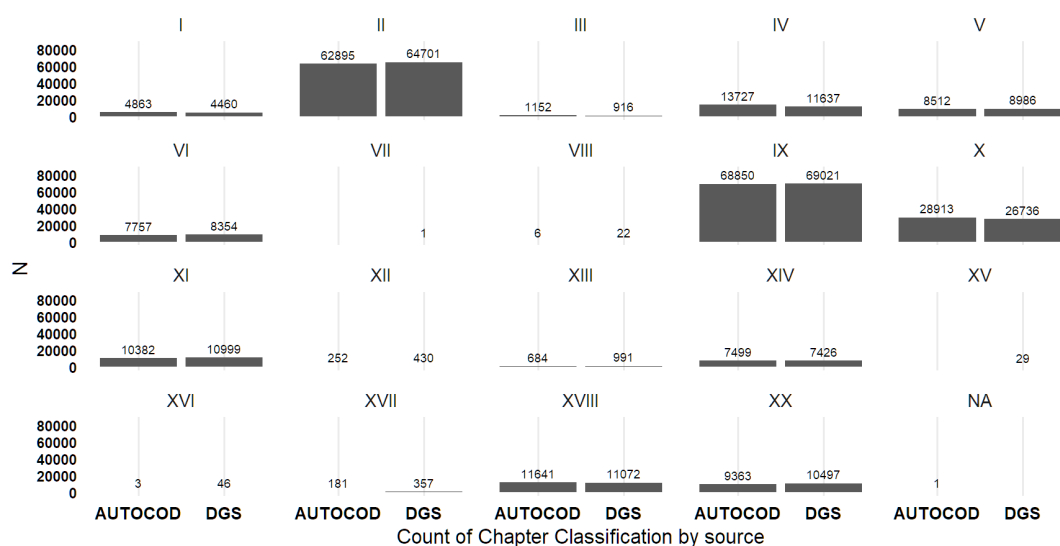

Supplementary Figure 8 - Count of death certificates classified either by human coders (DGS) or by AUTOCOD, for periods without excess mortality

Supplementary Table 25 - Confusion Matrix for the periods without excess mortality

|         |       | Human Coders (GOLD-STANDARD) |           |         |          |          |          |     |      |           |           |          |         |         |          |        |     |      |           |          |
|---------|-------|------------------------------|-----------|---------|----------|----------|----------|-----|------|-----------|-----------|----------|---------|---------|----------|--------|-----|------|-----------|----------|
|         |       | I                            | II        | III     | IV       | V        | VI       | VII | VIII | IX        | X         | XI       | XII     | XIII    | XIV      | XV     | XVI | XVII | XVIII     | XX       |
| AUTOCOD | I     | 298<br>4                     | 195       | 40      | 141      | 89       | 92       | 0   | 2    | 313       | 148       | 301      | 14<br>8 | 60      | 172      | 0      | 4   | 14   | 47        | 113      |
|         | II    | 150                          | 6148<br>6 | 29      | 82       | 86       | 69       | 0   | 1    | 281       | 155       | 264      | 9       | 24      | 80       | 2      | 2   | 11   | 31        | 133      |
|         | III   | 27                           | 173       | 52<br>6 | 35       | 21       | 25       | 0   | 2    | 128       | 32        | 77       | 5       | 12      | 40       | 2      | 3   | 6    | 2         | 36       |
|         | IV    | 163                          | 316       | 35      | 939<br>9 | 231      | 209      | 0   | 4    | 1715      | 364       | 313      | 33      | 98      | 485      | 5      | 8   | 31   | 72        | 246      |
|         | V     | 49                           | 90        | 9       | 144      | 695<br>6 | 225      | 0   | 0    | 378       | 391       | 44       | 10      | 13      | 86       | 0      | 0   | 1    | 36        | 80       |
|         | VI    | 62                           | 151       | 20      | 97       | 79       | 663<br>4 | 0   | 2    | 275       | 166       | 61       | 3       | 21      | 33       | 0      | 4   | 19   | 20        | 110      |
|         | VII   | 0                            | 0         | 0       | 0        | 0        | 0        | 0   | 0    | 0         | 0         | 0        | 0       | 0       | 0        | 0      | 0   | 0    | 0         | 0        |
|         | VIII  | 0                            | 0         | 0       | 1        | 0        | 1        | 0   | 4    | 0         | 0         | 0        | 0       | 0       | 0        | 0      | 0   | 0    | 0         | 0        |
|         | IX    | 173                          | 616       | 93      | 822      | 543      | 330      | 0   | 4    | 6300<br>1 | 1048      | 536      | 42      | 11<br>4 | 467      | 1<br>5 | 3   | 65   | 381       | 597      |
|         | X     | 343                          | 637       | 69      | 364      | 601      | 442      | 0   | 1    | 1205      | 2396<br>9 | 216      | 22      | 15<br>7 | 241      | 2      | 5   | 33   | 143       | 463      |
|         | XI    | 304                          | 401       | 35      | 105      | 37       | 37       | 0   | 0    | 320       | 71        | 882<br>6 | 6       | 15      | 71       | 1      | 2   | 8    | 10        | 133      |
|         | XII   | 27                           | 12        | 1       | 17       | 5        | 3        | 0   | 0    | 27        | 1         | 16       | 11<br>9 | 3       | 6        | 0      | 0   | 0    | 1         | 14       |
|         | XIII  | 29                           | 37        | 11      | 17       | 7        | 16       | 0   | 0    | 45        | 18        | 16       | 1       | 41<br>4 | 11       | 1      | 2   | 4    | 3         | 52       |
|         | XIV   | 77                           | 293       | 21      | 249      | 182      | 125      | 0   | 0    | 502       | 101       | 160      | 20      | 16      | 566<br>5 | 0      | 1   | 12   | 9         | 66       |
|         | XV    | 0                            | 0         | 0       | 0        | 0        | 0        | 0   | 0    | 0         | 0         | 0        | 0       | 0       | 0        | 0      | 0   | 0    | 0         | 0        |
|         | XVI   | 0                            | 0         | 0       | 0        | 0        | 0        | 0   | 0    | 0         | 0         | 0        | 0       | 0       | 0        | 0      | 3   | 0    | 0         | 0        |
|         | XVII  | 2                            | 3         | 0       | 2        | 0        | 6        | 0   | 0    | 13        | 2         | 5        | 1       | 0       | 3        | 0      | 0   | 138  | 1         | 5        |
|         | XVIII | 35                           | 124       | 6       | 113      | 91       | 60       | 1   | 2    | 451       | 173       | 67       | 7       | 12      | 32       | 0      | 0   | 7    | 1025<br>8 | 202      |
|         | XX    | 35                           | 167       | 21      | 49       | 58       | 80       | 0   | 0    | 367       | 97        | 97       | 4       | 32      | 34       | 1      | 9   | 7    | 58        | 824<br>7 |

Caption: I - Certain infectious and parasitic diseases; II - Neoplasms; III - Diseases of the blood and blood-forming organs and certain disorders involving the immune system; IV - Endocrine, nutritional and metabolic diseases; V - Mental and behavioural disorders; VI - Diseases of the nervous system; VII - Diseases of the eye and adnexa; VIII - Diseases of the ear and mastoid process; IX - Diseases of the circulatory system; X - Diseases of the respiratory system; XI - Diseases of the digestive system; XII - Diseases of the skin and subcutaneous tissue; XIII - Diseases of the musculoskeletal system and connective tissue; XIV - Diseases of the genitourinary system; XV - Pregnancy, childbirth and the puerperium; XVI - Certain conditions originating in the perinatal period; XVII - Congenital malformations, deformations and chromosomal abnormalities; XVIII - Symptoms, signs and abnormal clinical and laboratory findings, not elsewhere specified; XIX - Injury, poisoning and certain other consequences of external causes; XX - External causes of morbidity and mortality

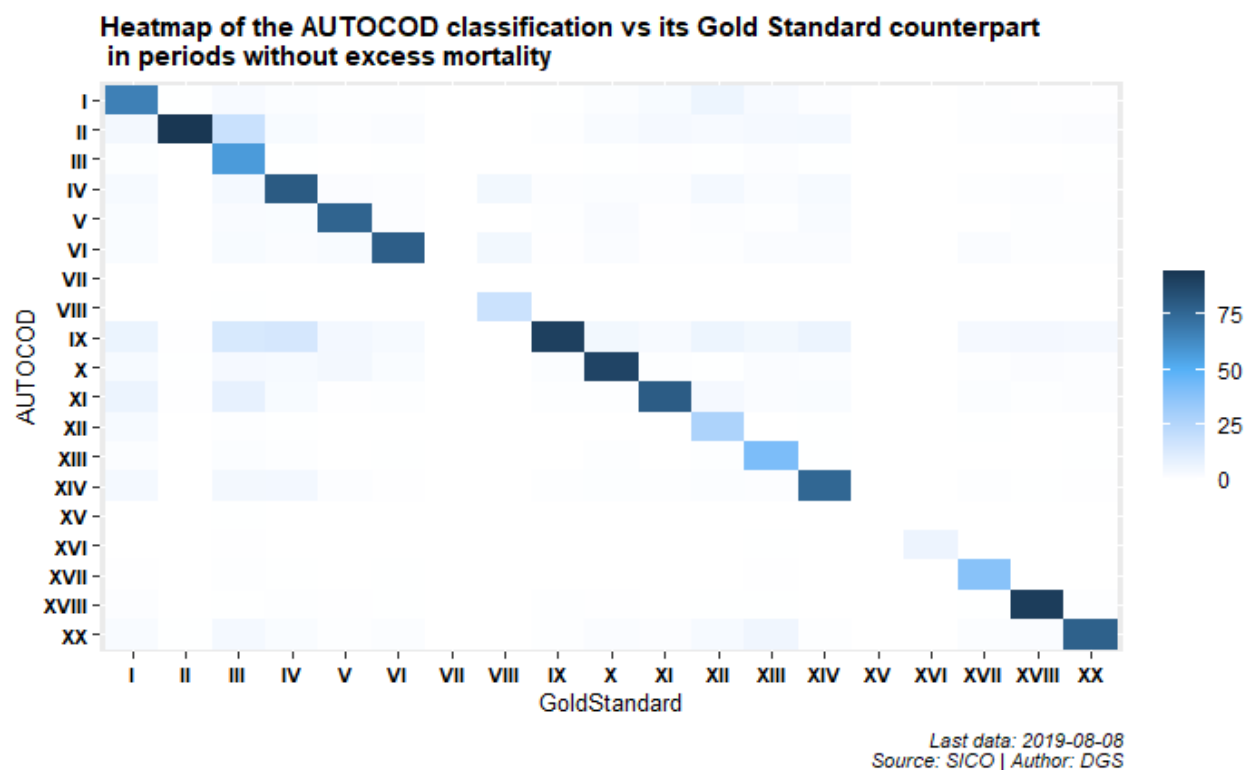

Supplementary Figure 9 - Heatmap of the AUTOCOD classification vs its Gold Standard counterpart in periods without excess mortality. Values on the diagonal represent correct classifications.

Caption: I - Certain infectious and parasitic diseases; II - Neoplasms; III - Diseases of the blood and blood-forming organs and certain disorders involving the immune system; IV - Endocrine, nutritional and metabolic diseases; V - Mental and behavioural disorders; VI - Diseases of the nervous system; VII - Diseases of the eye and adnexa; VIII - Diseases of the ear and mastoid process; IX - Diseases of the circulatory system; X - Diseases of the respiratory system; XI - Diseases of the digestive system; XII - Diseases of the skin and subcutaneous tissue; XIII - Diseases of the musculoskeletal system and connective tissue; XIV - Diseases of the genitourinary system; XV - Pregnancy, childbirth and the puerperium; XVI - Certain conditions originating in the perinatal period; XVII - Congenital malformations, deformations and chromosomal abnormalities; XVIII - Symptoms, signs and abnormal clinical and laboratory findings, not elsewhere specified; XIX - Injury, poisoning and certain other consequences of external causes; XX - External causes of morbidity and mortality

Supplementary Table 26 - Overall performance metrics of AUTOCOD during periods without excess mortality

|                       |      |
|-----------------------|------|
| <b>Accuracy</b>       | 0.88 |
| <b>Kappa</b>          | 0.86 |
| <b>AccuracyLower</b>  | 0.88 |
| <b>AccuracyUpper</b>  | 0.88 |
| <b>AccuracyNull</b>   | 0.29 |
| <b>AccuracyPValue</b> | 0.00 |

Supplementary Table 27 - Performance Metrics of AUTOCOD, by class, for the periods without excess mortality

| Chapter      | Sensitivity | Specificity | Pos Pred Value | Neg Pred Value | F1   | Prevalence | Detection Rate | Detection Prevalence | Balanced Accuracy |
|--------------|-------------|-------------|----------------|----------------|------|------------|----------------|----------------------|-------------------|
| <b>I</b>     | 0.67        | 0.99        | 0.61           | 0.99           | 0.64 | 0.02       | 0.01           | 0.02                 | 0.83              |
| <b>II</b>    | 0.95        | 0.99        | 0.98           | 0.98           | 0.96 | 0.27       | 0.26           | 0.27                 | 0.97              |
| <b>III</b>   | 0.57        | 1.00        | 0.46           | 1.00           | 0.51 | 0.00       | 0.00           | 0.01                 | 0.79              |
| <b>IV</b>    | 0.81        | 0.98        | 0.69           | 0.99           | 0.74 | 0.05       | 0.04           | 0.06                 | 0.89              |
| <b>V</b>     | 0.77        | 0.99        | 0.82           | 0.99           | 0.80 | 0.04       | 0.03           | 0.04                 | 0.88              |
| <b>VI</b>    | 0.79        | 1.00        | 0.86           | 0.99           | 0.82 | 0.04       | 0.03           | 0.03                 | 0.90              |
| <b>VII</b>   | 0.00        | 1.00        | NaN            | 1.00           | NA   | 0.00       | 0.00           | 0.00                 | 0.50              |
| <b>VIII</b>  | 0.18        | 1.00        | 0.67           | 1.00           | 0.29 | 0.00       | 0.00           | 0.00                 | 0.59              |
| <b>IX</b>    | 0.91        | 0.97        | 0.92           | 0.96           | 0.91 | 0.29       | 0.27           | 0.29                 | 0.94              |
| <b>X</b>     | 0.90        | 0.98        | 0.83           | 0.99           | 0.86 | 0.11       | 0.10           | 0.12                 | 0.94              |
| <b>XI</b>    | 0.80        | 0.99        | 0.85           | 0.99           | 0.83 | 0.05       | 0.04           | 0.04                 | 0.90              |
| <b>XII</b>   | 0.28        | 1.00        | 0.47           | 1.00           | 0.35 | 0.00       | 0.00           | 0.00                 | 0.64              |
| <b>XIII</b>  | 0.42        | 1.00        | 0.61           | 1.00           | 0.49 | 0.00       | 0.00           | 0.00                 | 0.71              |
| <b>XIV</b>   | 0.76        | 0.99        | 0.76           | 0.99           | 0.76 | 0.03       | 0.02           | 0.03                 | 0.88              |
| <b>XV</b>    | 0.00        | 1.00        | NaN            | 1.00           | NA   | 0.00       | 0.00           | 0.00                 | 0.50              |
| <b>XVI</b>   | 0.07        | 1.00        | 1.00           | 1.00           | 0.12 | 0.00       | 0.00           | 0.00                 | 0.53              |
| <b>XVII</b>  | 0.39        | 1.00        | 0.76           | 1.00           | 0.51 | 0.00       | 0.00           | 0.00                 | 0.69              |
| <b>XVIII</b> | 0.93        | 0.99        | 0.88           | 1.00           | 0.90 | 0.05       | 0.04           | 0.05                 | 0.96              |
| <b>XX</b>    | 0.79        | 1.00        | 0.88           | 0.99           | 0.83 | 0.04       | 0.04           | 0.04                 | 0.89              |

Caption: I - Certain infectious and parasitic diseases; II - Neoplasms; III - Diseases of the blood and blood-forming organs and certain disorders involving the immune system; IV - Endocrine, nutritional and metabolic diseases; V - Mental and behavioural disorders; VI - Diseases of the nervous system; VII - Diseases of the eye and adnexa; VIII - Diseases of the ear and mastoid process; IX - Diseases of the circulatory system; X - Diseases of the respiratory system; XI - Diseases of the digestive system; XII - Diseases of the skin and subcutaneous tissue; XIII - Diseases of the musculoskeletal system and connective tissue; XIV - Diseases of the genitourinary system; XV - Pregnancy, childbirth and the puerperium; XVI - Certain conditions originating in the perinatal period; XVII - Congenital malformations, deformations and chromosomal abnormalities; XVIII - Symptoms, signs and abnormal clinical and laboratory findings, not elsewhere specified; XIX - Injury, poisoning and certain other consequences of external causes; XX - External causes of morbidity and mortality

## Periods with severe excess mortality (>4 SDs)

Supplementary Table 28 - Confusion Matrix for the periods with severe excess mortality (>4 SDs)

|         |       | Human Coders (GOLD-STANDARD) |          |        |          |         |         |     |      |          |          |         |     |      |     |    |     |      |       |     |         |
|---------|-------|------------------------------|----------|--------|----------|---------|---------|-----|------|----------|----------|---------|-----|------|-----|----|-----|------|-------|-----|---------|
|         |       | I                            | II       | III    | IV       | V       | VI      | VII | VIII | IX       | X        | XI      | XII | XIII | XIV | XV | XVI | XVII | XVIII | XIX | XX      |
| AUTOCOD | I     | 36<br>6                      | 18       | 1      | 17       | 7       | 10      | 0   | 0    | 35       | 27       | 36      | 8   | 6    | 14  | 0  | 0   | 0    | 7     | 0   | 14      |
|         | II    | 10                           | 574<br>6 | 8      | 14       | 6       | 12      | 0   | 1    | 56       | 17       | 37      | 1   | 3    | 11  | 0  | 0   | 1    | 3     | 0   | 15      |
|         | III   | 1                            | 10       | 8<br>0 | 3        | 3       | 1       | 0   | 0    | 18       | 4        | 7       | 1   | 0    | 9   | 0  | 3   | 1    | 1     | 0   | 8       |
|         | IV    | 24                           | 35       | 5      | 128<br>7 | 36      | 38      | 0   | 0    | 218      | 87       | 38      | 4   | 11   | 52  | 0  | 0   | 2    | 11    | 0   | 32      |
|         | V     | 16                           | 8        | 1      | 21       | 98<br>1 | 37      | 0   | 0    | 52       | 67       | 4       | 0   | 3    | 14  | 0  | 0   | 0    | 6     | 0   | 11      |
|         | VI    | 7                            | 12       | 0      | 11       | 16      | 86<br>7 | 0   | 0    | 38       | 39       | 6       | 1   | 2    | 5   | 0  | 0   | 1    | 3     | 0   | 16      |
|         | VII   | 0                            | 0        | 0      | 0        | 0       | 0       | 0   | 0    | 0        | 0        | 0       | 0   | 0    | 0   | 0  | 0   | 0    | 0     | 0   | 0       |
|         | VIII  | 0                            | 0        | 0      | 0        | 0       | 0       | 0   | 2    | 0        | 0        | 0       | 0   | 0    | 0   | 0  | 0   | 0    | 0     | 0   | 1       |
|         | IX    | 19                           | 77       | 1<br>4 | 132      | 92      | 52      | 0   | 0    | 841<br>6 | 167      | 78      | 3   | 14   | 67  | 2  | 0   | 10   | 71    | 0   | 82      |
|         | X     | 52                           | 76       | 1<br>3 | 56       | 76      | 49      | 0   | 1    | 188      | 423<br>7 | 32      | 2   | 24   | 27  | 0  | 0   | 4    | 27    | 1   | 69      |
|         | XI    | 28                           | 44       | 9      | 10       | 5       | 6       | 0   | 0    | 45       | 14       | 91<br>4 | 0   | 4    | 9   | 0  | 1   | 4    | 2     | 0   | 13      |
|         | XII   | 3                            | 1        | 0      | 0        | 3       | 0       | 0   | 0    | 1        | 1        | 0       | 15  | 1    | 2   | 0  | 0   | 0    | 0     | 0   | 1       |
|         | XIII  | 1                            | 5        | 1      | 1        | 1       | 2       | 0   | 1    | 9        | 5        | 5       | 1   | 54   | 2   | 0  | 0   | 0    | 1     | 0   | 7       |
|         | XIV   | 9                            | 24       | 1      | 24       | 16      | 7       | 0   | 0    | 81       | 21       | 27      | 0   | 4    | 704 | 0  | 0   | 2    | 3     | 0   | 4       |
|         | XV    | 0                            | 0        | 0      | 0        | 0       | 0       | 0   | 0    | 0        | 0        | 0       | 0   | 0    | 0   | 0  | 0   | 0    | 0     | 0   | 0       |
|         | XVI   | 0                            | 0        | 0      | 0        | 0       | 0       | 0   | 0    | 0        | 0        | 0       | 0   | 0    | 0   | 0  | 0   | 0    | 0     | 0   | 0       |
|         | XVII  | 0                            | 0        | 0      | 0        | 1       | 1       | 0   | 0    | 1        | 1        | 1       | 0   | 0    | 0   | 0  | 0   | 12   | 0     | 0   | 0       |
|         | XVIII | 6                            | 20       | 3      | 16       | 16      | 9       | 0   | 0    | 80       | 30       | 4       | 0   | 0    | 4   | 0  | 1   | 0    | 1657  | 0   | 33      |
|         | XIX   | 0                            | 0        | 0      | 0        | 0       | 0       | 0   | 0    | 0        | 0        | 0       | 0   | 0    | 0   | 0  | 0   | 0    | 0     | 0   | 0       |
|         | XX    | 4                            | 12       | 3      | 2        | 5       | 6       | 0   | 0    | 49       | 17       | 12      | 2   | 4    | 4   | 0  | 0   | 1    | 10    | 1   | 90<br>8 |

Caption: I - Certain infectious and parasitic diseases; II - Neoplasms; III - Diseases of the blood and blood-forming organs and certain disorders involving the immune system; IV - Endocrine, nutritional and metabolic diseases; V - Mental and behavioural disorders; VI - Diseases of the nervous system; VII - Diseases of the eye and adnexa; VIII - Diseases of the ear and mastoid process; IX - Diseases of the circulatory system; X - Diseases of the respiratory system; XI - Diseases of the digestive system; XII - Diseases of the skin and subcutaneous tissue; XIII - Diseases of the musculoskeletal system and connective tissue; XIV - Diseases of the genitourinary system; XV - Pregnancy, childbirth and the puerperium; XVI - Certain conditions originating in the perinatal period; XVII - Congenital malformations, deformations and chromosomal abnormalities; XVIII - Symptoms, signs and abnormal clinical and laboratory findings, not elsewhere specified; XIX - Injury, poisoning and certain other consequences of external causes; XX - External causes of morbidity and mortality

Heatmap of the AUTOCOD classification vs its Gold Standard counterpart severe excess mortality >4 SD

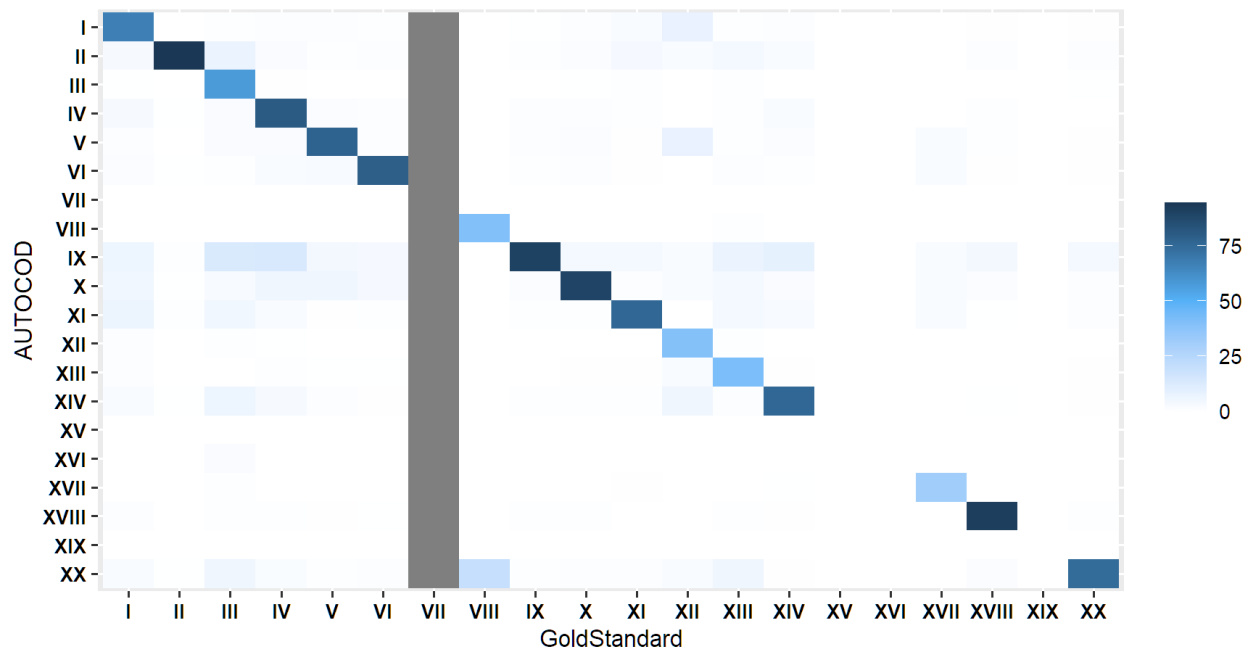

Last data: 2019-08-08  
Source: SICO | Author: DGS

Supplementary Figure 10 - Heatmap of the AUTOCOD classification vs its Gold Standard counterpart in periods with severe excess mortality (> 4SDs). Values on the diagonal represent correct classifications.

Caption: I - Certain infectious and parasitic diseases; II - Neoplasms; III - Diseases of the blood and blood-forming organs and certain disorders involving the immune system; IV - Endocrine, nutritional and metabolic diseases; V - Mental and behavioural disorders; VI - Diseases of the nervous system; VII - Diseases of the eye and adnexa; VIII - Diseases of the ear and mastoid process; IX - Diseases of the circulatory system; X - Diseases of the respiratory system; XI - Diseases of the digestive system; XII - Diseases of the skin and subcutaneous tissue; XIII - Diseases of the musculoskeletal system and connective tissue; XIV - Diseases of the genitourinary system; XV - Pregnancy, childbirth and the puerperium; XVI - Certain conditions originating in the perinatal period; XVII - Congenital malformations, deformations and chromosomal abnormalities; XVIII - Symptoms, signs and abnormal clinical and laboratory findings, not elsewhere specified; XIX - Injury, poisoning and certain other consequences of external causes; XX - External causes of morbidity and mortality

Supplementary Table 29 - Overall performance metrics of AUTOCOD during periods with severe excess mortality (>4 SDs)

|                       |      |
|-----------------------|------|
| <b>Accuracy</b>       | 0.87 |
| <b>Kappa</b>          | 0.84 |
| <b>AccuracyLower</b>  | 0.87 |
| <b>AccuracyUpper</b>  | 0.88 |
| <b>AccuracyNull</b>   | 0.31 |
| <b>AccuracyPValue</b> | 0.00 |

Table 1 - Performance Metrics of AUTOCOD, by class, during periods with severe excess mortality (>4 SDs)

| Chapter | Sensitivity | Specificity | Pos Pred Value | Neg Pred Value | F1   | Prevalence | Detection Rate | Detection Prevalence | Balanced Accuracy |
|---------|-------------|-------------|----------------|----------------|------|------------|----------------|----------------------|-------------------|
| I       | 0.67        | 0.99        | 0.65           | 0.99           | 0.66 | 0.02       | 0.01           | 0.02                 | 0.83              |
| II      | 0.94        | 0.99        | 0.97           | 0.99           | 0.96 | 0.20       | 0.19           | 0.20                 | 0.97              |
| III     | 0.58        | 1.00        | 0.53           | 1.00           | 0.55 | 0.01       | 0.00           | 0.01                 | 0.79              |
| IV      | 0.81        | 0.98        | 0.69           | 0.99           | 0.74 | 0.05       | 0.04           | 0.06                 | 0.89              |
| V       | 0.78        | 0.99        | 0.80           | 0.99           | 0.79 | 0.04       | 0.03           | 0.04                 | 0.88              |
| VI      | 0.79        | 1.00        | 0.85           | 0.99           | 0.82 | 0.04       | 0.03           | 0.03                 | 0.89              |
| VII     | NA          | 1.00        | NA             | NA             | NA   | 0.00       | 0.00           | 0.00                 | NA                |
| VIII    | 0.40        | 1.00        | 0.67           | 1.00           | 0.50 | 0.00       | 0.00           | 0.00                 | 0.70              |
| IX      | 0.91        | 0.96        | 0.91           | 0.96           | 0.91 | 0.31       | 0.28           | 0.31                 | 0.93              |
| X       | 0.90        | 0.97        | 0.86           | 0.98           | 0.88 | 0.16       | 0.14           | 0.16                 | 0.93              |
| XI      | 0.76        | 0.99        | 0.83           | 0.99           | 0.79 | 0.04       | 0.03           | 0.04                 | 0.88              |
| XII     | 0.40        | 1.00        | 0.54           | 1.00           | 0.46 | 0.00       | 0.00           | 0.00                 | 0.70              |
| XIII    | 0.42        | 1.00        | 0.56           | 1.00           | 0.48 | 0.00       | 0.00           | 0.00                 | 0.71              |
| XIV     | 0.76        | 0.99        | 0.76           | 0.99           | 0.76 | 0.03       | 0.02           | 0.03                 | 0.88              |
| XV      | 0.00        | 1.00        | NA             | 1.00           | NA   | 0.00       | 0.00           | 0.00                 | 0.50              |
| XVI     | 0.00        | 1.00        | NA             | 1.00           | NA   | 0.00       | 0.00           | 0.00                 | 0.50              |
| XVII    | 0.32        | 1.00        | 0.71           | 1.00           | 0.44 | 0.00       | 0.00           | 0.00                 | 0.66              |
| XVIII   | 0.92        | 0.99        | 0.88           | 1.00           | 0.90 | 0.06       | 0.06           | 0.06                 | 0.96              |
| XIX     | 0.00        | 1.00        | NA             | 1.00           | NA   | 0.00       | 0.00           | 0.00                 | 0.50              |
| XX      | 0.75        | 1.00        | 0.87           | 0.99           | 0.81 | 0.04       | 0.03           | 0.04                 | 0.87              |

Caption: I - Certain infectious and parasitic diseases; II - Neoplasms; III - Diseases of the blood and blood-forming organs and certain disorders involving the immune system; IV - Endocrine, nutritional and metabolic diseases; V - Mental and behavioural disorders; VI - Diseases of the nervous system; VII - Diseases of the eye and adnexa; VIII - Diseases of the ear and mastoid process; IX - Diseases of the circulatory system; X - Diseases of the respiratory system; XI - Diseases of the digestive system; XII - Diseases of the skin and subcutaneous tissue; XIII - Diseases of the musculoskeletal system and connective tissue; XIV - Diseases of the genitourinary system; XV - Pregnancy, childbirth and the puerperium; XVI - Certain conditions originating in the perinatal period; XVII - Congenital malformations, deformations and chromosomal abnormalities; XVIII - Symptoms, signs and abnormal clinical and laboratory findings, not elsewhere specified; XIX - Injury, poisoning and certain other consequences of external causes; XX - External causes of morbidity and mortality

Periods with extreme excess mortality (>6 SDs)

Supplementary Table 30 - Confusion Matrix for the periods with extreme excess mortality (>6 SDs)

|         |      | Human Coders (GOLD-STANDARD) |     |     |     |    |    |     |      |    |    |    |     |      |     |    |     |      |       |     |    |    |
|---------|------|------------------------------|-----|-----|-----|----|----|-----|------|----|----|----|-----|------|-----|----|-----|------|-------|-----|----|----|
|         |      | I                            | II  | III | IV  | V  | VI | VII | VIII | IX | X  | XI | XII | XIII | XIV | XV | XVI | XVII | XVIII | XIX | XX |    |
| AUTOCOD | I    | 7                            |     |     |     |    |    |     |      |    |    |    |     |      |     |    |     |      |       |     |    |    |
|         |      | 2                            | 1   | 0   | 5   | 1  | 3  | 0   | 0    | 10 | 7  | 7  | 0   | 2    | 4   | 0  | 0   | 0    | 2     | 0   | 3  |    |
|         | II   |                              | 111 |     |     |    |    |     |      |    |    |    |     |      |     |    |     |      |       |     |    |    |
|         |      | 0                            | 2   | 4   | 1   | 2  | 2  | 0   | 0    | 11 | 7  | 14 | 1   | 1    | 2   | 0  | 0   | 1    | 0     | 0   | 4  |    |
|         | III  |                              |     |     |     |    |    |     |      |    |    |    |     |      |     |    |     |      |       |     |    |    |
|         |      | 0                            | 2   | 9   | 1   | 0  | 0  | 0   | 0    | 4  | 1  | 1  | 1   | 0    | 5   | 0  | 0   | 0    | 0     | 0   | 1  |    |
|         | IV   |                              |     |     |     |    |    |     |      |    |    |    |     |      |     |    |     |      |       |     |    |    |
|         |      | 5                            | 6   | 1   | 25  | 8  | 9  | 10  | 0    | 0  | 36 | 22 | 4   | 0    | 1   | 10 | 0   | 0    | 1     | 4   | 0  | 7  |
|         | V    |                              |     |     |     |    |    |     |      |    |    |    |     |      |     |    |     |      |       |     |    |    |
|         |      | 4                            | 2   | 0   | 21  | 3  | 6  | 8   | 0    | 0  | 13 | 9  | 0   | 0    | 0   | 1  | 0   | 0    | 0     | 1   | 0  | 4  |
|         | VI   |                              |     |     |     |    |    |     |      |    |    |    |     |      |     |    |     |      |       |     |    |    |
|         |      | 1                            | 1   | 0   | 20  | 2  | 2  | 0   | 0    | 0  | 5  | 13 | 0   | 0    | 1   | 0  | 0   | 0    | 0     | 1   | 0  | 2  |
|         | VII  |                              |     |     |     |    |    |     |      |    |    |    |     |      |     |    |     |      |       |     |    |    |
|         |      | 0                            | 0   | 0   | 0   | 0  | 0  | 0   | 0    | 0  | 0  | 0  | 0   | 0    | 0   | 0  | 0   | 0    | 0     | 0   | 0  | 0  |
|         | VIII |                              |     |     |     |    |    |     |      |    |    |    |     |      |     |    |     |      |       |     |    |    |
|         |      | 0                            | 0   | 0   | 0   | 0  | 0  | 0   | 0    | 0  | 0  | 0  | 0   | 0    | 0   | 0  | 0   | 0    | 0     | 0   | 0  | 0  |
|         | IX   |                              |     |     |     |    |    |     |      |    |    |    |     |      |     |    |     |      |       |     |    |    |
|         |      | 5                            | 13  | 3   | 175 | 23 | 18 | 15  | 0    | 0  | 0  | 30 | 10  | 1    | 4   | 11 | 1   | 0    | 5     | 27  | 0  | 21 |
|         | X    |                              |     |     |     |    |    |     |      |    |    |    |     |      |     |    |     |      |       |     |    |    |
|         |      | 1                            | 14  | 4   | 90  | 9  | 20 | 11  | 0    | 0  | 40 | 5  | 5   | 0    | 6   | 6  | 0   | 0    | 1     | 6   | 0  | 11 |
| XI      |      |                              |     |     |     |    |    |     |      |    |    |    |     |      |     |    |     |      |       |     |    |    |
|         | 6    | 7                            | 1   | 16  | 1   | 2  | 0  | 0   | 0    | 8  | 0  | 5  | 0   | 0    | 2   | 0  | 0   | 0    | 0     | 0   | 3  |    |
| XII     |      |                              |     |     |     |    |    |     |      |    |    |    |     |      |     |    |     |      |       |     |    |    |
|         | 0    | 0                            | 0   | 0   | 0   | 0  | 0  | 0   | 0    | 0  | 0  | 0  | 1   | 0    | 2   | 0  | 0   | 0    | 0     | 0   | 0  |    |
| XIII    |      |                              |     |     |     |    |    |     |      |    |    |    |     |      |     |    |     |      |       |     |    |    |
|         | 0    | 0                            | 0   | 0   | 0   | 1  | 0  | 0   | 0    | 1  | 3  | 1  | 0   | 9    | 1   | 0  | 0   | 0    | 0     | 0   | 2  |    |
| XIV     |      |                              |     |     |     |    |    |     |      |    |    |    |     |      |     |    |     |      |       |     |    |    |
|         | 3    | 1                            | 0   | 133 | 5   | 3  | 1  | 0   | 0    | 14 | 4  | 6  | 0   | 2    | 133 | 0  | 0   | 0    | 1     | 0   | 1  |    |
| XV      |      |                              |     |     |     |    |    |     |      |    |    |    |     |      |     |    |     |      |       |     |    |    |
|         | 0    | 0                            | 0   | 0   | 0   | 0  | 0  | 0   | 0    | 0  | 0  | 0  | 0   | 0    | 0   | 0  | 0   | 0    | 0     | 0   | 0  |    |
| XVI     |      |                              |     |     |     |    |    |     |      |    |    |    |     |      |     |    |     |      |       |     |    |    |
|         | 0    | 0                            | 0   | 0   | 0   | 0  | 0  | 0   | 0    | 0  | 0  | 0  | 0   | 0    | 0   | 0  | 0   | 0    | 0     | 0   | 0  |    |
| XVII    |      |                              |     |     |     |    |    |     |      |    |    |    |     |      |     |    |     |      |       |     |    |    |
|         | 0    | 0                            | 0   | 0   | 0   | 0  | 0  | 0   | 0    | 0  | 0  | 1  | 0   | 0    | 0   | 0  | 0   | 2    | 0     | 0   | 0  |    |
| XVIII   |      |                              |     |     |     |    |    |     |      |    |    |    |     |      |     |    |     |      |       |     |    |    |
|         | 1    | 5                            | 0   | 401 | 5   | 7  | 1  | 0   | 0    | 18 | 9  | 1  | 0   | 0    | 0   | 0  | 0   | 0    | 401   | 0   | 6  |    |
| XIX     |      |                              |     |     |     |    |    |     |      |    |    |    |     |      |     |    |     |      |       |     |    |    |
|         | 0    | 0                            | 0   | 0   | 0   | 0  | 0  | 0   | 0    | 0  | 0  | 0  | 0   | 0    | 0   | 0  | 0   | 0    | 0     | 0   | 0  |    |
| XX      |      |                              |     |     |     |    |    |     |      |    |    |    |     |      |     |    |     |      |       |     |    |    |
|         | 2    | 2                            | 0   | 20  | 0   | 1  | 2  | 0   | 0    | 8  | 4  | 2  | 1   | 2    | 2   | 0  | 0   | 0    | 5     | 0   | 8  |    |

Caption: I - Certain infectious and parasitic diseases; II - Neoplasms; III - Diseases of the blood and blood-forming organs and certain disorders involving the immune system; IV - Endocrine, nutritional and metabolic diseases; V - Mental and behavioural disorders; VI - Diseases of the nervous system; VII - Diseases of the eye and adnexa; VIII - Diseases of the ear and mastoid process; IX - Diseases of the circulatory system; X - Diseases of the respiratory system; XI - Diseases of the digestive system; XII - Diseases of the skin and subcutaneous tissue; XIII - Diseases of the musculoskeletal system and connective tissue; XIV - Diseases of the genitourinary system; XV - Pregnancy, childbirth and the puerperium; XVI - Certain conditions originating in the perinatal period; XVII - Congenital malformations, deformations and chromosomal abnormalities; XVIII - Symptoms, signs and abnormal clinical and laboratory findings, not elsewhere specified; XIX - Injury, poisoning and certain other consequences of external causes; XX - External causes of morbidity and mortality



**Heatmap of the AUTOCOD classification vs its Gold Standard counterpart extreme excess mortality >6 SD**

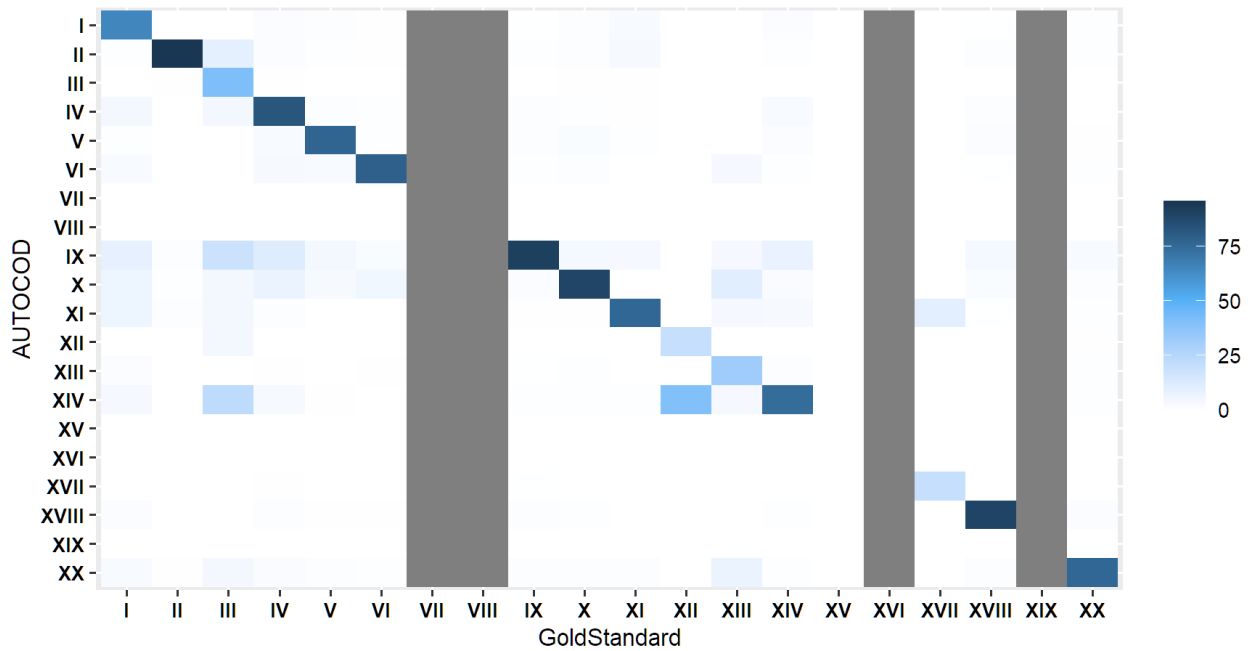

Last data: 2019-08-08  
Source: SICO | Author: DGS

Supplementary Figure 11 - Heatmap of the AUTOCOD classification vs its Gold Standard counterpart in periods with extreme excess mortality (>6 SDs). Values on the diagonal represent correct classifications.

Caption: I - Certain infectious and parasitic diseases; II - Neoplasms; III - Diseases of the blood and blood-forming organs and certain disorders involving the immune system; IV - Endocrine, nutritional and metabolic diseases; V - Mental and behavioural disorders; VI - Diseases of the nervous system; VII - Diseases of the eye and adnexa; VIII - Diseases of the ear and mastoid process; IX - Diseases of the circulatory system; X - Diseases of the respiratory system; XI - Diseases of the digestive system; XII - Diseases of the skin and subcutaneous tissue; XIII - Diseases of the musculoskeletal system and connective tissue; XIV - Diseases of the genitourinary system; XV - Pregnancy, childbirth and the puerperium; XVI - Certain conditions originating in the perinatal period; XVII - Congenital malformations, deformations and chromosomal abnormalities; XVIII - Symptoms, signs and abnormal clinical and laboratory findings, not elsewhere specified; XIX - Injury, poisoning and certain other consequences of external causes; XX - External causes of morbidity and mortality

Supplementary Table 31 - Overall performance metrics of AUTOCOD during periods with extreme excess mortality (>6 SDs)

|                       |      |
|-----------------------|------|
| <b>Accuracy</b>       | 0.87 |
| <b>Kappa</b>          | 0.85 |
| <b>AccuracyLower</b>  | 0.86 |
| <b>AccuracyUpper</b>  | 0.88 |
| <b>AccuracyNull</b>   | 0.31 |
| <b>AccuracyPValue</b> | 0.00 |

Supplementary Table 32 - Performance Metrics of AUTOCOD, by class, during periods with extreme excess mortality (>6 SDs)

| Chapter | Sensitivity | Specificity | Pos Pred Value | Neg Pred Value | F1   | Prevalence | Detection Rate | Detection Prevalence | Balanced Accuracy |
|---------|-------------|-------------|----------------|----------------|------|------------|----------------|----------------------|-------------------|
| I       | 0.65        | 0.99        | 0.62           | 0.99           | 0.63 | 0.02       | 0.01           | 0.02                 | 0.82              |
| II      | 0.95        | 0.99        | 0.96           | 0.99           | 0.96 | 0.19       | 0.18           | 0.19                 | 0.97              |
| III     | 0.41        | 1.00        | 0.36           | 1.00           | 0.38 | 0.00       | 0.00           | 0.00                 | 0.70              |
| IV      | 0.82        | 0.98        | 0.69           | 0.99           | 0.75 | 0.05       | 0.04           | 0.06                 | 0.90              |
| V       | 0.77        | 0.99        | 0.83           | 0.99           | 0.80 | 0.05       | 0.04           | 0.04                 | 0.88              |
| VI      | 0.79        | 1.00        | 0.88           | 0.99           | 0.83 | 0.04       | 0.03           | 0.04                 | 0.89              |
| VII     | NA          | 1.00        | NA             | NA             | NA   | 0.00       | 0.00           | 0.00                 | NA                |
| VIII    | NA          | 1.00        | NA             | NA             | NA   | 0.00       | 0.00           | 0.00                 | NA                |
| IX      | 0.91        | 0.96        | 0.96           | 0.96           | 0.91 | 0.31       | 0.28           | 0.31                 | 0.94              |
| X       | 0.89        | 0.97        | 0.86           | 0.98           | 0.88 | 0.16       | 0.15           | 0.17                 | 0.93              |
| XI      | 0.76        | 1.00        | 0.85           | 0.99           | 0.80 | 0.04       | 0.03           | 0.03                 | 0.88              |
| XII     | 0.20        | 1.00        | 0.33           | 1.00           | 0.25 | 0.00       | 0.00           | 0.00                 | 0.60              |
| XIII    | 0.32        | 1.00        | 0.50           | 1.00           | 0.39 | 0.00       | 0.00           | 0.00                 | 0.66              |
| XIV     | 0.74        | 0.99        | 0.76           | 0.99           | 0.75 | 0.03       | 0.02           | 0.03                 | 0.87              |
| XV      | 0.00        | 1.00        | NA             | 1.00           | NA   | 0.00       | 0.00           | 0.00                 | 0.50              |
| XVI     | NA          | 1.00        | NA             | NA             | NA   | 0.00       | 0.00           | 0.00                 | NA                |
| XVII    | 0.20        | 1.00        | 0.67           | 1.00           | 0.31 | 0.00       | 0.00           | 0.00                 | 0.60              |
| XVIII   | 0.90        | 0.99        | 0.88           | 0.99           | 0.89 | 0.07       | 0.06           | 0.07                 | 0.94              |
| XIX     | NA          | 1.00        | NA             | NA             | NA   | 0.00       | 0.00           | 0.00                 | NA                |
| XX      | 0.76        | 1.00        | 0.87           | 0.99           | 0.81 | 0.04       | 0.03           | 0.04                 | 0.88              |

Caption: I - Certain infectious and parasitic diseases; II - Neoplasms; III - Diseases of the blood and blood-forming organs and certain disorders involving the immune system; IV - Endocrine, nutritional and metabolic diseases; V - Mental and behavioural disorders; VI - Diseases of the nervous system; VII - Diseases of the eye and adnexa; VIII - Diseases of the ear and mastoid process; IX - Diseases of the circulatory system; X - Diseases of the respiratory system; XI - Diseases of the digestive system; XII - Diseases of the skin and subcutaneous tissue; XIII - Diseases of the musculoskeletal system and connective tissue; XIV - Diseases of the genitourinary system; XV - Pregnancy, childbirth and the puerperium; XVI - Certain conditions originating in the perinatal period; XVII - Congenital malformations, deformations and chromosomal abnormalities; XVIII - Symptoms, signs and abnormal clinical and laboratory findings, not elsewhere specified; XIX - Injury, poisoning and certain other consequences of external causes; XX - External causes of morbidity and mortality

Difference between excess mortality periods and periods without excess mortality

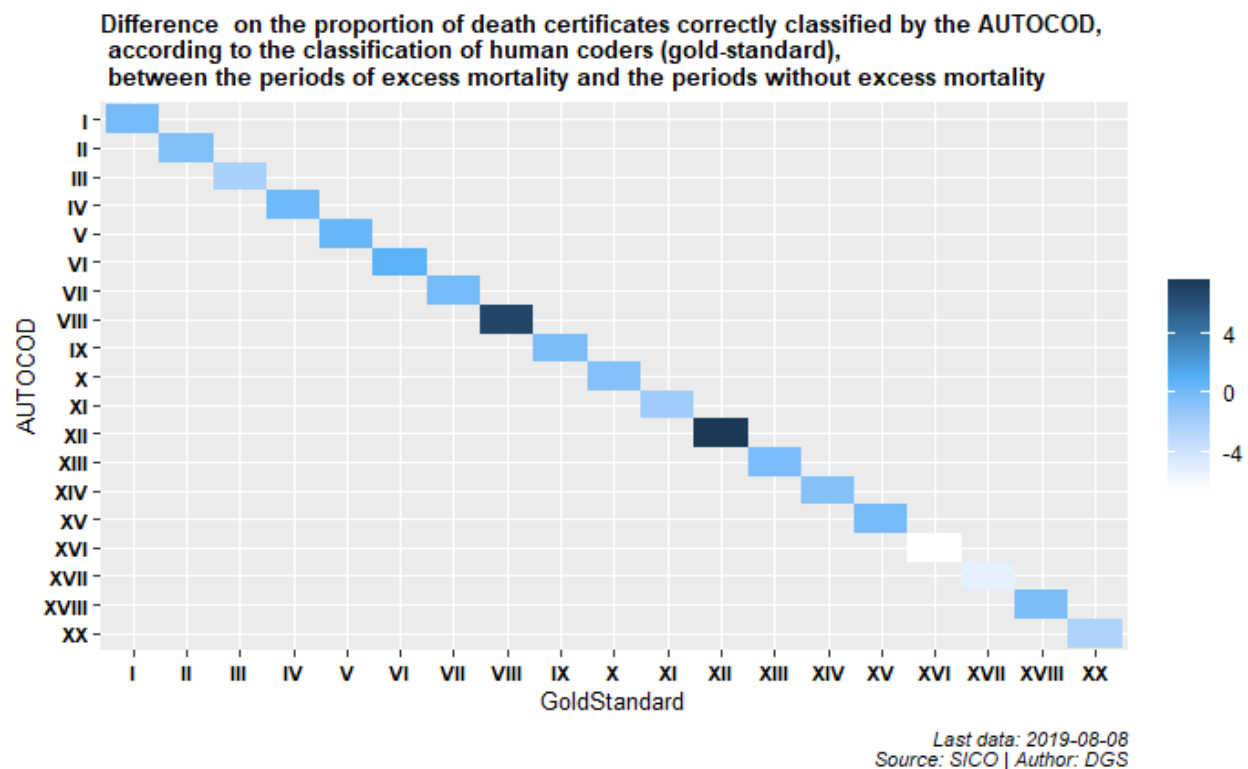

Supplementary Figure 12 - Difference on the proportion of death certificates correctly classified by the AUTOCOD, according to the classification of human coders (gold-standard), between the periods of excess mortality and the periods without excess mortality

Caption: I - Certain infectious and parasitic diseases; II - Neoplasms; III - Diseases of the blood and blood-forming organs and certain disorders involving the immune system; IV - Endocrine, nutritional and metabolic diseases; V - Mental and behavioural disorders; VI - Diseases of the nervous system; VII - Diseases of the eye and adnexa; VIII - Diseases of the ear and mastoid process; IX - Diseases of the circulatory system; X - Diseases of the respiratory system; XI - Diseases of the digestive system; XII - Diseases of the skin and subcutaneous tissue; XIII - Diseases of the musculoskeletal system and connective tissue; XIV - Diseases of the genitourinary system; XV - Pregnancy, childbirth and the puerperium; XVI - Certain conditions originating in the perinatal period; XVII - Congenital malformations, deformations and chromosomal abnormalities; XVIII - Symptoms, signs and abnormal clinical and laboratory findings, not elsewhere specified; XIX - Injury, poisoning and certain other consequences of external causes; XX - External causes of morbidity and mortality

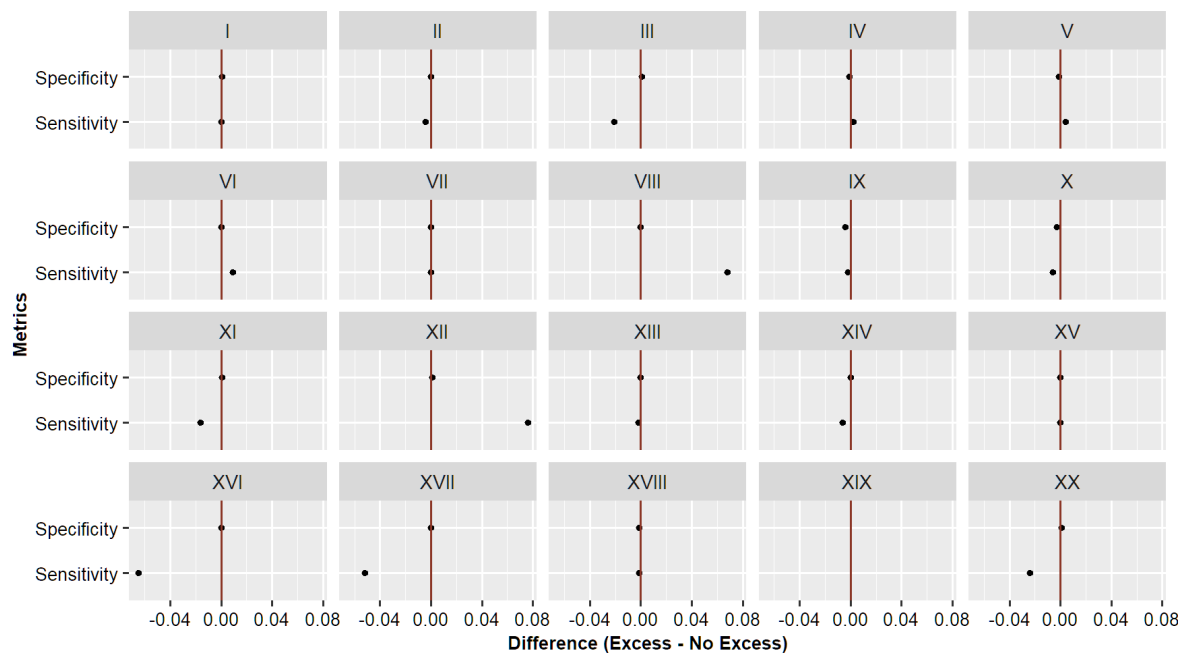

Supplementary Figure 13 - Difference on performance metrics of AUTOCOD, by chapter, between periods of excess mortality and periods without excess mortality

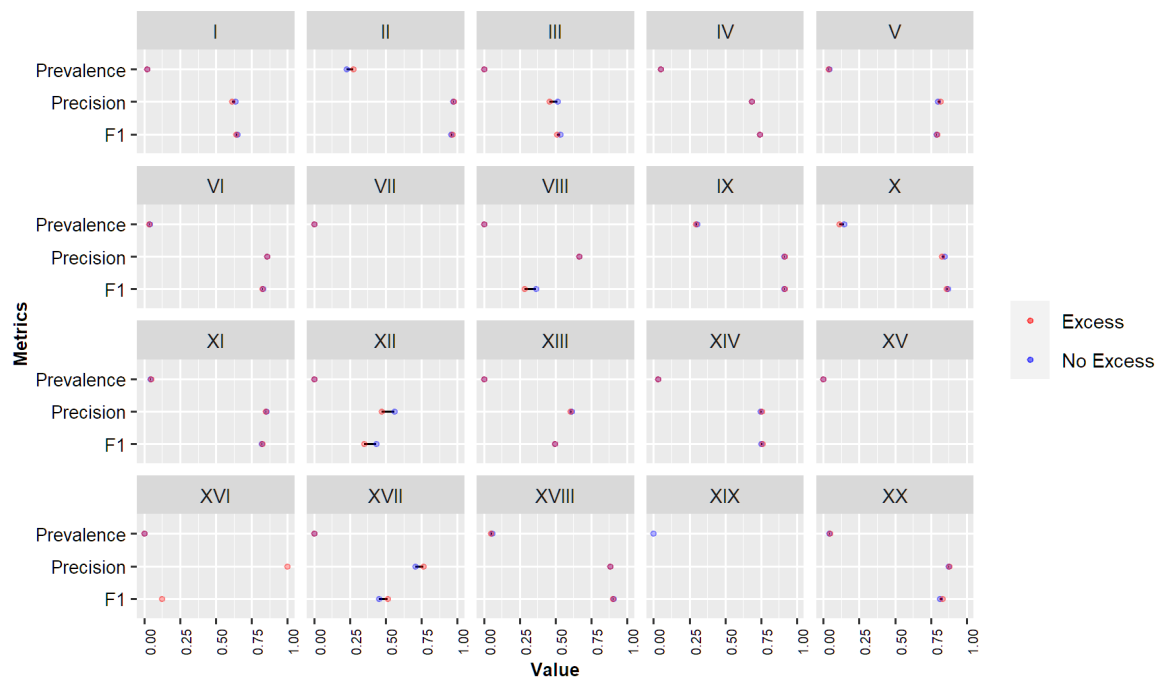

Supplementary Figure 14 - Comparison between other performance metrics of AUTOCOD during periods of excess mortality and periods without excess mortality

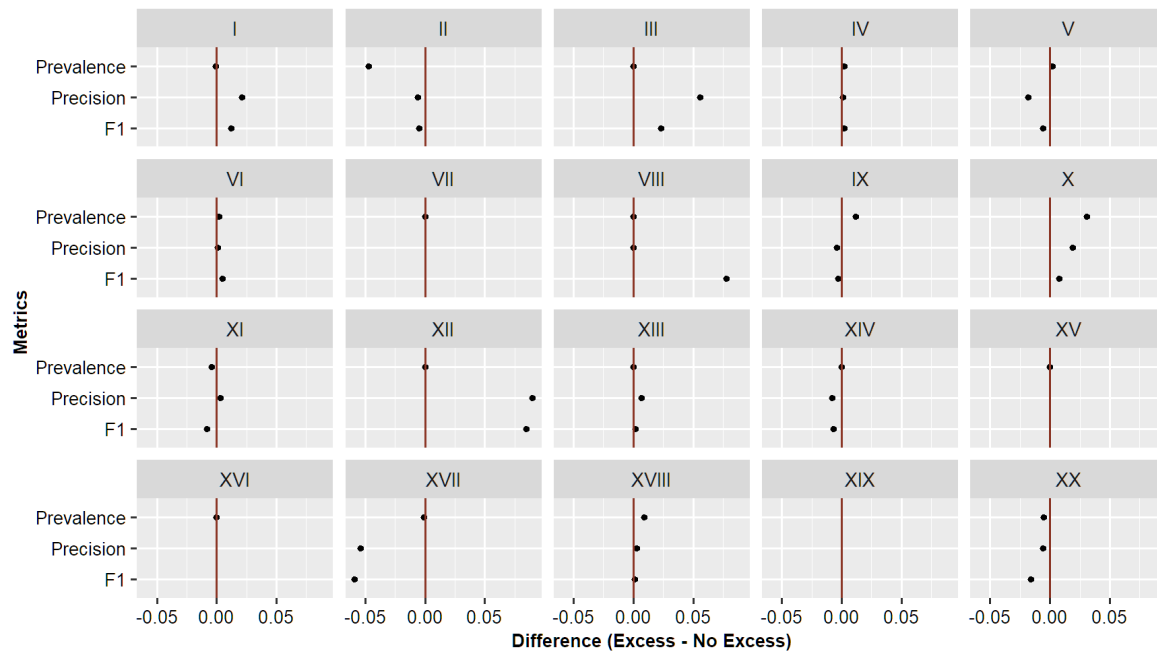

Supplementary Figure 15 - Difference on other performance metrics of AUTOCOD, by chapter, between periods of excess mortality and periods without excess mortality

**Difference on the proportion of death certificates correctly classified by the AUTOCOD, according to the classification of human coders (gold-standard), between the periods of severe excess mortality (>4 SD) and the periods without excess mortality**

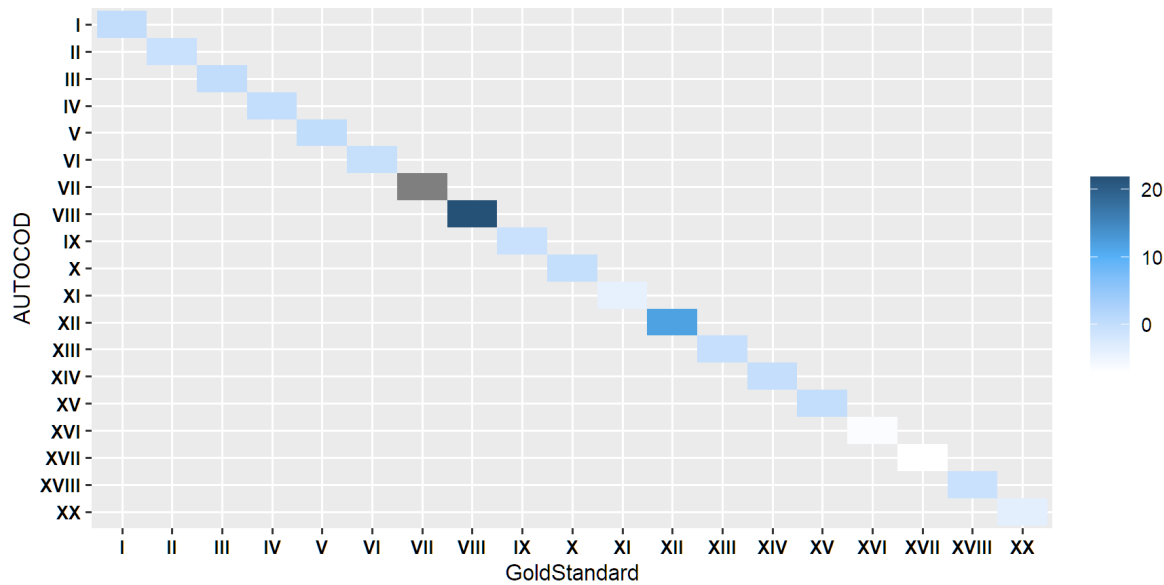

Last data: 2019-08-08  
Source: SICO | Author: DGS

Supplementary Figure 16 - Difference on the proportion of death certificates correctly classified by the AUTOCOD, according to the classification of human coders (gold-standard), between the periods of severe excess mortality (>4 SDs) and the periods without excess mortality

Caption: I - Certain infectious and parasitic diseases; II - Neoplasms; III - Diseases of the blood and blood-forming organs and certain disorders involving the immune system; IV - Endocrine, nutritional and metabolic diseases; V - Mental and behavioural disorders; VI - Diseases of the nervous system; VII - Diseases of the eye and adnexa; VIII - Diseases of the ear and mastoid process; IX - Diseases of the circulatory system; X - Diseases of the respiratory system; XI - Diseases of the digestive system; XII - Diseases of the skin and subcutaneous tissue; XIII - Diseases of the musculoskeletal system and connective tissue; XIV - Diseases of the genitourinary system; XV - Pregnancy, childbirth and the puerperium; XVI - Certain conditions originating in the perinatal period; XVII - Congenital malformations, deformations and chromosomal abnormalities; XVIII - Symptoms, signs and abnormal clinical and laboratory findings, not elsewhere specified; XIX - Injury, poisoning and certain other consequences of external causes; XX - External causes of morbidity and mortality

**Difference on the proportion of death certificates correctly classified by the AUTOCOD, according to the classification of human coders (gold-standard), between the periods of extreme excess mortality (>6 SD) and the periods without excess mortality**

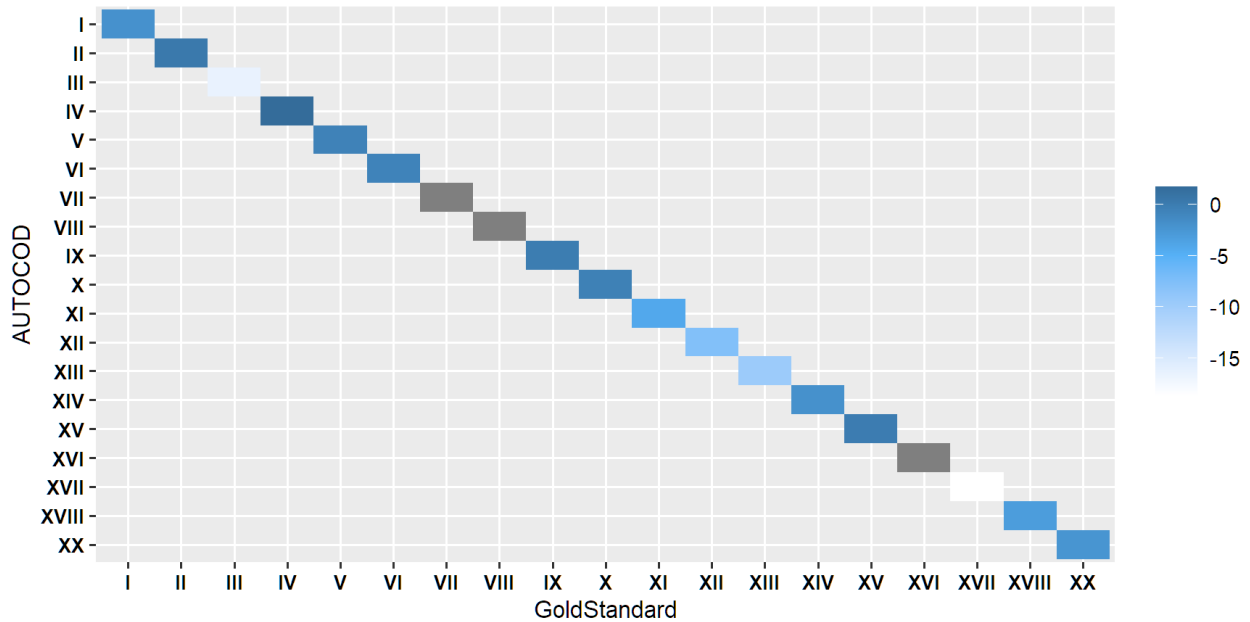

Last data: 2019-08-08  
Source: SICO | Author: DGS

Supplementary Figure 17 - Difference on the proportion of death certificates correctly classified by the AUTOCOD, according to the classification of human coders (gold-standard), between the periods of extreme excess mortality (> 6 SDs) and the periods without excess mortality.

Caption: I - Certain infectious and parasitic diseases; II - Neoplasms; III - Diseases of the blood and blood-forming organs and certain disorders involving the immune system; IV - Endocrine, nutritional and metabolic diseases; V - Mental and behavioural disorders; VI - Diseases of the nervous system; VII - Diseases of the eye and adnexa; VIII - Diseases of the ear and mastoid process; IX - Diseases of the circulatory system; X - Diseases of the respiratory system; XI - Diseases of the digestive system; XII - Diseases of the skin and subcutaneous tissue; XIII - Diseases of the musculoskeletal system and connective tissue; XIV - Diseases of the genitourinary system; XV - Pregnancy, childbirth and the puerperium; XVI - Certain conditions originating in the perinatal period; XVII - Congenital malformations, deformations and chromosomal abnormalities; XVIII - Symptoms, signs and abnormal clinical and laboratory findings, not elsewhere specified; XIX - Injury, poisoning and certain other consequences of external causes; XX - External causes of morbidity and mortality

### Metrics in periods of severe excess mortality >4 SD and periods without excess mortality

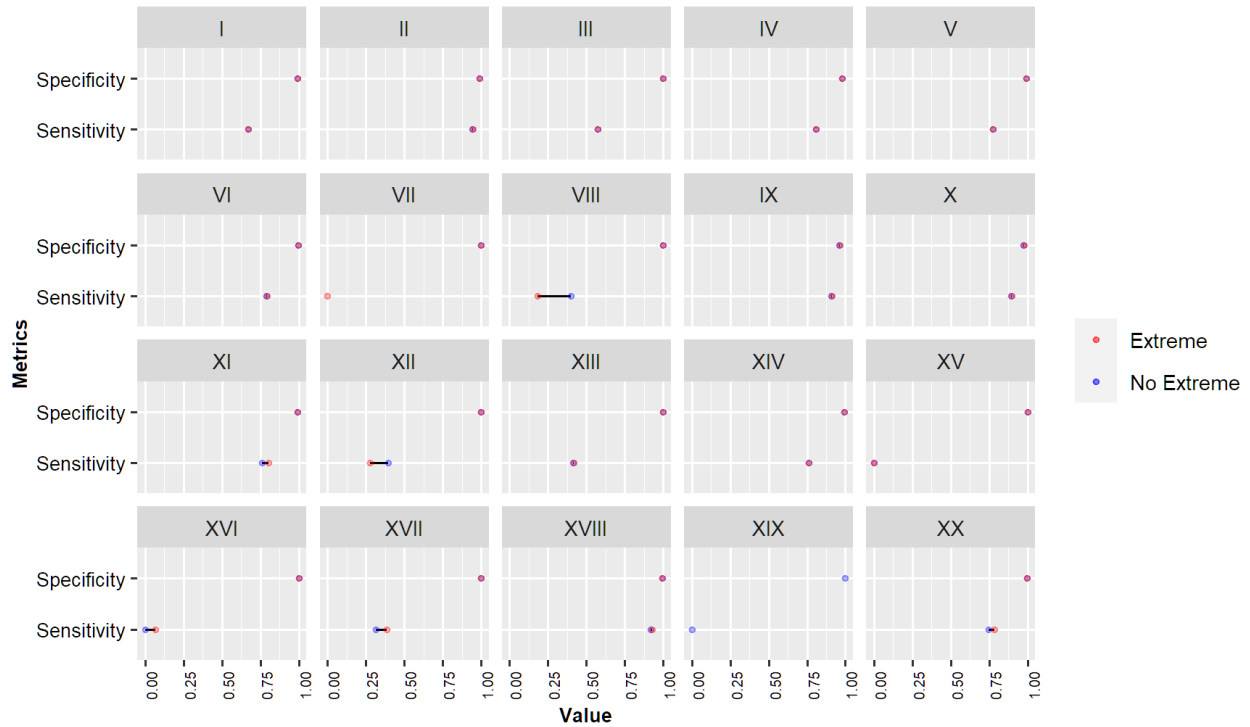

Supplementary Figure 18 - Comparison between performance metrics of AUTOCOD during periods of severe excess mortality (>4 SDs) and periods without excess mortality

Caption: I - Certain infectious and parasitic diseases; II - Neoplasms; III - Diseases of the blood and blood-forming organs and certain disorders involving the immune system; IV - Endocrine, nutritional and metabolic diseases; V - Mental and behavioural disorders; VI - Diseases of the nervous system; VII - Diseases of the eye and adnexa; VIII - Diseases of the ear and mastoid process; IX - Diseases of the circulatory system; X - Diseases of the respiratory system; XI - Diseases of the digestive system; XII - Diseases of the skin and subcutaneous tissue; XIII - Diseases of the musculoskeletal system and connective tissue; XIV - Diseases of the genitourinary system; XV - Pregnancy, childbirth and the puerperium; XVI - Certain conditions originating in the perinatal period; XVII - Congenital malformations, deformations and chromosomal abnormalities; XVIII - Symptoms, signs and abnormal clinical and laboratory findings, not elsewhere specified; XIX - Injury, poisoning and certain other consequences of external causes; XX - External causes of morbidity and mortality

### Metrics in periods of extreme excess mortality >6 SD and periods without excess mortality

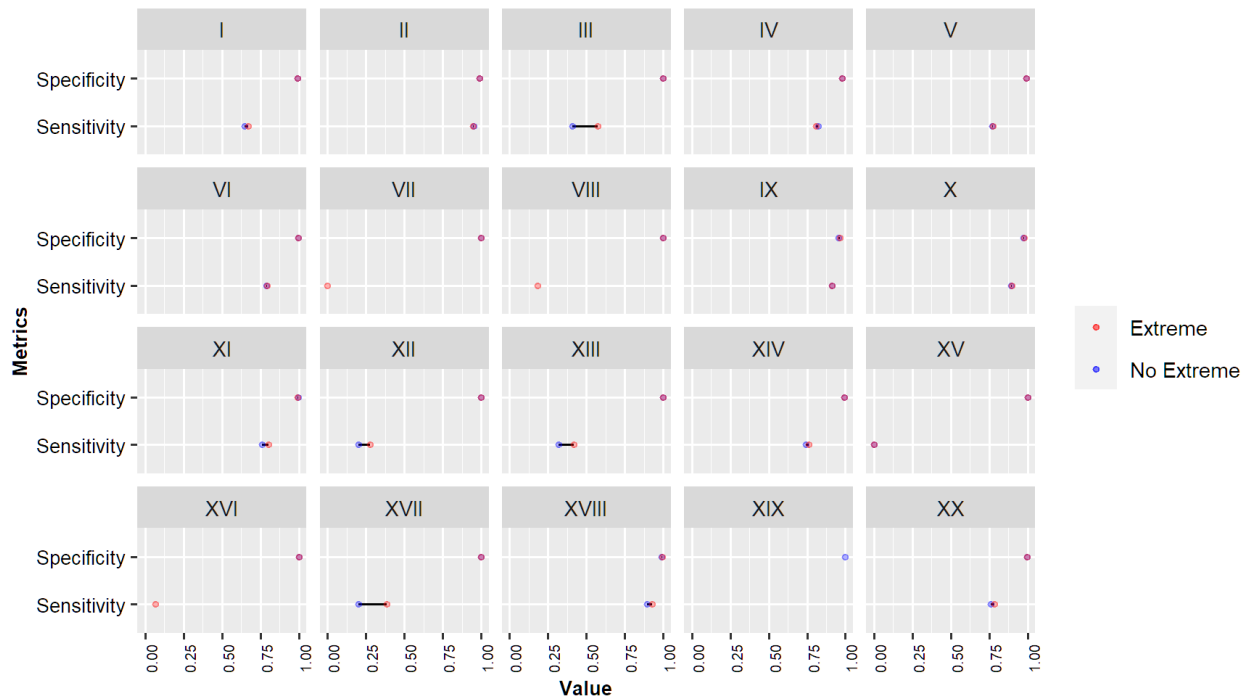

Supplementary Figure 19 - Comparison between performance metrics of AUTOCOD during periods of extreme excess mortality (>6 SDs) and periods without excess mortality

Caption: I - Certain infectious and parasitic diseases; II - Neoplasms; III - Diseases of the blood and blood-forming organs and certain disorders involving the immune system; IV - Endocrine, nutritional and metabolic diseases; V - Mental and behavioural disorders; VI - Diseases of the nervous system; VII - Diseases of the eye and adnexa; VIII - Diseases of the ear and mastoid process; IX - Diseases of the circulatory system; X - Diseases of the respiratory system; XI - Diseases of the digestive system; XII - Diseases of the skin and subcutaneous tissue; XIII - Diseases of the musculoskeletal system and connective tissue; XIV - Diseases of the genitourinary system; XV - Pregnancy, childbirth and the puerperium; XVI - Certain conditions originating in the perinatal period; XVII - Congenital malformations, deformations and chromosomal abnormalities; XVIII - Symptoms, signs and abnormal clinical and laboratory findings, not elsewhere specified; XIX - Injury, poisoning and certain other consequences of external causes; XX - External causes of morbidity and mortality



# ICD-10 block analysis

## Performance metrics – global overview

Supplementary Table 33 - Performance Metrics of AUTOCOD, by block, for all the periods analysed

|     | C00-C97    |              |              |               | D00-D09    |              |              |               | D10-D36    |              |              |               | D37-D48    |              |              |               | I05-I09    |              |              |               |
|-----|------------|--------------|--------------|---------------|------------|--------------|--------------|---------------|------------|--------------|--------------|---------------|------------|--------------|--------------|---------------|------------|--------------|--------------|---------------|
|     | No Excess. | Excess Mort. | Severe >4 SD | Extreme >6 SD | No Excess. | Excess Mort. | Severe >4 SD | Extreme >6 SD | No Excess. | Excess Mort. | Severe >4 SD | Extreme >6 SD | No Excess. | Excess Mort. | Severe >4 SD | Extreme >6 SD | No Excess. | Excess Mort. | Severe >4 SD | Extreme >6 SD |
| Sen | 0.98       | 0.98         | 0.97         | 0.97          | 0.00       | NA           | NA           | NA            | 0.70       | 0.69         | 0.72         | 0.80          | 0.74       | 0.73         | 0.74         | 0.77          | 0.41       | 0.49         | 0.63         | 0.67          |
| Spe | 0.99       | 0.99         | 0.99         | 0.99          | 1.00       | 1.00         | 1.00         | 1.00          | 1.00       | 1.00         | 1.00         | 1.00          | 1.00       | 1.00         | 1.00         | 1.00          | 1.00       | 1.00         | 1.00         | 1.00          |
| PPV | 0.99       | 0.99         | 0.99         | 0.99          | NaN        | NA           | NA           | NA            | 0.76       | 0.84         | 0.93         | 1.00          | 0.83       | 0.82         | 0.76         | 0.54          | 0.51       | 0.53         | 0.57         | 0.50          |
| NPV | 0.99       | 0.99         | 0.99         | 0.99          | 1.00       | NA           | NA           | NA            | 1.00       | 1.00         | 1.00         | 1.00          | 1.00       | 1.00         | 1.00         | 1.00          | 1.00       | 1.00         | 1.00         | 1.00          |
| F1  | 0.99       | 0.98         | 0.98         | 0.98          | NA         | NA           | NA           | NA            | 0.73       | 0.76         | 0.81         | 0.89          | 0.78       | 0.77         | 0.75         | 0.63          | 0.45       | 0.51         | 0.60         | 0.57          |
| Pre | 0.40       | 0.34         | 0.30         | 0.29          | 0.00       | 0.00         | 0.00         | 0.00          | 0.00       | 0.00         | 0.00         | 0.00          | 0.01       | 0.01         | 0.01         | 0.00          | 0.00       | 0.00         | 0.00         | 0.00          |
| DR  | 0.40       | 0.33         | 0.30         | 0.28          | 0.00       | 0.00         | 0.00         | 0.00          | 0.00       | 0.00         | 0.00         | 0.00          | 0.01       | 0.00         | 0.00         | 0.00          | 0.00       | 0.00         | 0.00         | 0.00          |
| DP  | 0.40       | 0.33         | 0.30         | 0.28          | 0.00       | 0.00         | 0.00         | 0.00          | 0.00       | 0.00         | 0.00         | 0.00          | 0.01       | 0.01         | 0.01         | 0.01          | 0.00       | 0.00         | 0.00         | 0.00          |
| BA  | 0.99       | 0.99         | 0.98         | 0.98          | 0.50       | NA           | NA           | NA            | 0.85       | 0.84         | 0.86         | 0.90          | 0.87       | 0.86         | 0.87         | 0.88          | 0.70       | 0.75         | 0.82         | 0.83          |
|     | I10-I15    |              |              |               | I20-I25    |              |              |               | I26-I28    |              |              |               | I30-I52    |              |              |               | I60-I69    |              |              |               |
|     | No Excess. | Excess Mort. | Severe >4 SD | Extreme >6 SD | No Excess. | Excess Mort. | Severe >4 SD | Extreme >6 SD | No Excess. | Excess Mort. | Severe >4 SD | Extreme >6 SD | No Excess. | Excess Mort. | Severe >4 SD | Extreme >6 SD | No Excess. | Excess Mort. | Severe >4 SD | Extreme >6 SD |
| Sen | 0.85       | 0.86         | 0.87         | 0.87          | 0.93       | 0.92         | 0.92         | 0.92          | 0.80       | 0.79         | 0.77         | 0.80          | 0.91       | 0.92         | 0.92         | 0.92          | 0.94       | 0.94         | 0.93         | 0.93          |
| Spe | 0.99       | 0.99         | 0.99         | 0.99          | 0.99       | 0.99         | 0.99         | 0.99          | 1.00       | 1.00         | 1.00         | 1.00          | 0.99       | 0.99         | 0.98         | 0.99          | 0.99       | 0.99         | 0.99         | 0.99          |
| PPV | 0.76       | 0.76         | 0.78         | 0.78          | 0.94       | 0.93         | 0.95         | 0.93          | 0.81       | 0.82         | 0.80         | 0.78          | 0.90       | 0.90         | 0.89         | 0.90          | 0.95       | 0.95         | 0.96         | 0.96          |
| NPV | 1.00       | 1.00         | 1.00         | 1.00          | 0.99       | 0.99         | 0.99         | 0.99          | 1.00       | 1.00         | 1.00         | 1.00          | 0.99       | 0.99         | 0.99         | 0.99          | 0.99       | 0.99         | 0.99         | 0.99          |
| F1  | 0.80       | 0.81         | 0.82         | 0.82          | 0.93       | 0.93         | 0.94         | 0.93          | 0.80       | 0.80         | 0.78         | 0.79          | 0.90       | 0.91         | 0.91         | 0.91          | 0.95       | 0.95         | 0.95         | 0.94          |
| Pre | 0.03       | 0.04         | 0.04         | 0.03          | 0.09       | 0.10         | 0.11         | 0.12          | 0.01       | 0.01         | 0.01         | 0.01          | 0.11       | 0.12         | 0.12         | 0.13          | 0.15       | 0.15         | 0.16         | 0.15          |
| DR  | 0.03       | 0.03         | 0.03         | 0.03          | 0.09       | 0.09         | 0.10         | 0.11          | 0.01       | 0.01         | 0.01         | 0.01          | 0.10       | 0.11         | 0.11         | 0.12          | 0.14       | 0.14         | 0.15         | 0.14          |
| DP  | 0.04       | 0.04         | 0.04         | 0.04          | 0.09       | 0.10         | 0.10         | 0.11          | 0.01       | 0.01         | 0.01         | 0.01          | 0.11       | 0.13         | 0.13         | 0.13          | 0.15       | 0.15         | 0.15         | 0.15          |
| BA  | 0.92       | 0.92         | 0.93         | 0.93          | 0.96       | 0.96         | 0.96         | 0.96          | 0.90       | 0.89         | 0.88         | 0.90          | 0.95       | 0.95         | 0.95         | 0.95          | 0.97       | 0.97         | 0.96         | 0.96          |
|     | I70-I79    |              |              |               | I80-I89    |              |              |               | I95-I99    |              |              |               | J00-J06    |              |              |               | J09-J18    |              |              |               |
|     | No Excess. | Excess Mort. | Severe >4 SD | Extreme >6 SD | No Excess. | Excess Mort. | Severe >4 SD | Extreme >6 SD | No Excess. | Excess Mort. | Severe >4 SD | Extreme >6 SD | No Excess. | Excess Mort. | Severe >4 SD | Extreme >6 SD | No Excess. | Excess Mort. | Severe >4 SD | Extreme >6 SD |
| Sen | 0.82       | 0.82         | 0.85         | 0.84          | 0.55       | 0.54         | 0.58         | 0.50          | 0.08       | 0.00         | 0.00         | NA            | 0.41       | 0.07         | 0.00         | 0.00          | 0.94       | 0.93         | 0.93         | 0.93          |
| Spe | 1.00       | 1.00         | 1.00         | 1.00          | 1.00       | 1.00         | 1.00         | 1.00          | 1.00       | 1.00         | 1.00         | 1.00          | 1.00       | 1.00         | 1.00         | 1.00          | 0.99       | 0.99         | 0.99         | 0.99          |
| PPV | 0.89       | 0.88         | 0.88         | 0.91          | 0.75       | 0.76         | 0.83         | 1.00          | 0.20       | NaN          | NA           | NA            | 0.70       | 0.33         | 0.00         | NA            | 0.93       | 0.94         | 0.94         | 0.95          |
| NPV | 1.00       | 1.00         | 1.00         | 1.00          | 1.00       | 1.00         | 1.00         | 1.00          | 1.00       | 1.00         | 1.00         | NA            | 1.00       | 1.00         | 1.00         | 1.00          | 1.00       | 0.99         | 0.99         | 0.99          |
| F1  | 0.85       | 0.85         | 0.86         | 0.87          | 0.64       | 0.63         | 0.68         | 0.67          | 0.11       | NA           | NA           | NA            | 0.52       | 0.12         | NA           | NA            | 0.94       | 0.94         | 0.93         | 0.94          |
| Pre | 0.02       | 0.02         | 0.02         | 0.02          | 0.00       | 0.00         | 0.00         | 0.00          | 0.00       | 0.00         | 0.00         | 0.00          | 0.00       | 0.00         | 0.00         | 0.00          | 0.07       | 0.10         | 0.11         | 0.12          |
| DR  | 0.02       | 0.02         | 0.02         | 0.02          | 0.00       | 0.00         | 0.00         | 0.00          | 0.00       | 0.00         | 0.00         | 0.00          | 0.00       | 0.00         | 0.00         | 0.00          | 0.07       | 0.09         | 0.10         | 0.11          |
| DP  | 0.02       | 0.02         | 0.02         | 0.02          | 0.00       | 0.00         | 0.00         | 0.00          | 0.00       | 0.00         | 0.00         | 0.00          | 0.00       | 0.00         | 0.00         | 0.00          | 0.08       | 0.10         | 0.11         | 0.11          |
| BA  | 0.91       | 0.91         | 0.92         | 0.92          | 0.78       | 0.77         | 0.79         | 0.75          | 0.54       | 0.50         | 0.50         | NA            | 0.71       | 0.54         | 0.50         | 0.50          | 0.97       | 0.96         | 0.96         | 0.96          |
|     | J20-J22    |              |              |               | J30-J39    |              |              |               | J40-J47    |              |              |               | J60-J70    |              |              |               | J80-J84    |              |              |               |
|     | No Excess. | Excess Mort. | Severe >4 SD | Extreme >6 SD | No Excess. | Excess Mort. | Severe >4 SD | Extreme >6 SD | No Excess. | Excess Mort. | Severe >4 SD | Extreme >6 SD | No Excess. | Excess Mort. | Severe >4 SD | Extreme >6 SD | No Excess. | Excess Mort. | Severe >4 SD | Extreme >6 SD |
| Sen | 0.83       | 0.83         | 0.85         | 0.90          | 0.45       | 0.17         | 0.25         | NA            | 0.89       | 0.89         | 0.90         | 0.89          | 0.87       | 0.84         | 0.84         | 0.82          | 0.82       | 0.81         | 0.79         | 0.88          |
| Spe | 1.00       | 1.00         | 1.00         | 1.00          | 1.00       | 1.00         | 1.00         | 1.00          | 0.99       | 0.99         | 0.99         | 0.99          | 1.00       | 1.00         | 1.00         | 1.00          | 1.00       | 1.00         | 1.00         | 1.00          |
| PPV | 0.87       | 0.86         | 0.89         | 0.93          | 0.53       | 0.25         | 0.50         | NA            | 0.83       | 0.83         | 0.83         | 0.82          | 0.91       | 0.93         | 0.91         | 0.94          | 0.89       | 0.85         | 0.83         | 0.78          |
| NPV | 1.00       | 1.00         | 1.00         | 1.00          | 1.00       | 1.00         | 1.00         | NA            | 1.00       | 1.00         | 0.99         | 0.99          | 1.00       | 1.00         | 1.00         | 1.00          | 1.00       | 1.00         | 1.00         | 1.00          |
| F1  | 0.85       | 0.85         | 0.87         | 0.91          | 0.49       | 0.20         | 0.33         | NA            | 0.86       | 0.86         | 0.86         | 0.86          | 0.89       | 0.88         | 0.88         | 0.87          | 0.85       | 0.83         | 0.81         | 0.82          |
| Pre | 0.01       | 0.01         | 0.01         | 0.02          | 0.00       | 0.00         | 0.00         | 0.00          | 0.04       | 0.05         | 0.05         | 0.06          | 0.01       | 0.01         | 0.01         | 0.01          | 0.01       | 0.01         | 0.01         | 0.01          |
| DR  | 0.01       | 0.01         | 0.01         | 0.01          | 0.00       | 0.00         | 0.00         | 0.00          | 0.03       | 0.04         | 0.05         | 0.05          | 0.01       | 0.01         | 0.01         | 0.01          | 0.01       | 0.01         | 0.01         | 0.01          |
| DP  | 0.01       | 0.01         | 0.01         | 0.01          | 0.00       | 0.00         | 0.00         | 0.00          | 0.04       | 0.05         | 0.06         | 0.06          | 0.01       | 0.01         | 0.01         | 0.01          | 0.01       | 0.01         | 0.01         | 0.01          |
| BA  | 0.92       | 0.92         | 0.92         | 0.95          | 0.73       | 0.58         | 0.63         | NA            | 0.94       | 0.94         | 0.95         | 0.94          | 0.93       | 0.92         | 0.92         | 0.91          | 0.91       | 0.91         | 0.89         | 0.94          |
|     | J85-J86    |              |              |               | J90-J94    |              |              |               | J95-J99    |              |              |               |            |              |              |               |            |              |              |               |
|     | No Excess. | Excess Mort. | Severe >4 SD | Extreme >6 SD | No Excess. | Excess Mort. | Severe >4 SD | Extreme >6 SD | No Excess. | Excess Mort. | Severe >4 SD | Extreme >6 SD |            |              |              |               |            |              |              |               |
| Sen | 0.31       | 0.35         | 0.08         | 0.00          | 0.66       | 0.69         | 0.71         | 0.50          | 0.92       | 0.92         | 0.92         | 0.91          |            |              |              |               |            |              |              |               |
| Spe | 1.00       | 1.00         | 1.00         | 1.00          | 1.00       | 1.00         | 1.00         | 1.00          | 1.00       | 0.99         | 0.99         | 0.99          |            |              |              |               |            |              |              |               |
| PPV | 0.83       | 0.90         | 0.50         | NA            | 0.63       | 0.59         | 0.71         | 0.67          | 0.85       | 0.84         | 0.85         | 0.83          |            |              |              |               |            |              |              |               |
| NPV | 1.00       | 1.00         | 1.00         | 1.00          | 1.00       | 1.00         | 1.00         | 1.00          | 1.00       | 1.00         | 1.00         | 1.00          |            |              |              |               |            |              |              |               |
| F1  | 0.46       | 0.51         | 0.14         | NA            | 0.65       | 0.64         | 0.71         | 0.57          | 0.88       | 0.88         | 0.88         | 0.87          |            |              |              |               |            |              |              |               |
| Pre | 0.00       | 0.00         | 0.00         | 0.00          | 0.00       | 0.00         | 0.00         | 0.00          | 0.03       | 0.03         | 0.03         | 0.04          |            |              |              |               |            |              |              |               |
| DR  | 0.00       | 0.00         | 0.00         | 0.00          | 0.00       | 0.00         | 0.00         | 0.00          | 0.02       | 0.03         | 0.03         | 0.03          |            |              |              |               |            |              |              |               |
| DP  | 0.00       | 0.00         | 0.00         | 0.00          | 0.00       | 0.00         | 0.00         | 0.00          | 0.03       | 0.04         | 0.04         | 0.04          |            |              |              |               |            |              |              |               |
| BA  | 0.66       | 0.68         | 0.54         | 0.50          | 0.83       | 0.84         | 0.85         | 0.75          | 0.96       | 0.96         | 0.96         | 0.95          |            |              |              |               |            |              |              |               |

Caption: Sen – Sensitivity; Spe – Specificity; PPV – Positive Predictive Value; NPV – Negative Predictive Value; F1 – F1-score; Pre – Prevalence; DR – Detection Rate; DP – Detection Prevalence; BA – Balanced Accuracy; C00-C97 - Malignant neoplasms; D00-D09 - In situ neoplasms; D10-D36 - Benign neoplasms; D37-D48 - Neoplasms of uncertain or unknown behaviour; I05-I09 - Chronic rheumatic heart diseases; I10-I15 - Hypertensive diseases; I20-I25 - Ischaemic heart diseases; I26-I28 - Pulmonary heart disease and diseases of pulmonary circulation; I30-I52 - Other forms of heart disease; I60-I69 - Cerebrovascular diseases; I70-I79 - Diseases of arteries, arterioles and capillaries; I80-I89 - Diseases of veins, lymphatic vessels and lymph nodes, not elsewhere classified; I95-I99 - Other and unspecified disorders of the circulatory system; J00-J06 - Acute upper respiratory infections; J09-J18 - Influenza and pneumonia; J20-J22 - Other acute lower respiratory infections; J30-J39 - Other diseases of upper respiratory tract; J40-J47 - Chronic lower respiratory diseases; J60-J70 - Lung diseases due to external agents; J80-J84 - Other respiratory diseases principally

affecting the interstitium; J85-J86 - Suppurative and necrotic conditions of lower respiratory tract; J90-J94 - Other diseases of pleura; J95-J99 - Other diseases of the respiratory system

*Supplementary Table 34 - Weighted-averages for performance metrics for different periods, for ICD-10's block classification of AUTOCOD*

| Block                   | Period          | Sensitivity | Specificity | Pos Pred Value | Neg Pred Value | F1   | Prevalence | Detection Rate | Detection Prevalence | Balanced Accuracy |
|-------------------------|-----------------|-------------|-------------|----------------|----------------|------|------------|----------------|----------------------|-------------------|
| <b>Weighted-average</b> | No Excess Mort. | 0.94        | 0.99        | 0.93           | 0.99           | 0.93 | 0.20       | 0.20           | 0.20                 | 0.96              |
|                         | Excess Mort.    | 0.94        | 0.99        | 0.94           | 0.99           | 0.94 | 0.21       | 0.21           | 0.21                 | 0.97              |
|                         | Severe +4SD     | 0.93        | 0.99        | 0.93           | 0.99           | 0.93 | 0.17       | 0.17           | 0.17                 | 0.96              |
|                         | Extreme +6SD    | 0.93        | 0.99        | 0.93           | 0.99           | 0.93 | 0.16       | 0.15           | 0.16                 | 0.96              |

## All periods

Supplementary Table 35 - Distribution of death certificates in the dataset, according to year of death and to ICD-10 block (descendent order, 50 most common blocks), for all periods

| Chapter | Block   | Block Description                                                              | N      | %     |
|---------|---------|--------------------------------------------------------------------------------|--------|-------|
| II      | C00-C97 | Malignant neoplasms                                                            | 84 031 | 25.46 |
| IX      | I60-I69 | Cerebrovascular diseases                                                       | 34 595 | 10.48 |
| IX      | I30-I52 | Other forms of heart disease                                                   | 26 016 | 7.88  |
| IX      | I20-I25 | Ischaemic heart diseases                                                       | 21 153 | 6.41  |
| X       | J09-J18 | Influenza and pneumonia                                                        | 18 191 | 5.51  |
| IV      | E10-E14 | Diabetes mellitus                                                              | 12 731 | 3.86  |
| V       | F00-F09 | Organic, including symptomatic, mental disorders                               | 12 150 | 3.68  |
| X       | J40-J47 | Chronic lower respiratory diseases                                             | 8 953  | 2.71  |
| XX      | V01-X59 | Accidents                                                                      | 8 509  | 2.58  |
| IX      | I10-I15 | Hypertensive diseases                                                          | 7 611  | 2.31  |
| X       | J95-J99 | Other diseases of the respiratory system                                       | 6 445  | 1.95  |
| XVIII   | R50-R69 | General symptoms and signs                                                     | 6 022  | 1.82  |
| XVIII   | R00-R09 | Symptoms and signs involving the circulatory and respiratory systems           | 5 799  | 1.76  |
| VI      | G30-G32 | Other degenerative diseases of the nervous system                              | 5 428  | 1.64  |
| IX      | I70-I79 | Diseases of arteries, arterioles and capillaries                               | 4 794  | 1.45  |
| XI      | K70-K77 | Diseases of liver                                                              | 4 574  | 1.39  |
| XIV     | N30-N39 | Other diseases of the urinary system                                           | 4 461  | 1.35  |
| XVIII   | R95-R99 | Ill-defined and unknown cause of mortality                                     | 4 385  | 1.33  |
| XI      | K55-K64 | Other diseases of intestines                                                   | 4 218  | 1.28  |
| XIV     | N17-N19 | Acute kidney failure and chronic kidney disease                                | 3 998  | 1.21  |
| I       | A30-A49 | Other bacterial diseases                                                       | 3 066  | 0.93  |
| VI      | G20-G26 | Extrapyramidal and movement disorders                                          | 2 862  | 0.87  |
| XX      | X60-X84 | Intentional self-harm                                                          | 2 808  | 0.85  |
| XI      | K80-K87 | Disorders of gallbladder, biliary tract and pancreas                           | 2 345  | 0.71  |
| X       | J60-J70 | Lung diseases due to external agents                                           | 2 340  | 0.71  |
| IX      | I26-I28 | Pulmonary heart disease and diseases of pulmonary circulation                  | 2 314  | 0.70  |
| IV      | E70-E90 | Metabolic disorders                                                            | 2 302  | 0.70  |
| X       | J20-J22 | Other acute lower respiratory infections                                       | 2 102  | 0.64  |
| XX      | Y10-Y34 | Event of undetermined intent                                                   | 1 819  | 0.55  |
| X       | J80-J84 | Other respiratory diseases principally affecting the interstitium              | 1 636  | 0.50  |
| II      | D37-D48 | Neoplasms of uncertain or unknown behaviour                                    | 1 486  | 0.45  |
| VI      | G40-G47 | Episodic and paroxysmal disorders                                              | 1 105  | 0.33  |
| XI      | K90-K93 | Other diseases of the digestive system                                         | 1 049  | 0.32  |
| XIV     | N10-N16 | Renal tubulo-interstitial diseases                                             | 1 032  | 0.31  |
| I       | B20-B24 | Human immunodeficiency virus [HIV] disease                                     | 961    | 0.29  |
| VI      | G10-G14 | Systemic atrophies primarily affecting the central nervous system              | 942    | 0.29  |
| XI      | K20-K31 | Diseases of oesophagus, stomach and duodenum                                   | 921    | 0.28  |
| IV      | E65-E68 | Obesity and other hyperalimentation                                            | 758    | 0.23  |
| I       | A00-A09 | Intestinal infectious diseases                                                 | 682    | 0.21  |
| NA      | D60-D64 | Aplastic and other anaemias                                                    | 644    | 0.20  |
| XI      | K50-K52 | Noninfective enteritis and colitis                                             | 634    | 0.19  |
| XI      | K65-K67 | Diseases of peritoneum                                                         | 605    | 0.18  |
| IX      | I05-I09 | Chronic rheumatic heart diseases                                               | 490    | 0.15  |
| XI      | K40-K46 | Hernia                                                                         | 477    | 0.14  |
| XX      | Y40-Y84 | Complications of medical and surgical care                                     | 475    | 0.14  |
| XIII    | M00-M25 | Arthropathies                                                                  | 434    | 0.13  |
| IX      | I80-I89 | Diseases of veins, lymphatic vessels and lymph nodes, not elsewhere classified | 427    | 0.13  |
| VI      | G90-G99 | Other disorders of the nervous system                                          | 398    | 0.12  |
| XIII    | M30-M36 | Systemic connective tissue disorders                                           | 359    | 0.11  |
| I       | A15-A19 | Tuberculosis                                                                   | 345    | 0.10  |

Supplementary Table 36 - Distribution of death certificates in the dataset, according to ICD-10 block (descendent order, for the three most common chapters – II, IX and X), for all periods

| Chapter   | Block       | Block Description                                                              | N      | %     |
|-----------|-------------|--------------------------------------------------------------------------------|--------|-------|
| <b>II</b> | C00-<br>C97 | Malignant neoplasms                                                            | 84 031 | 37.60 |
| <b>IX</b> | I60-I69     | Cerebrovascular diseases                                                       | 34 595 | 15.48 |
| <b>IX</b> | I30-I52     | Other forms of heart disease                                                   | 26 016 | 11.64 |
| <b>IX</b> | I20-I25     | Ischaemic heart diseases                                                       | 21 153 | 9.47  |
| <b>X</b>  | J09-J18     | Influenza and pneumonia                                                        | 18 191 | 8.14  |
| <b>X</b>  | J40-J47     | Chronic lower respiratory diseases                                             | 8 953  | 4.01  |
| <b>IX</b> | I10-I15     | Hypertensive diseases                                                          | 7 611  | 3.41  |
| <b>X</b>  | J95-J99     | Other diseases of the respiratory system                                       | 6 445  | 2.88  |
| <b>IX</b> | I70-I79     | Diseases of arteries, arterioles and capillaries                               | 4 794  | 2.15  |
| <b>X</b>  | J60-J70     | Lung diseases due to external agents                                           | 2 340  | 1.05  |
| <b>IX</b> | I26-I28     | Pulmonary heart disease and diseases of pulmonary circulation                  | 2 314  | 1.04  |
| <b>X</b>  | J20-J22     | Other acute lower respiratory infections                                       | 2 102  | 0.94  |
| <b>X</b>  | J80-J84     | Other respiratory diseases principally affecting the interstitium              | 1 636  | 0.73  |
| <b>II</b> | D37-<br>D48 | Neoplasms of uncertain or unknown behaviour                                    | 1 486  | 0.66  |
| <b>IX</b> | I05-I09     | Chronic rheumatic heart diseases                                               | 490    | 0.22  |
| <b>IX</b> | I80-I89     | Diseases of veins, lymphatic vessels and lymph nodes, not elsewhere classified | 427    | 0.19  |
| <b>II</b> | D10-<br>D36 | Benign neoplasms                                                               | 311    | 0.14  |
| <b>X</b>  | J90-J94     | Other diseases of pleura                                                       | 221    | 0.10  |
| <b>X</b>  | J85-J86     | Suppurative and necrotic conditions of lower respiratory tract                 | 215    | 0.10  |
| <b>X</b>  | J30-J39     | Other diseases of upper respiratory tract                                      | 53     | 0.02  |
| <b>X</b>  | J00-J06     | Acute upper respiratory infections                                             | 46     | 0.02  |
| <b>IX</b> | I95-I99     | Other and unspecified disorders of the circulatory system                      | 20     | 0.01  |
| <b>II</b> | D00-<br>D09 | In situ neoplasms                                                              | 9      | 0.00  |

Supplementary Table 37 - Distribution of death certificates in the dataset, according to ICD-10 block (descendent order, for the three most common chapters – II, IX and X), for all periods

| Year of Death | Chapter | Block   | Block Description                                                 | N      | %     |
|---------------|---------|---------|-------------------------------------------------------------------|--------|-------|
| 2018          | II      | C00-C97 | Malignant neoplasms                                               | 27 710 | 12.40 |
| 2016          | II      | C00-C97 | Malignant neoplasms                                               | 27 374 | 12.25 |
| 2017          | II      | C00-C97 | Malignant neoplasms                                               | 27 286 | 12.21 |
| 2016          | IX      | I60-I69 | Cerebrovascular diseases                                          | 11 722 | 5.25  |
| 2017          | IX      | I60-I69 | Cerebrovascular diseases                                          | 11 096 | 4.97  |
| 2018          | IX      | I60-I69 | Cerebrovascular diseases                                          | 11 019 | 4.93  |
| 2018          | IX      | I30-I52 | Other forms of heart disease                                      | 8 564  | 3.83  |
| 2016          | IX      | I30-I52 | Other forms of heart disease                                      | 8 509  | 3.81  |
| 2017          | IX      | I30-I52 | Other forms of heart disease                                      | 8 276  | 3.70  |
| 2016          | IX      | I20-I25 | Ischaemic heart diseases                                          | 7 359  | 3.29  |
| 2017          | IX      | I20-I25 | Ischaemic heart diseases                                          | 6 772  | 3.03  |
| 2018          | IX      | I20-I25 | Ischaemic heart diseases                                          | 6 513  | 2.91  |
| 2016          | X       | J09-J18 | Influenza and pneumonia                                           | 6 129  | 2.74  |
| 2018          | X       | J09-J18 | Influenza and pneumonia                                           | 5 915  | 2.65  |
| 2017          | X       | J09-J18 | Influenza and pneumonia                                           | 5 686  | 2.54  |
| 2016          | X       | J40-J47 | Chronic lower respiratory diseases                                | 3 006  | 1.35  |
| 2018          | X       | J40-J47 | Chronic lower respiratory diseases                                | 2 977  | 1.33  |
| 2017          | X       | J40-J47 | Chronic lower respiratory diseases                                | 2 762  | 1.24  |
| 2018          | IX      | I10-I15 | Hypertensive diseases                                             | 2 631  | 1.18  |
| 2016          | IX      | I10-I15 | Hypertensive diseases                                             | 2 430  | 1.09  |
| 2017          | IX      | I10-I15 | Hypertensive diseases                                             | 2 348  | 1.05  |
| 2018          | X       | J95-J99 | Other diseases of the respiratory system                          | 2 148  | 0.96  |
| 2017          | X       | J95-J99 | Other diseases of the respiratory system                          | 2 097  | 0.94  |
| 2016          | X       | J95-J99 | Other diseases of the respiratory system                          | 2 037  | 0.91  |
| 2019          | II      | C00-C97 | Malignant neoplasms                                               | 1 661  | 0.74  |
| 2016          | IX      | I70-I79 | Diseases of arteries, arterioles and capillaries                  | 1 610  | 0.72  |
| 2018          | IX      | I70-I79 | Diseases of arteries, arterioles and capillaries                  | 1 558  | 0.70  |
| 2017          | IX      | I70-I79 | Diseases of arteries, arterioles and capillaries                  | 1 543  | 0.69  |
| 2018          | X       | J60-J70 | Lung diseases due to external agents                              | 830    | 0.37  |
| 2016          | X       | I26-I28 | Pulmonary heart disease and diseases of pulmonary circulation     | 829    | 0.37  |
| 2016          | X       | J20-J22 | Other acute lower respiratory infections                          | 786    | 0.35  |
| 2017          | X       | I26-I28 | Pulmonary heart disease and diseases of pulmonary circulation     | 783    | 0.35  |
| 2019          | IX      | I60-I69 | Cerebrovascular diseases                                          | 758    | 0.34  |
| 2016          | X       | J60-J70 | Lung diseases due to external agents                              | 733    | 0.33  |
| 2017          | X       | J60-J70 | Lung diseases due to external agents                              | 728    | 0.33  |
| 2017          | X       | J20-J22 | Other acute lower respiratory infections                          | 705    | 0.32  |
| 2019          | IX      | I30-I52 | Other forms of heart disease                                      | 667    | 0.30  |
| 2018          | X       | I26-I28 | Pulmonary heart disease and diseases of pulmonary circulation     | 661    | 0.30  |
| 2016          | X       | J80-J84 | Other respiratory diseases principally affecting the interstitium | 590    | 0.26  |
| 2018          | X       | J20-J22 | Other acute lower respiratory infections                          | 587    | 0.26  |
| 2016          | II      | D37-D48 | Neoplasms of uncertain or unknown behaviour                       | 510    | 0.23  |
| 2019          | IX      | I20-I25 | Ischaemic heart diseases                                          | 509    | 0.23  |
| 2018          | X       | J80-J84 | Other respiratory diseases principally affecting the interstitium | 504    | 0.23  |

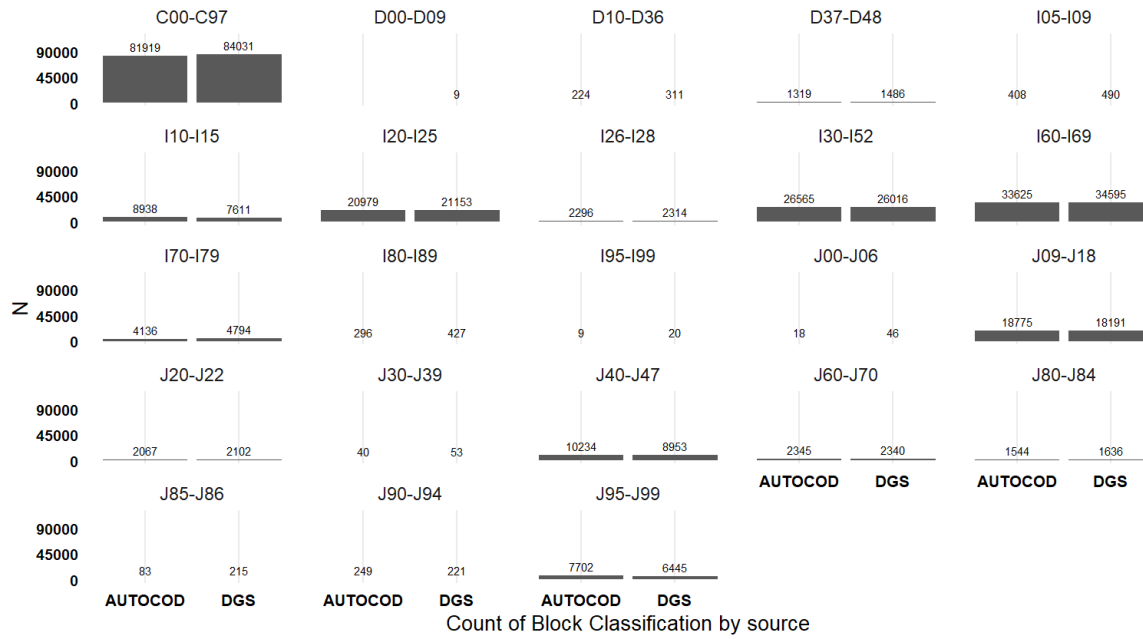

Supplementary Figure 20 - Count of death certificates classified by ICD-10 block either by human coders (DGS) or by AUTOCOD, in all periods

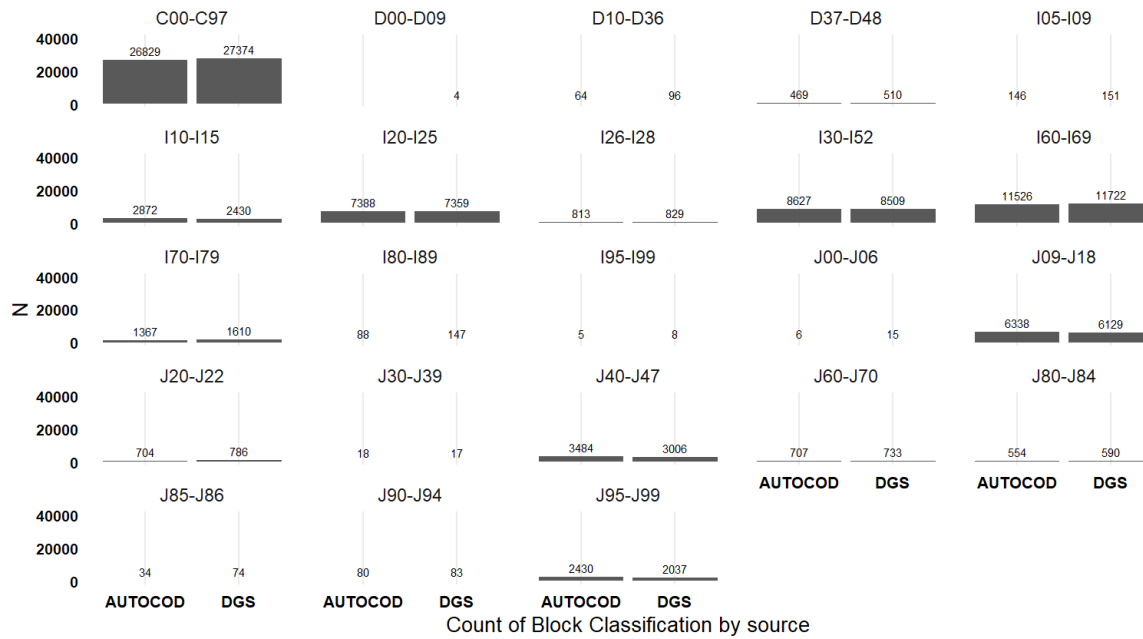

Supplementary Figure 21 - Count of death certificates classified by ICD-10 block either by human coders (DGS) or by AUTOCOD, in 2016

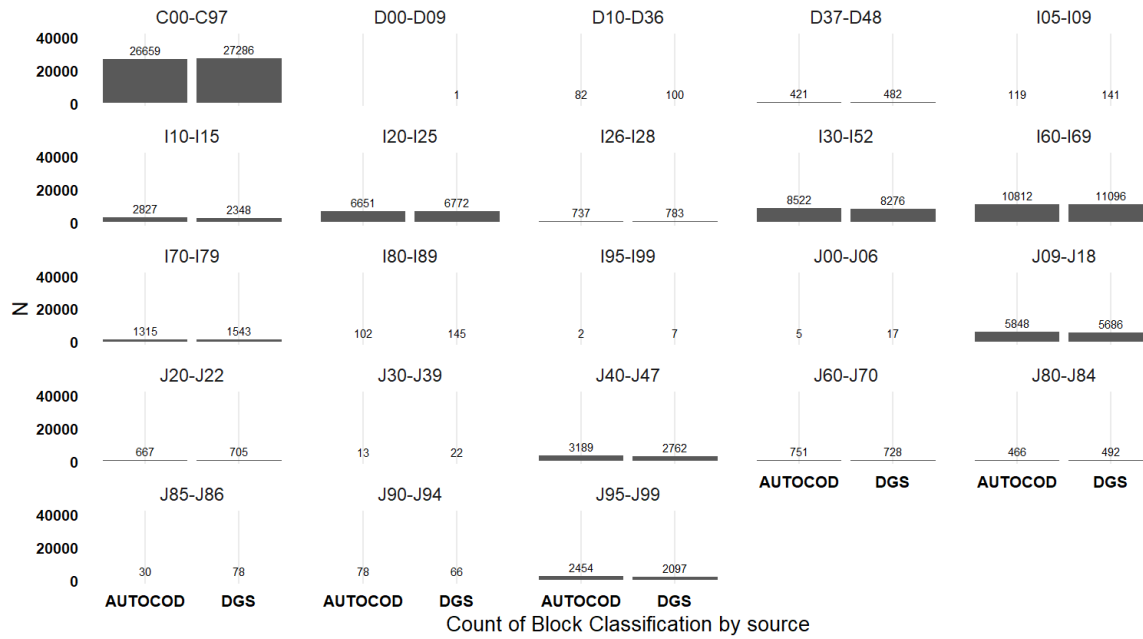

Supplementary Figure 22 - Count of death certificates classified by ICD-10 block either by human coders (DGS) or by AUTOCOD, in 2017

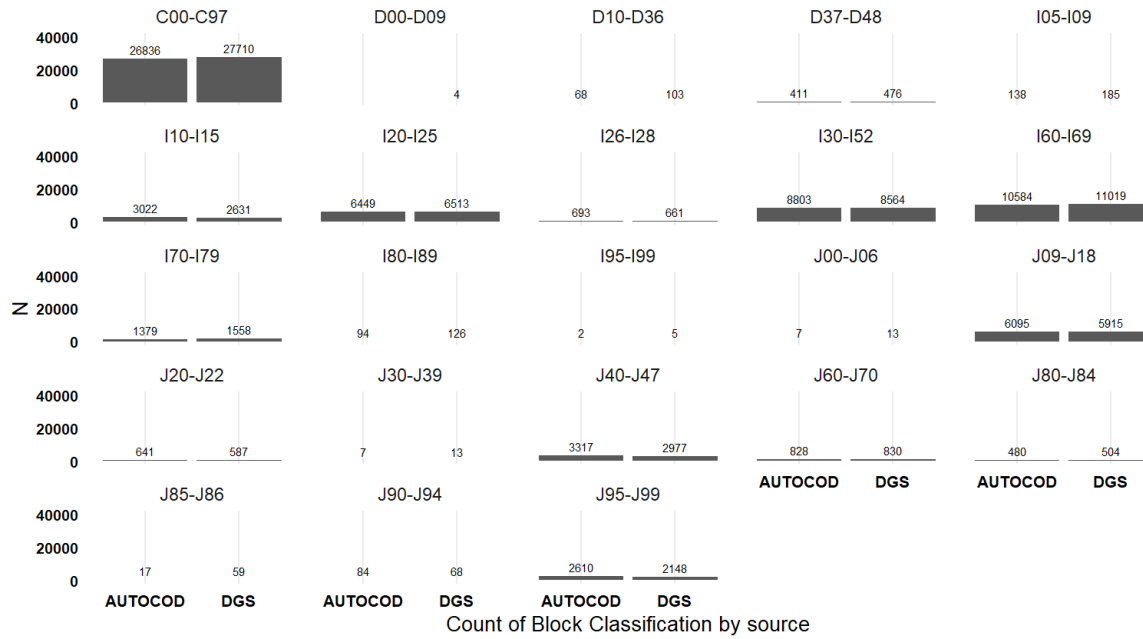

Supplementary Figure 23 - Count of death certificates classified by ICD-10 block either by human coders (DGS) or by AUTOCOD, in 2018

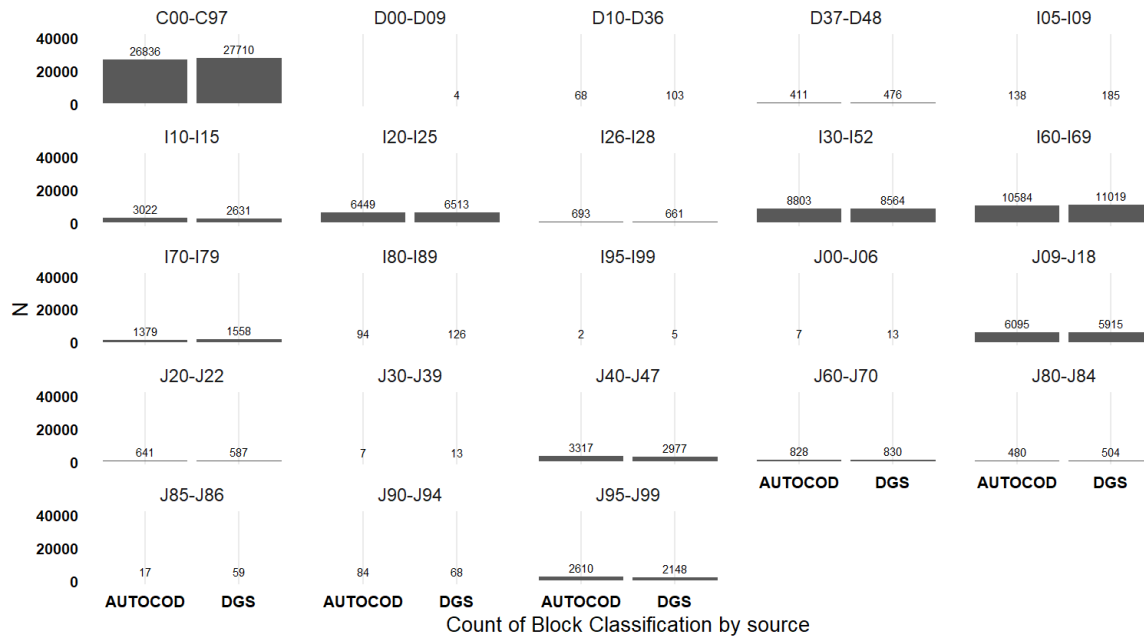

Supplementary Figure 24 - Count of death certificates classified by ICD-10 block either by human coders (DGS) or by AUTOCOD, in 2019

Supplementary Table 38 - Confusion matrix for ICD-10 block classification, all periods

|         | C00-C97   | D00-D09 | D10-D36 | D37-D48 | I05-I09 | I10-I15  | I20-I25   | I26-I28  | I30-I52   | I60-I69   | I70-I79  | I80-I89 | I95-I99 | J00-J06 | J09-J18   | J20-J22  | J30-J39 | J40-J47  | J60-J70  | J80-J84  | J85-J86 | J90-J94 | J95-J99  |
|---------|-----------|---------|---------|---------|---------|----------|-----------|----------|-----------|-----------|----------|---------|---------|---------|-----------|----------|---------|----------|----------|----------|---------|---------|----------|
| C00-C97 | 79<br>941 | 3       | 29      | 181     | 3       | 44       | 67        | 15       | 110       | 112       | 23       | 17      | 0       | 1       | 63        | 15       | 1       | 42       | 17       | 12       | 1       | 4       | 17       |
| D00-D09 | 0         | 0       | 0       | 0       | 0       | 0        | 0         | 0        | 0         | 0         | 0        | 0       | 0       | 0       | 0         | 0        | 0       | 0        | 0        | 0        | 0       | 0       | 0        |
| D10-D36 | 23        | 0       | 162     | 3       | 0       | 0        | 0         | 0        | 1         | 8         | 0        | 0       | 0       | 0       | 9         | 0        | 0       | 1        | 0        | 1        | 0       | 0       | 1        |
| D37-D48 | 151       | 0       | 0       | 983     | 2       | 3        | 2         | 0        | 5         | 11        | 1        | 0       | 0       | 0       | 11        | 0        | 1       | 9        | 0        | 4        | 0       | 1       | 8        |
| I05-I09 | 5         | 0       | 0       | 0       | 191     | 9        | 15        | 0        | 135       | 8         | 2        | 1       | 0       | 0       | 2         | 0        | 0       | 2        | 1        | 0        | 0       | 0       | 1        |
| I10-I15 | 104       | 0       | 5       | 8       | 12      | 5<br>830 | 368       | 83       | 301       | 470       | 227      | 13      | 0       | 0       | 55        | 1        | 0       | 89       | 29       | 24       | 0       | 4       | 54       |
| I20-I25 | 105       | 1       | 4       | 10      | 18      | 94       | 18<br>661 | 72       | 504       | 203       | 82       | 18      | 2       | 0       | 43        | 9        | 1       | 75       | 3        | 9        | 2       | 4       | 31       |
| I26-I28 | 50        | 0       | 1       | 5       | 8       | 29       | 36        | 1<br>718 | 148       | 14        | 21       | 16      | 0       | 0       | 8         | 0        | 0       | 28       | 2        | 14       | 0       | 5       | 11       |
| I30-I52 | 201       | 0       | 0       | 14      | 198     | 461      | 532       | 121      | 22<br>399 | 313       | 250      | 21      | 3       | 0       | 78        | 19       | 0       | 181      | 13       | 30       | 11      | 19      | 85       |
| I60-I69 | 191       | 0       | 17      | 30      | 8       | 127      | 177       | 23       | 413       | 30<br>518 | 94       | 14      | 2       | 2       | 193       | 131      | 5       | 106      | 43       | 15       | 8       | 5       | 83       |
| I70-I79 | 70        | 0       | 0       | 2       | 1       | 76       | 54        | 16       | 59        | 77        | 3<br>363 | 28      | 6       | 0       | 10        | 2        | 0       | 2        | 1        | 0        | 2       | 0       | 8        |
| I80-I89 | 14        | 0       | 1       | 0       | 0       | 2        | 3         | 9        | 8         | 10        | 5        | 177     | 1       | 0       | 2         | 0        | 0       | 0        | 0        | 0        | 1       | 2       | 1        |
| I95-I99 | 0         | 0       | 0       | 0       | 0       | 0        | 0         | 1        | 0         | 1         | 2        | 0       | 1       | 0       | 0         | 0        | 0       | 0        | 0        | 0        | 0       | 0       | 0        |
| J00-J06 | 1         | 0       | 0       | 0       | 0       | 0        | 0         | 0        | 0         | 1         | 0        | 0       | 0       | 8       | 0         | 0        | 0       | 0        | 0        | 0        | 0       | 0       | 3        |
| J09-J18 | 289       | 0       | 6       | 30      | 3       | 38       | 101       | 32       | 108       | 215       | 25       | 1       | 1       | 2       | 16<br>062 | 11       | 1       | 134      | 40       | 30       | 43      | 9       | 49       |
| J20-J22 | 32        | 0       | 0       | 1       | 1       | 3        | 3         | 0        | 12        | 52        | 5        | 0       | 0       | 1       | 12        | 1<br>660 | 0       | 103      | 2        | 1        | 1       | 0       | 21       |
| J30-J39 | 0         | 0       | 0       | 1       | 1       | 0        | 0         | 0        | 1         | 5         | 0        | 0       | 0       | 0       | 0         | 0        | 10      | 3        | 0        | 0        | 0       | 0       | 0        |
| J40-J47 | 233       | 0       | 1       | 52      | 0       | 58       | 80        | 36       | 177       | 186       | 7        | 4       | 0       | 3       | 372       | 99       | 3       | 7<br>633 | 64       | 71       | 42      | 5       | 94       |
| J60-J70 | 27        | 1       | 0       | 3       | 0       | 7        | 2         | 1        | 10        | 53        | 3        | 0       | 0       | 0       | 36        | 0        | 2       | 8        | 1<br>842 | 5        | 0       | 1       | 6        |
| J80-J84 | 26        | 0       | 1       | 1       | 0       | 8        | 16        | 10       | 33        | 1         | 0        | 2       | 0       | 0       | 24        | 4        | 1       | 14       | 25       | 1<br>245 | 1       | 0       | 9        |
| J85-J86 | 5         | 0       | 0       | 0       | 0       | 0        | 0         | 2        | 2         | 0         | 0        | 0       | 0       | 0       | 1         | 0        | 0       | 0        | 0        | 1        | 60      | 0       | 0        |
| J90-J94 | 21        | 0       | 0       | 3       | 0       | 1        | 1         | 0        | 25        | 3         | 0        | 1       | 0       | 0       | 12        | 5        | 0       | 0        | 4        | 1        | 0       | 126     | 0        |
| J95-J99 | 164       | 0       | 5       | 5       | 0       | 39       | 56        | 21       | 139       | 134       | 14       | 10      | 1       | 14      | 119       | 42       | 1       | 128      | 55       | 54       | 13      | 3       | 5<br>508 |



Caption: C00-C97 - Malignant neoplasms; D00-D09 - In situ neoplasms; D10-D36 - Benign neoplasms; D37-D48 - Neoplasms of uncertain or unknown behaviour; I05-I09 - Chronic rheumatic heart diseases; I10-I15 - Hypertensive diseases; I20-I25 - Ischaemic heart diseases; I26-I28 - Pulmonary heart disease and diseases of pulmonary circulation; I30-I52 - Other forms of heart disease; I60-I69 - Cerebrovascular diseases; I70-I79 - Diseases of arteries, arterioles and capillaries; I80-I89 - Diseases of veins, lymphatic vessels and lymph nodes, not elsewhere classified; I95-I99 - Other and unspecified disorders of the circulatory system; J00-J06 - Acute upper respiratory infections; J09-J18 - Influenza and pneumonia; J20-J22 - Other acute lower respiratory infections; J30-J39 - Other diseases of upper respiratory tract; J40-J47 - Chronic lower respiratory diseases; J60-J70 - Lung diseases due to external agents; J80-J84 - Other respiratory diseases principally affecting the interstitium; J85-J86 - Suppurative and necrotic conditions of lower respiratory tract; J90-J94 - Other diseases of pleura; J95-J99 - Other diseases of the respiratory system

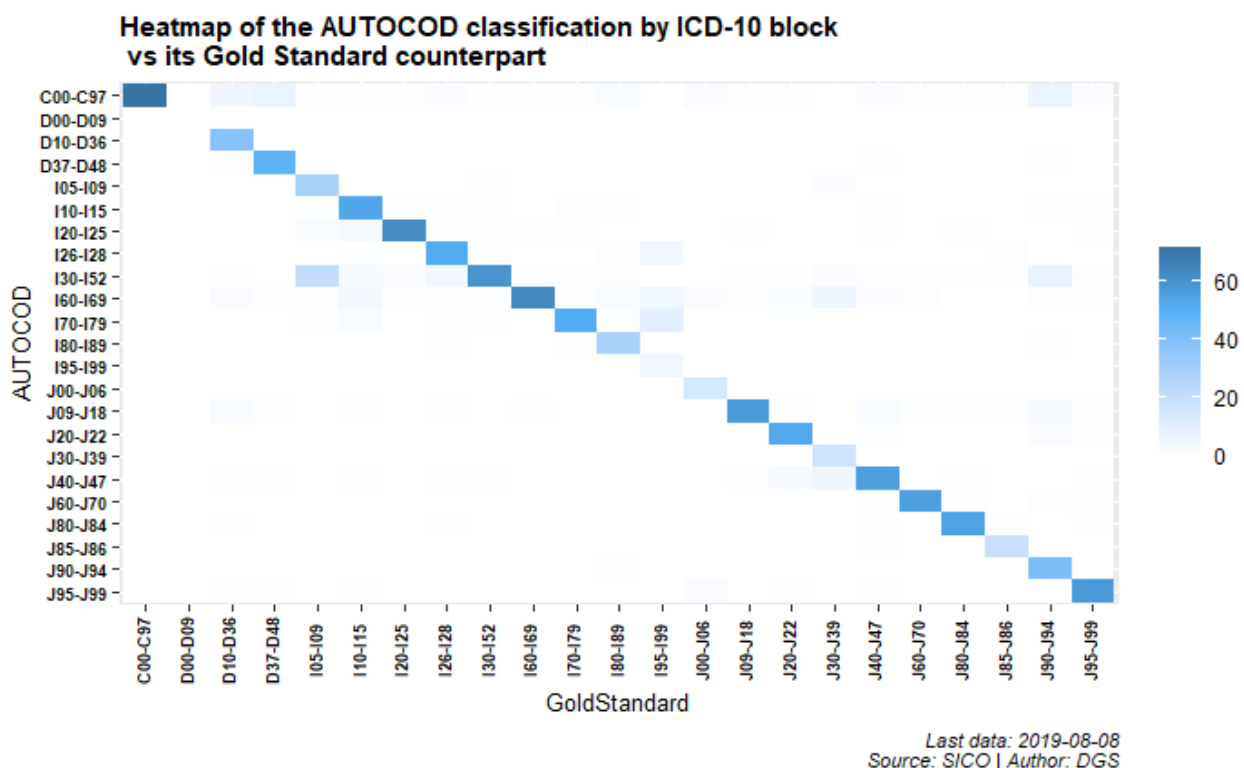

Supplementary Figure 25 - Heatmap of the AUTOCOD classification by ICD-10 block vs its Gold Standard counterpart. Values on the diagonal represent correct classifications, during all period

Caption: C00-C97 - Malignant neoplasms; D00-D09 - In situ neoplasms; D10-D36 - Benign neoplasms; D37-D48 - Neoplasms of uncertain or unknown behaviour; I05-I09 - Chronic rheumatic heart diseases; I10-I15 - Hypertensive diseases; I20-I25 - Ischaemic heart diseases; I26-I28 - Pulmonary heart disease and diseases of pulmonary circulation; I30-I52 - Other forms of heart disease; I60-I69 - Cerebrovascular diseases; I70-I79 - Diseases of arteries, arterioles and capillaries; I80-I89 - Diseases of veins, lymphatic vessels and lymph nodes, not elsewhere classified; I95-I99 - Other and unspecified disorders of the circulatory system; J00-J06 - Acute upper respiratory infections; J09-J18 - Influenza and pneumonia; J20-J22 - Other acute lower respiratory infections; J30-J39 - Other diseases of upper respiratory tract; J40-J47 - Chronic lower respiratory diseases; J60-J70 - Lung diseases due to external agents; J80-J84 - Other respiratory diseases principally affecting the interstitium; J85-J86 - Suppurative and necrotic conditions of lower respiratory tract; J90-J94 - Other diseases of pleura; J95-J99 - Other diseases of the respiratory system

Supplementary Table 39 - Overall performance metrics of AUTOCOD when classifying by ICD-10 block, all periods

|                       |      |
|-----------------------|------|
| <b>Accuracy</b>       | 0.93 |
| <b>Kappa</b>          | 0.92 |
| <b>AccuracyLower</b>  | 0.93 |
| <b>AccuracyUpper</b>  | 0.94 |
| <b>AccuracyNull</b>   | 0.39 |
| <b>AccuracyPValue</b> | 0.00 |

Supplementary Table 40 - Performance Metrics of AUTOCOD by ICD-10 block, all periods

| Block   | Sensitivity | Specificity | Pos Pred Value | Neg Pred Value | F1   | Prevalence | Detection Rate | Detection Prevalence | Balanced Accuracy |
|---------|-------------|-------------|----------------|----------------|------|------------|----------------|----------------------|-------------------|
| C00-C97 | 0.98        | 0.99        | 0.99           | 0.99           | 0.99 | 0.39       | 0.38           | 0.38                 | 0.99              |
| D00-D09 | 0.00        | 1.00        | NaN            | 1.00           | NA   | 0.00       | 0.00           | 0.00                 | 0.50              |
| D10-D36 | 0.70        | 1.00        | 0.78           | 1.00           | 0.74 | 0.00       | 0.00           | 0.00                 | 0.85              |
| D37-D48 | 0.74        | 1.00        | 0.83           | 1.00           | 0.78 | 0.01       | 0.01           | 0.01                 | 0.87              |
| I05-I09 | 0.43        | 1.00        | 0.51           | 1.00           | 0.47 | 0.00       | 0.00           | 0.00                 | 0.71              |
| I10-I15 | 0.85        | 0.99        | 0.76           | 1.00           | 0.80 | 0.03       | 0.03           | 0.04                 | 0.92              |
| I20-I25 | 0.93        | 0.99        | 0.94           | 0.99           | 0.93 | 0.10       | 0.09           | 0.09                 | 0.96              |
| I26-I28 | 0.80        | 1.00        | 0.81           | 1.00           | 0.80 | 0.01       | 0.01           | 0.01                 | 0.90              |
| I30-I52 | 0.91        | 0.99        | 0.90           | 0.99           | 0.90 | 0.12       | 0.11           | 0.12                 | 0.95              |
| I60-I69 | 0.94        | 0.99        | 0.95           | 0.99           | 0.95 | 0.15       | 0.14           | 0.15                 | 0.97              |
| I70-I79 | 0.82        | 1.00        | 0.89           | 1.00           | 0.85 | 0.02       | 0.02           | 0.02                 | 0.91              |
| I80-I89 | 0.55        | 1.00        | 0.75           | 1.00           | 0.63 | 0.00       | 0.00           | 0.00                 | 0.77              |
| I95-I99 | 0.06        | 1.00        | 0.20           | 1.00           | 0.09 | 0.00       | 0.00           | 0.00                 | 0.53              |
| J00-J06 | 0.26        | 1.00        | 0.62           | 1.00           | 0.36 | 0.00       | 0.00           | 0.00                 | 0.63              |
| J09-J18 | 0.94        | 0.99        | 0.93           | 1.00           | 0.94 | 0.08       | 0.08           | 0.08                 | 0.97              |
| J20-J22 | 0.83        | 1.00        | 0.87           | 1.00           | 0.85 | 0.01       | 0.01           | 0.01                 | 0.92              |
| J30-J39 | 0.39        | 1.00        | 0.48           | 1.00           | 0.43 | 0.00       | 0.00           | 0.00                 | 0.69              |
| J40-J47 | 0.89        | 0.99        | 0.83           | 1.00           | 0.86 | 0.04       | 0.04           | 0.04                 | 0.94              |
| J60-J70 | 0.86        | 1.00        | 0.92           | 1.00           | 0.89 | 0.01       | 0.01           | 0.01                 | 0.93              |
| J80-J84 | 0.82        | 1.00        | 0.88           | 1.00           | 0.85 | 0.01       | 0.01           | 0.01                 | 0.91              |
| J85-J86 | 0.32        | 1.00        | 0.85           | 1.00           | 0.47 | 0.00       | 0.00           | 0.00                 | 0.66              |
| J90-J94 | 0.67        | 1.00        | 0.62           | 1.00           | 0.65 | 0.00       | 0.00           | 0.00                 | 0.84              |
| J95-J99 | 0.92        | 1.00        | 0.84           | 1.00           | 0.88 | 0.03       | 0.03           | 0.03                 | 0.96              |

Caption: C00-C97 - Malignant neoplasms; D00-D09 - In situ neoplasms; D10-D36 - Benign neoplasms; D37-D48 - Neoplasms of uncertain or unknown behaviour; I05-I09 - Chronic rheumatic heart diseases; I10-I15 - Hypertensive diseases; I20-I25 - Ischaemic heart diseases; I26-I28 - Pulmonary heart disease and diseases of pulmonary circulation; I30-I52 - Other forms of heart disease; I60-I69 - Cerebrovascular diseases; I70-I79 - Diseases of arteries, arterioles and capillaries; I80-I89 - Diseases of veins, lymphatic vessels and lymph nodes, not elsewhere classified; I95-I99 - Other and unspecified disorders of the circulatory system; J00-J06 - Acute upper respiratory infections; J09-J18 - Influenza and pneumonia; J20-J22 - Other acute lower respiratory infections; J30-J39 - Other diseases of upper respiratory tract; J40-J47 - Chronic lower respiratory diseases; J60-J70 - Lung diseases due to external agents; J80-J84 - Other respiratory diseases principally affecting the interstitium; J85-J86 - Suppurative and necrotic conditions of lower respiratory tract; J90-J94 - Other diseases of pleura; J95-J99 - Other diseases of the respiratory system

### Periods of excess mortality

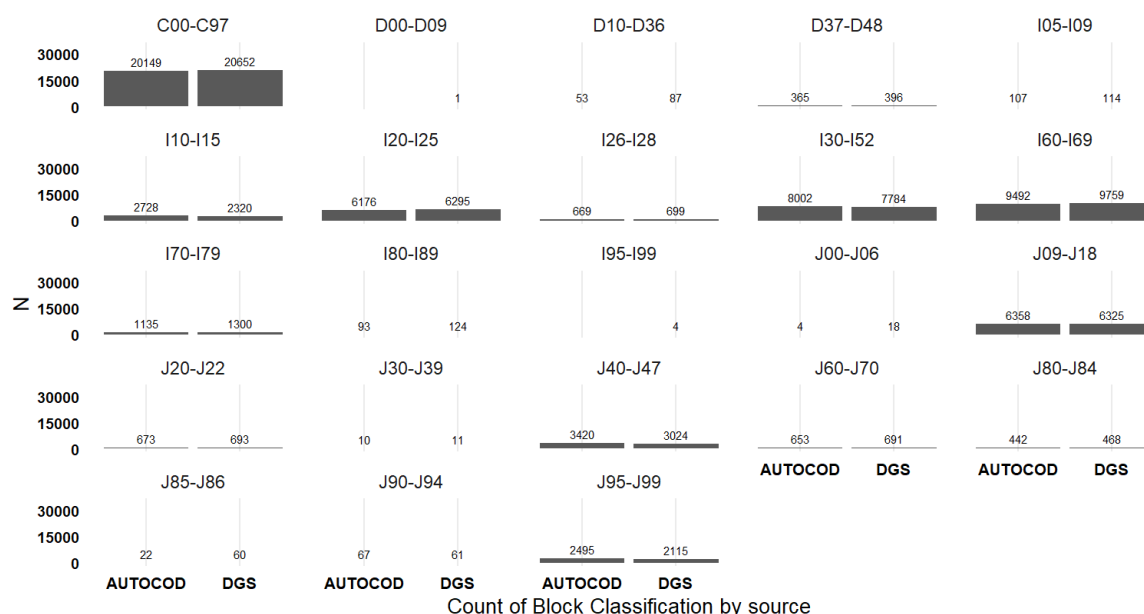

Supplementary Figure 26 - Count of death certificates classified by ICD-10 block either by human coders (DGS) or by AUTOCOD, in periods of excess mortality

Supplementary Table 41 - Confusion matrix for ICD-10 block classification, excess mortality periods

|         |             | Human Coders (GOLD-STANDARD) |             |             |             |             |             |             |             |             |             |             |             |             |             |             |             |             |             |             |             |             |             |             |   |
|---------|-------------|------------------------------|-------------|-------------|-------------|-------------|-------------|-------------|-------------|-------------|-------------|-------------|-------------|-------------|-------------|-------------|-------------|-------------|-------------|-------------|-------------|-------------|-------------|-------------|---|
|         |             | C00-<br>C97                  | D00-<br>D09 | D10-<br>D36 | D37-<br>D48 | I05-<br>I09 | I10-<br>I15 | I20-<br>I25 | I26-<br>I28 | I30-<br>I52 | I60-<br>I69 | I70-<br>I79 | I80-<br>I89 | I95-<br>I99 | J00-<br>J06 | J09-<br>J18 | J20-<br>J22 | J30-<br>J39 | J40-<br>J47 | J60-<br>J70 | J80-<br>J84 | J85-<br>J86 | J90-<br>J94 | J95-<br>J99 |   |
| AUTOCOD | C00-<br>C97 | #####                        | 0           | 9           | 53          | 0           | 12          | 27          | 5           | 35          | 41          | 9           | 6           | 0           | 0           | 26          | 5           | 1           | 13          | 6           | 1           | 0           | 1           | 4           |   |
|         | D00-<br>D09 | 0                            | 0           | 0           | 0           | 0           | 0           | 0           | 0           | 0           | 0           | 0           | 0           | 0           | 0           | 0           | 0           | 0           | 0           | 0           | 0           | 0           | 0           | 0           | 0 |
|         | D10-<br>D36 | 6                            | 0           | 42          | 0           | 0           | 0           | 0           | 0           | 0           | 1           | 0           | 0           | 0           | 0           | 1           | 0           | 0           | 0           | 0           | 0           | 0           | 0           | 0           | 0 |
|         | D37-<br>D48 | 47                           | 0           | 0           | 267         | 1           | 1           | 0           | 0           | 1           | 4           | 0           | 0           | 0           | 0           | 3           | 0           | 0           | 0           | 0           | 0           | 0           | 0           | 0           | 3 |
|         | I05-<br>I09 | 2                            | 0           | 0           | 0           | 52          | 4           | 2           | 0           | 32          | 1           | 0           | 0           | 0           | 0           | 2           | 0           | 0           | 2           | 1           | 0           | 0           | 0           | 0           | 1 |
|         | I10-<br>I15 | 34                           | 0           | 1           | 1           | 4           | 1,775       | 117         | 27          | 88          | 135         | 70          | 6           | 0           | 0           | 18          | 1           | 0           | 28          | 7           | 4           | 0           | 1           | 18          |   |
|         | I20-<br>I25 | 28                           | 0           | 0           | 3           | 4           | 28          | 5,493       | 22          | 144         | 68          | 23          | 5           | 1           | 0           | 18          | 3           | 1           | 31          | 1           | 1           | 2           | 0           | 6           |   |
|         | I26-<br>I28 | 12                           | 0           | 0           | 0           | 1           | 9           | 12          | 513         | 41          | 4           | 5           | 5           | 0           | 0           | 0           | 0           | 0           | 10          | 2           | 5           | 0           | 1           | 5           |   |
|         | I30-<br>I52 | 52                           | 0           | 0           | 4           | 41          | 132         | 161         | 39          | 6,761       | 104         | 56          | 10          | 0           | 0           | 26          | 8           | 0           | 73          | 5           | 10          | 3           | 7           | 32          |   |
|         | I60-<br>I69 | 47                           | 0           | 4           | 7           | 1           | 32          | 56          | 3           | 90          | 8,602       | 29          | 3           | 1           | 1           | 68          | 38          | 1           | 27          | 13          | 5           | 2           | 3           | 18          |   |
|         | I70-<br>I79 | 23                           | 0           | 0           | 0           | 1           | 24          | 14          | 6           | 17          | 22          | 908         | 8           | 2           | 0           | 2           | 1           | 0           | 0           | 1           | 0           | 0           | 0           | 0           | 2 |
|         | I80-<br>I89 | 3                            | 0           | 1           | 0           | 0           | 0           | 3           | 5           | 2           | 1           | 1           | 56          | 0           | 0           | 1           | 0           | 0           | 0           | 0           | 0           | 0           | 1           | 0           | 0 |
|         | I95-<br>I99 | 0                            | 0           | 0           | 0           | 0           | 0           | 0           | 0           | 0           | 0           | 0           | 0           | 0           | 0           | 0           | 0           | 0           | 0           | 0           | 0           | 0           | 0           | 0           | 0 |
|         | J00-<br>J06 | 0                            | 0           | 0           | 0           | 0           | 0           | 0           | 0           | 0           | 0           | 0           | 0           | 0           | 0           | 1           | 0           | 0           | 0           | 0           | 0           | 0           | 0           | 0           | 2 |
|         | J09-<br>J18 | 89                           | 0           | 2           | 10          | 1           | 11          | 34          | 12          | 37          | 64          | 5           | 0           | 0           | 1           | 5,506       | 5           | 0           | 43          | 14          | 7           | 11          | 2           | 13          |   |
|         | J20-<br>J22 | 14                           | 0           | 0           | 1           | 0           | 3           | 2           | 0           | 5           | 9           | 1           | 0           | 0           | 0           | 5           | 546         | 0           | 40          | 1           | 0           | 0           | 0           | 7           |   |
|         | J30-<br>J39 | 0                            | 0           | 0           | 1           | 0           | 0           | 0           | 0           | 0           | 2           | 0           | 0           | 0           | 0           | 0           | 0           | 0           | 1           | 0           | 0           | 0           | 0           | 0           |   |
|         | J40-<br>J47 | 66                           | 0           | 0           | 17          | 0           | 22          | 33          | 9           | 58          | 39          | 0           | 2           | 0           | 2           | 149         | 35          | 1           | 2,594       | 16          | 23          | 9           | 0           | 35          |   |
|         | J60-<br>J70 | 4                            | 0           | 0           | 0           | 0           | 1           | 2           | 0           | 1           | 17          | 0           | 0           | 0           | 0           | 11          | 0           | 0           | 1           | 530         | 2           | 0           | 0           | 2           |   |
|         | J80-<br>J84 | 5                            | 0           | 0           | 0           | 0           | 3           | 3           | 5           | 16          | 0           | 0           | 0           | 0           | 0           | 9           | 0           | 1           | 2           | 11          | 349         | 0           | 0           | 5           |   |
|         | J85-<br>J86 | 2                            | 0           | 0           | 0           | 0           | 0           | 0           | 0           | 0           | 0           | 0           | 0           | 0           | 0           | 0           | 0           | 0           | 0           | 0           | 0           | 17          | 0           | 0           |   |
|         | J90-<br>J94 | 6                            | 0           | 0           | 1           | 0           | 0           | 1           | 0           | 8           | 0           | 0           | 0           | 0           | 0           | 5           | 0           | 0           | 0           | 1           | 1           | 0           | 33          | 0           |   |
|         | J95-<br>J99 | 49                           | 0           | 2           | 2           | 0           | 15          | 25          | 5           | 44          | 41          | 7           | 3           | 0           | 9           | 47          | 15          | 0           | 37          | 21          | 22          | 3           | 0           | 1,790       |   |

Caption: C00-C97 - Malignant neoplasms; D00-D09 - In situ neoplasms; D10-D36 - Benign neoplasms; D37-D48 - Neoplasms of uncertain or unknown behaviour; I05-I09 - Chronic rheumatic heart diseases; I10-I15 - Hypertensive diseases; I20-I25 - Ischaemic heart diseases; I26-I28 - Pulmonary heart disease and diseases of pulmonary circulation; I30-I52 - Other forms of heart disease; I60-I69 - Cerebrovascular diseases; I70-I79 - Diseases of arteries, arterioles and capillaries; I80-I89 - Diseases of veins, lymphatic vessels and lymph nodes, not elsewhere classified; I95-I99 - Other and unspecified disorders of the circulatory system; J00-J06 - Acute upper respiratory infections; J09-J18 - Influenza and pneumonia; J20-J22 - Other acute lower respiratory infections; J30-J39 - Other diseases of upper respiratory tract; J40-J47 - Chronic lower respiratory diseases; J60-J70 - Lung diseases due to external agents; J80-J84 - Other respiratory diseases principally affecting the interstitium; J85-J86 - Suppurative and necrotic conditions of lower respiratory tract; J90-J94 - Other diseases of pleura; J95-J99 - Other diseases of the respiratory system

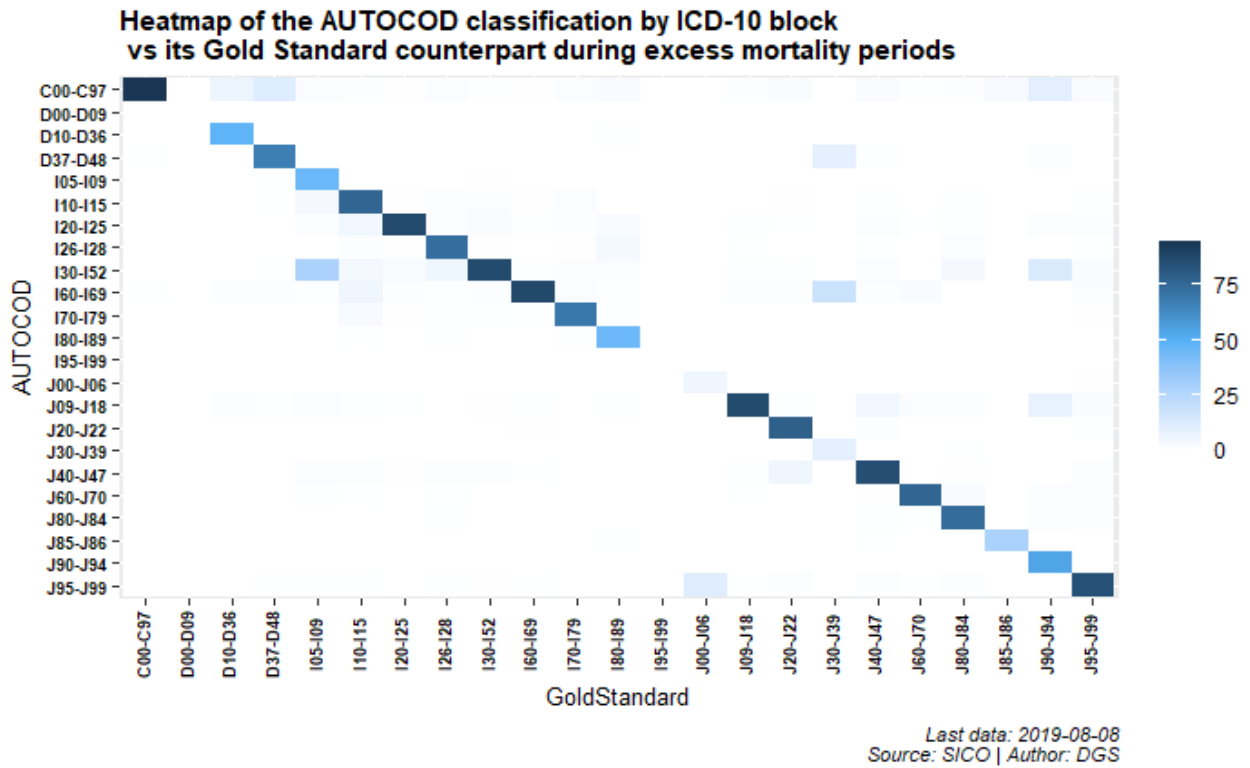

Supplementary Figure 27 - Heatmap of the AUTOCOD classification by ICD-10 block vs its Gold Standard counterpart. Values on the diagonal represent correct classifications, during excess mortality periods

Caption: C00-C97 - Malignant neoplasms; D00-D09 - In situ neoplasms; D10-D36 - Benign neoplasms; D37-D48 - Neoplasms of uncertain or unknown behaviour; I05-I09 - Chronic rheumatic heart diseases; I10-I15 - Hypertensive diseases; I20-I25 - Ischaemic heart diseases; I26-I28 - Pulmonary heart disease and diseases of pulmonary circulation; I30-I52 - Other forms of heart disease; I60-I69 - Cerebrovascular diseases; I70-I79 - Diseases of arteries, arterioles and capillaries; I80-I89 - Diseases of veins, lymphatic vessels and lymph nodes, not elsewhere classified; I95-I99 - Other and unspecified disorders of the circulatory system; J00-J06 - Acute upper respiratory infections; J09-J18 - Influenza and pneumonia; J20-J22 - Other acute lower respiratory infections; J30-J39 - Other diseases of upper respiratory tract; J40-J47 - Chronic lower respiratory diseases; J60-J70 - Lung diseases due to external agents; J80-J84 - Other respiratory diseases principally affecting the interstitium; J85-J86 - Suppurative and necrotic conditions of lower respiratory tract; J90-J94 - Other diseases of pleura; J95-J99 - Other diseases of the respiratory system

Supplementary Table 42 - Overall performance metrics of AUTOCOD when classifying by ICD-10 block, excess mortality periods

|                       |      |
|-----------------------|------|
| <b>Accuracy</b>       | 0.93 |
| <b>Kappa</b>          | 0.91 |
| <b>AccuracyLower</b>  | 0.93 |
| <b>AccuracyUpper</b>  | 0.93 |
| <b>AccuracyNull</b>   | 0.34 |
| <b>AccuracyPValue</b> | 0.00 |

Supplementary Table 43 - Performance Metrics of AUTOCOD by ICD-10 block, excess mortality periods

|                             | C00-<br>C97 | D00-<br>D09 | D10-<br>D36 | D37-<br>D48 | I05-<br>I09 | I10-<br>I15 | I20-<br>I25 | I26-<br>I28 | I30-<br>I52 | I60-<br>I69 | I70-<br>I79 | I80-<br>I89 | I95-<br>I99 | J00-<br>J06 | J09-<br>J18 | J20-<br>J22 | J30-<br>J39 | J40-<br>J47 | J60-<br>J70 | J80-<br>J84 | J85-<br>J86 | J90-<br>J94 | J95-<br>J99 |
|-----------------------------|-------------|-------------|-------------|-------------|-------------|-------------|-------------|-------------|-------------|-------------|-------------|-------------|-------------|-------------|-------------|-------------|-------------|-------------|-------------|-------------|-------------|-------------|-------------|
| <b>Sensitivity</b>          | 0.98        | NA          | 0.69        | 0.73        | 0.49        | 0.86        | 0.92        | 0.79        | 0.92        | 0.94        | 0.82        | 0.54        | 0.00        | 0.07        | 0.93        | 0.83        | 0.17        | 0.89        | 0.84        | 0.81        | 0.35        | 0.69        | 0.92        |
| <b>Specificity</b>          | 0.99        | 1.00        | 1.00        | 1.00        | 1.00        | 0.99        | 0.99        | 1.00        | 0.99        | 0.99        | 1.00        | 1.00        | 1.00        | 1.00        | 0.99        | 1.00        | 1.00        | 0.99        | 1.00        | 1.00        | 1.00        | 1.00        | 0.99        |
| <b>Pos Pred Value</b>       | 0.99        | NA          | 0.84        | 0.82        | 0.53        | 0.76        | 0.93        | 0.82        | 0.90        | 0.95        | 0.88        | 0.76        | NaN         | 0.33        | 0.94        | 0.86        | 0.25        | 0.83        | 0.93        | 0.85        | 0.90        | 0.59        | 0.84        |
| <b>Neg Pred Value</b>       | 0.99        | NA          | 1.00        | 1.00        | 1.00        | 1.00        | 0.99        | 1.00        | 0.99        | 0.99        | 1.00        | 1.00        | 1.00        | 1.00        | 0.99        | 1.00        | 1.00        | 1.00        | 1.00        | 1.00        | 1.00        | 1.00        | 1.00        |
| <b>F1</b>                   | 0.98        | NA          | 0.76        | 0.77        | 0.51        | 0.81        | 0.93        | 0.80        | 0.91        | 0.95        | 0.85        | 0.63        | NA          | 0.12        | 0.94        | 0.85        | 0.20        | 0.86        | 0.88        | 0.83        | 0.51        | 0.64        | 0.88        |
| <b>Prevalence</b>           | 0.34        | 0.00        | 0.00        | 0.01        | 0.00        | 0.04        | 0.10        | 0.01        | 0.12        | 0.15        | 0.02        | 0.00        | 0.00        | 0.00        | 0.10        | 0.01        | 0.00        | 0.05        | 0.01        | 0.01        | 0.00        | 0.00        | 0.03        |
| <b>Detection Rate</b>       | 0.33        | 0.00        | 0.00        | 0.00        | 0.00        | 0.03        | 0.09        | 0.01        | 0.11        | 0.14        | 0.02        | 0.00        | 0.00        | 0.00        | 0.09        | 0.01        | 0.00        | 0.04        | 0.01        | 0.01        | 0.00        | 0.00        | 0.03        |
| <b>Detection Prevalence</b> | 0.33        | 0.00        | 0.00        | 0.01        | 0.00        | 0.04        | 0.10        | 0.01        | 0.13        | 0.15        | 0.02        | 0.00        | 0.00        | 0.00        | 0.10        | 0.01        | 0.00        | 0.05        | 0.01        | 0.01        | 0.00        | 0.00        | 0.04        |
| <b>Balanced Accuracy</b>    | 0.99        | NA          | 0.84        | 0.86        | 0.75        | 0.92        | 0.96        | 0.89        | 0.95        | 0.97        | 0.91        | 0.77        | 0.50        | 0.54        | 0.96        | 0.92        | 0.58        | 0.94        | 0.92        | 0.91        | 0.68        | 0.84        | 0.96        |

Caption: C00-C97 - Malignant neoplasms; D00-D09 - In situ neoplasms; D10-D36 - Benign neoplasms; D37-D48 - Neoplasms of uncertain or unknown behaviour; I05-I09 - Chronic rheumatic heart diseases; I10-I15 - Hypertensive diseases; I20-I25 - Ischaemic heart diseases; I26-I28 - Pulmonary heart disease and diseases of pulmonary circulation; I30-I52 - Other forms of heart disease; I60-I69 - Cerebrovascular diseases; I70-I79 - Diseases of arteries, arterioles and capillaries; I80-I89 - Diseases of veins, lymphatic vessels and lymph nodes, not elsewhere classified; I95-I99 - Other and unspecified disorders of the circulatory system; J00-J06 - Acute upper respiratory infections; J09-J18 - Influenza and pneumonia; J20-J22 - Other acute lower respiratory infections; J30-J39 - Other diseases of upper respiratory tract; J40-J47 - Chronic lower respiratory diseases; J60-J70 - Lung diseases due to external agents; J80-J84 - Other respiratory diseases principally affecting the interstitium; J85-J86 - Suppurative and necrotic conditions of lower respiratory tract; J90-J94 - Other diseases of pleura; J95-J99 - Other diseases of the respiratory system

### Periods without excess mortality

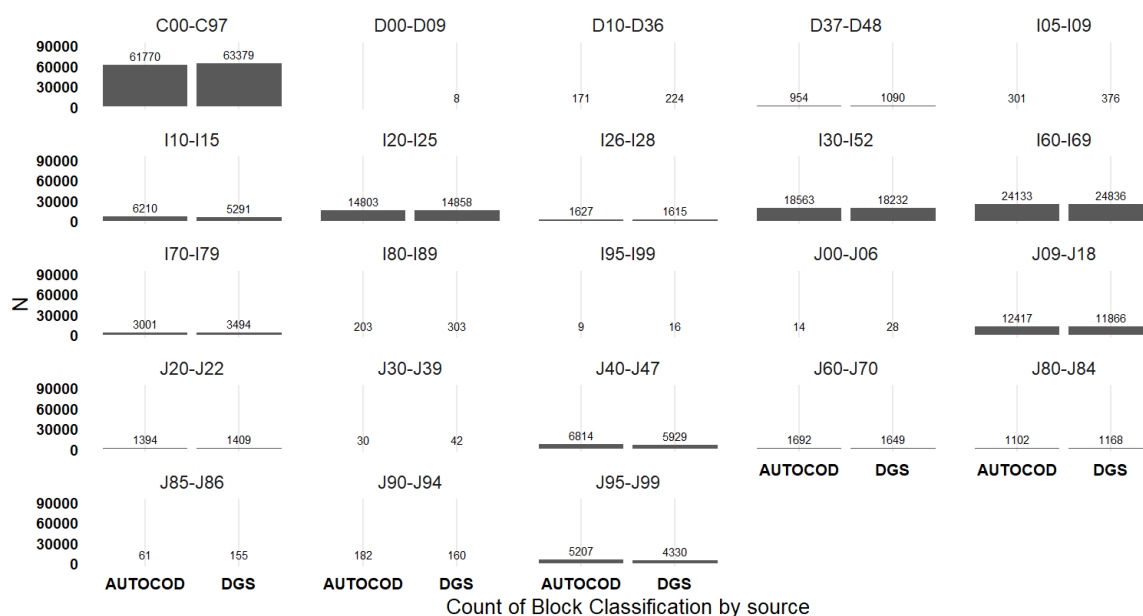

Supplementary Figure 28 - Count of death certificates classified by ICD-10 block either by human coders (DGS) or by AUTOCOD, in periods without excess mortality

Supplementary Table 44 - Confusion matrix for ICD-10 block classification, periods without excess mortality

|         |             | Human Coders (GOLD-STANDARD) |             |             |             |             |             |             |             |             |             |             |             |             |             |             |             |             |             |             |             |             |             |             |   |
|---------|-------------|------------------------------|-------------|-------------|-------------|-------------|-------------|-------------|-------------|-------------|-------------|-------------|-------------|-------------|-------------|-------------|-------------|-------------|-------------|-------------|-------------|-------------|-------------|-------------|---|
|         |             | C00-<br>C97                  | D00-<br>D09 | D10-<br>D36 | D37-<br>D48 | I05-<br>I09 | I10-<br>I15 | I20-<br>I25 | I26-<br>I28 | I30-<br>I52 | I60-<br>I69 | I70-<br>I79 | I80-<br>I89 | I95-<br>I99 | J00-<br>J06 | J09-<br>J18 | J20-<br>J22 | J30-<br>J39 | J40-<br>J47 | J60-<br>J70 | J80-<br>J84 | J85-<br>J86 | J90-<br>J94 | J95-<br>J99 |   |
| AUTOCOD | C00-<br>C97 | #####                        | 3           | 20          | 128         | 3           | 32          | 40          | 10          | 75          | 71          | 14          | 11          | 0           | 1           | 37          | 10          | 0           | 29          | 11          | 11          | 1           | 3           | 13          |   |
|         | D00-<br>D09 | 0                            | 0           | 0           | 0           | 0           | 0           | 0           | 0           | 0           | 0           | 0           | 0           | 0           | 0           | 0           | 0           | 0           | 0           | 0           | 0           | 0           | 0           | 0           |   |
|         | D10-<br>D36 | 17                           | 0           | 120         | 3           | 0           | 0           | 0           | 0           | 1           | 7           | 0           | 0           | 0           | 0           | 8           | 0           | 0           | 1           | 0           | 1           | 0           | 0           | 1           |   |
|         | D37-<br>D48 | 104                          | 0           | 0           | 716         | 1           | 2           | 2           | 0           | 4           | 7           | 1           | 0           | 0           | 0           | 8           | 0           | 1           | 9           | 0           | 4           | 0           | 1           | 5           |   |
|         | I05-<br>I09 | 3                            | 0           | 0           | 0           | 139         | 5           | 13          | 0           | 103         | 7           | 2           | 1           | 0           | 0           | 0           | 0           | 0           | 0           | 0           | 0           | 0           | 0           | 0           |   |
|         | I10-<br>I15 | 70                           | 0           | 4           | 7           | 8           | 4,055       | 251         | 56          | 213         | 335         | 157         | 7           | 0           | 0           | 37          | 0           | 0           | 61          | 22          | 20          | 0           | 3           | 36          |   |
|         | I20-<br>I25 | 77                           | 1           | 4           | 7           | 14          | 66          | 13,168      | 50          | 360         | 135         | 59          | 13          | 1           | 0           | 25          | 6           | 0           | 44          | 2           | 8           | 0           | 4           | 25          |   |
|         | I26-<br>I28 | 38                           | 0           | 1           | 5           | 7           | 20          | 24          | 1,205       | 107         | 10          | 16          | 11          | 0           | 0           | 8           | 0           | 0           | 18          | 0           | 9           | 0           | 4           | 6           |   |
|         | I30-<br>I52 | 149                          | 0           | 0           | 10          | 157         | 329         | 371         | 82          | 15,638      | 209         | 194         | 11          | 3           | 0           | 52          | 11          | 0           | 108         | 8           | 20          | 8           | 12          | 53          |   |
|         | I60-<br>I69 | 144                          | 0           | 13          | 23          | 7           | 95          | 121         | 20          | 323         | 21,916      | 65          | 11          | 1           | 1           | 125         | 93          | 4           | 79          | 30          | 10          | 6           | 2           | 65          |   |
|         | I70-<br>I79 | 47                           | 0           | 0           | 2           | 0           | 52          | 40          | 10          | 42          | 55          | 2,455       | 20          | 4           | 0           | 8           | 1           | 0           | 2           | 0           | 0           | 0           | 2           | 0           | 6 |
|         | I80-<br>I89 | 11                           | 0           | 0           | 0           | 0           | 2           | 0           | 4           | 6           | 9           | 4           | 121         | 1           | 0           | 1           | 0           | 0           | 0           | 0           | 0           | 0           | 0           | 2           | 1 |
|         | I95-<br>I99 | 0                            | 0           | 0           | 0           | 0           | 0           | 0           | 1           | 0           | 1           | 2           | 0           | 1           | 0           | 0           | 0           | 0           | 0           | 0           | 0           | 0           | 0           | 0           | 0 |
|         | J00-<br>J06 | 1                            | 0           | 0           | 0           | 0           | 0           | 0           | 0           | 0           | 0           | 1           | 0           | 0           | 0           | 7           | 0           | 0           | 0           | 0           | 0           | 0           | 0           | 0           | 1 |
|         | J09-<br>J18 | 200                          | 0           | 4           | 20          | 2           | 27          | 67          | 20          | 71          | 151         | 20          | 1           | 1           | 1           | 10,556      | 6           | 1           | 91          | 26          | 23          | 32          | 7           | 36          |   |
|         | J20-<br>J22 | 18                           | 0           | 0           | 0           | 1           | 0           | 1           | 0           | 7           | 43          | 4           | 0           | 0           | 1           | 7           | 1,114       | 0           | 63          | 1           | 1           | 1           | 0           | 14          |   |
|         | J30-<br>J39 | 0                            | 0           | 0           | 0           | 1           | 0           | 0           | 0           | 1           | 3           | 0           | 0           | 0           | 0           | 0           | 0           | 0           | 9           | 3           | 0           | 0           | 0           | 0           |   |
|         | J40-<br>J47 | 167                          | 0           | 1           | 35          | 0           | 36          | 47          | 27          | 119         | 147         | 7           | 2           | 0           | 1           | 223         | 64          | 2           | 5,039       | 48          | 48          | 33          | 5           | 59          |   |
|         | J60-<br>J70 | 23                           | 1           | 0           | 3           | 0           | 6           | 0           | 1           | 9           | 36          | 3           | 0           | 0           | 0           | 25          | 0           | 2           | 7           | 1,312       | 3           | 0           | 1           | 4           |   |
|         | J80-<br>J84 | 21                           | 0           | 1           | 1           | 0           | 5           | 13          | 5           | 17          | 1           | 0           | 2           | 0           | 0           | 15          | 4           | 0           | 12          | 14          | 896         | 1           | 0           | 4           |   |
|         | J85-<br>J86 | 3                            | 0           | 0           | 0           | 0           | 0           | 0           | 2           | 2           | 0           | 0           | 0           | 0           | 0           | 1           | 0           | 0           | 0           | 0           | 1           | 43          | 0           | 0           |   |
|         | J90-<br>J94 | 15                           | 0           | 0           | 2           | 0           | 1           | 0           | 0           | 17          | 3           | 0           | 1           | 0           | 0           | 7           | 5           | 0           | 0           | 3           | 0           | 0           | 93          | 0           |   |
|         | J95-<br>J99 | 115                          | 0           | 3           | 3           | 0           | 24          | 31          | 16          | 95          | 93          | 7           | 7           | 1           | 5           | 72          | 27          | 1           | 91          | 34          | 32          | 10          | 3           | 3,718       |   |

Caption: C00-C97 - Malignant neoplasms; D00-D09 - In situ neoplasms; D10-D36 - Benign neoplasms; D37-D48 - Neoplasms of uncertain or unknown behaviour; I05-I09 - Chronic rheumatic heart diseases; I10-I15 - Hypertensive diseases; I20-I25 - Ischaemic heart diseases; I26-I28 - Pulmonary heart disease and diseases of pulmonary circulation; I30-I52 - Other forms of heart disease; I60-I69 - Cerebrovascular diseases; I70-I79 - Diseases of arteries, arterioles and capillaries; I80-I89 - Diseases of veins, lymphatic vessels and lymph nodes, not elsewhere classified; I95-I99 - Other and unspecified disorders of the circulatory system; J00-J06 - Acute upper respiratory infections; J09-J18 - Influenza and pneumonia; J20-J22 - Other acute lower respiratory infections; J30-J39 - Other diseases of upper respiratory tract; J40-J47 - Chronic lower respiratory diseases; J60-J70 - Lung diseases due to external agents; J80-J84 - Other respiratory diseases principally affecting the interstitium; J85-J86 - Suppurative and necrotic conditions of lower respiratory tract; J90-J94 - Other diseases of pleura; J95-J99 - Other diseases of the respiratory system

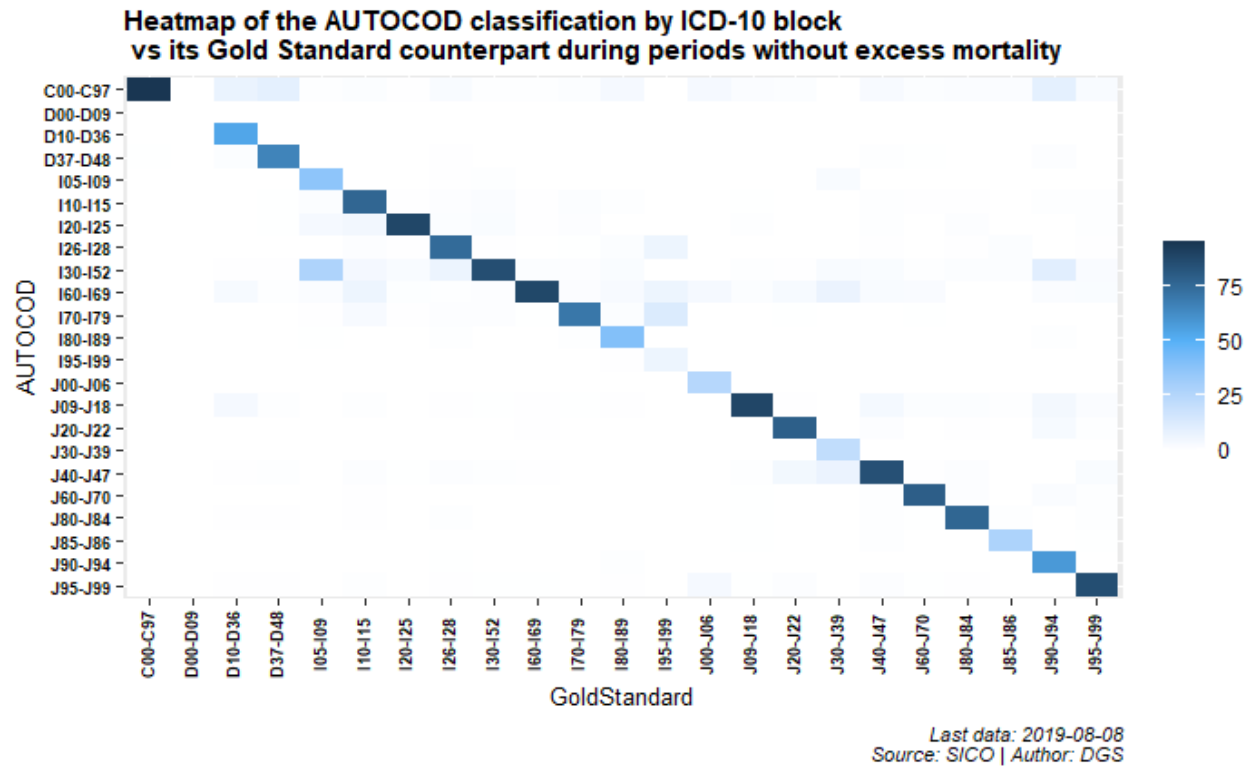

Supplementary Figure 29 - Heatmap of the AUTOCOD classification by ICD-10 block vs its Gold Standard counterpart. Values on the diagonal represent correct classifications, during periods without excess mortality

Caption: C00-C97 - Malignant neoplasms; D00-D09 - In situ neoplasms; D10-D36 - Benign neoplasms; D37-D48 - Neoplasms of uncertain or unknown behaviour; I05-I09 - Chronic rheumatic heart diseases; I10-I15 - Hypertensive diseases; I20-I25 - Ischaemic heart diseases; I26-I28 - Pulmonary heart disease and diseases of pulmonary circulation; I30-I52 - Other forms of heart disease; I60-I69 - Cerebrovascular diseases; I70-I79 - Diseases of arteries, arterioles and capillaries; I80-I89 - Diseases of veins, lymphatic vessels and lymph nodes, not elsewhere classified; I95-I99 - Other and unspecified disorders of the circulatory system; J00-J06 - Acute upper respiratory infections; J09-J18 - Influenza and pneumonia; J20-J22 - Other acute lower respiratory infections; J30-J39 - Other diseases of upper respiratory tract; J40-J47 - Chronic lower respiratory diseases; J60-J70 - Lung diseases due to external agents; J80-J84 - Other respiratory diseases principally affecting the interstitium; J85-J86 - Suppurative and necrotic conditions of lower respiratory tract; J90-J94 - Other diseases of pleura; J95-J99 - Other diseases of the respiratory system

Supplementary Table 45 - Overall performance metrics of AUTOCOD when classifying by ICD-10 block, periods without excess mortality

|                       |      |
|-----------------------|------|
| <b>Accuracy</b>       | 0.94 |
| <b>Kappa</b>          | 0.92 |
| <b>AccuracyLower</b>  | 0.94 |
| <b>AccuracyUpper</b>  | 0.94 |
| <b>AccuracyNull</b>   | 0.40 |
| <b>AccuracyPValue</b> | 0.00 |

Supplementary Table 46 - Performance Metrics of AUTOCOD by ICD-10 block, periods without excess mortality

|                      | C00-<br>C97 | D00-<br>D09 | D10-<br>D36 | D37-<br>D48 | I05-<br>I09 | I10-<br>I15 | I20-<br>I25 | I26-<br>I28 | I30-<br>I52 | I60-<br>I69 | I70-<br>I79 | I80-<br>I89 | I95-<br>I99 | J00-<br>J06 | J09-<br>J18 | J20-<br>J22 | J30-<br>J39 | J40-<br>J47 | J60-<br>J70 | J80-<br>J84 | J85-<br>J86 | J90-<br>J94 | J95-<br>J99 |
|----------------------|-------------|-------------|-------------|-------------|-------------|-------------|-------------|-------------|-------------|-------------|-------------|-------------|-------------|-------------|-------------|-------------|-------------|-------------|-------------|-------------|-------------|-------------|-------------|
| Sensitivity          | 0.98        | 0.00        | 0.70        | 0.74        | 0.41        | 0.85        | 0.93        | 0.80        | 0.91        | 0.94        | 0.82        | 0.55        | 0.08        | 0.41        | 0.94        | 0.83        | 0.45        | 0.89        | 0.87        | 0.82        | 0.31        | 0.66        | 0.92        |
| Specificity          | 0.99        | 1.00        | 1.00        | 1.00        | 1.00        | 0.99        | 0.99        | 1.00        | 0.99        | 0.99        | 1.00        | 1.00        | 1.00        | 1.00        | 0.99        | 1.00        | 1.00        | 0.99        | 1.00        | 1.00        | 1.00        | 1.00        | 1.00        |
| Pos Pred Value       | 0.99        | NaN         | 0.76        | 0.83        | 0.51        | 0.76        | 0.94        | 0.81        | 0.90        | 0.95        | 0.89        | 0.75        | 0.20        | 0.70        | 0.93        | 0.87        | 0.53        | 0.83        | 0.91        | 0.89        | 0.83        | 0.63        | 0.85        |
| Neg Pred Value       | 0.99        | 1.00        | 1.00        | 1.00        | 1.00        | 1.00        | 0.99        | 1.00        | 0.99        | 0.99        | 1.00        | 1.00        | 1.00        | 1.00        | 1.00        | 1.00        | 1.00        | 1.00        | 1.00        | 1.00        | 1.00        | 1.00        | 1.00        |
| F1                   | 0.99        | NA          | 0.73        | 0.78        | 0.45        | 0.80        | 0.93        | 0.80        | 0.90        | 0.95        | 0.85        | 0.64        | 0.11        | 0.52        | 0.94        | 0.85        | 0.49        | 0.86        | 0.89        | 0.85        | 0.46        | 0.65        | 0.88        |
| Prevalence           | 0.40        | 0.00        | 0.00        | 0.01        | 0.00        | 0.03        | 0.09        | 0.01        | 0.11        | 0.15        | 0.02        | 0.00        | 0.00        | 0.00        | 0.07        | 0.01        | 0.00        | 0.04        | 0.01        | 0.01        | 0.00        | 0.00        | 0.03        |
| Detection Rate       | 0.40        | 0.00        | 0.00        | 0.01        | 0.00        | 0.03        | 0.09        | 0.01        | 0.10        | 0.14        | 0.02        | 0.00        | 0.00        | 0.00        | 0.07        | 0.01        | 0.00        | 0.03        | 0.01        | 0.01        | 0.00        | 0.00        | 0.02        |
| Detection Prevalence | 0.40        | 0.00        | 0.00        | 0.01        | 0.00        | 0.04        | 0.09        | 0.01        | 0.11        | 0.15        | 0.02        | 0.00        | 0.00        | 0.00        | 0.08        | 0.01        | 0.00        | 0.04        | 0.01        | 0.01        | 0.00        | 0.00        | 0.03        |
| Balanced Accuracy    | 0.99        | 0.50        | 0.85        | 0.87        | 0.70        | 0.92        | 0.96        | 0.90        | 0.95        | 0.97        | 0.91        | 0.78        | 0.54        | 0.71        | 0.97        | 0.92        | 0.73        | 0.94        | 0.93        | 0.91        | 0.66        | 0.83        | 0.96        |

Periods with severe excess mortality (>4 SDs)

Supplementary Table 47 - Confusion matrix for ICD-10 block classification, severe excess mortality periods (>4 SDs)

|             |             | Human Coders (GOLD-STANDARD) |             |             |             |             |             |             |             |             |             |             |             |             |             |             |             |             |             |             |             |             |             |             |   |
|-------------|-------------|------------------------------|-------------|-------------|-------------|-------------|-------------|-------------|-------------|-------------|-------------|-------------|-------------|-------------|-------------|-------------|-------------|-------------|-------------|-------------|-------------|-------------|-------------|-------------|---|
|             |             | C00-<br>C97                  | D00-<br>D09 | D10-<br>D36 | D37-<br>D48 | I05-<br>I09 | I10-<br>I15 | I20-<br>I25 | I26-<br>I28 | I30-<br>I52 | I60-<br>I69 | I70-<br>I79 | I80-<br>I89 | I95-<br>I99 | J00-<br>J06 | J09-<br>J18 | J20-<br>J22 | J30-<br>J39 | J40-<br>J47 | J60-<br>J70 | J80-<br>J84 | J85-<br>J86 | J90-<br>J94 | J95-<br>J99 |   |
| AUTOCOD     | C00-<br>C97 | 5,614                        | 0           | 3           | 13          | 0           | 4           | 11          | 1           | 14          | 16          | 3           | 2           | 0           | 0           | 6           | 1           | 0           | 1           | 1           | 1           | 0           | 1           | 3           |   |
|             | D00-<br>D09 | 0                            | 0           | 0           | 0           | 0           | 0           | 0           | 0           | 0           | 0           | 0           | 0           | 0           | 0           | 0           | 0           | 0           | 0           | 0           | 0           | 0           | 0           | 0           |   |
|             | D10-<br>D36 | 0                            | 0           | 13          | 0           | 0           | 0           | 0           | 0           | 0           | 1           | 0           | 0           | 0           | 0           | 0           | 0           | 0           | 0           | 0           | 0           | 0           | 0           | 0           | 0 |
|             | D37-<br>D48 | 19                           | 0           | 0           | 84          | 1           | 1           | 0           | 0           | 0           | 2           | 0           | 0           | 0           | 0           | 0           | 0           | 0           | 0           | 0           | 0           | 0           | 0           | 0           | 3 |
|             | I05-<br>I09 | 1                            | 0           | 0           | 0           | 24          | 3           | 0           | 0           | 12          | 1           | 0           | 0           | 0           | 0           | 0           | 0           | 0           | 0           | 1           | 0           | 0           | 0           | 0           | 0 |
|             | I10-<br>I15 | 8                            | 0           | 0           | 1           | 1           | 617         | 35          | 8           | 30          | 45          | 21          | 2           | 0           | 0           | 7           | 0           | 0           | 11          | 3           | 2           | 0           | 0           | 0           | 5 |
|             | I20-<br>I25 | 10                           | 0           | 0           | 0           | 0           | 6           | 1,831       | 9           | 30          | 18          | 5           | 0           | 1           | 0           | 5           | 1           | 1           | 6           | 1           | 0           | 1           | 0           | 0           | 0 |
|             | I26-<br>I28 | 5                            | 0           | 0           | 0           | 0           | 4           | 5           | 157         | 10          | 2           | 2           | 1           | 0           | 0           | 0           | 0           | 0           | 5           | 0           | 3           | 0           | 1           | 2           | 2 |
|             | I30-<br>I52 | 24                           | 0           | 0           | 2           | 12          | 41          | 50          | 15          | 2,172       | 38          | 17          | 4           | 0           | 0           | 11          | 4           | 0           | 28          | 1           | 5           | 0           | 2           | 7           | 7 |
|             | I60-<br>I69 | 11                           | 0           | 0           | 3           | 0           | 10          | 19          | 1           | 23          | 2,767       | 6           | 0           | 0           | 0           | 23          | 10          | 1           | 5           | 5           | 2           | 0           | 0           | 0           | 7 |
|             | I70-<br>I79 | 11                           | 0           | 0           | 0           | 0           | 4           | 4           | 2           | 5           | 10          | 308         | 4           | 2           | 0           | 0           | 0           | 0           | 0           | 0           | 0           | 0           | 0           | 0           | 1 |
|             | I80-<br>I89 | 1                            | 0           | 0           | 0           | 0           | 0           | 0           | 2           | 1           | 0           | 0           | 19          | 0           | 0           | 0           | 0           | 0           | 0           | 0           | 0           | 0           | 0           | 0           | 0 |
|             | I95-<br>I99 | 0                            | 0           | 0           | 0           | 0           | 0           | 0           | 0           | 0           | 0           | 0           | 0           | 0           | 0           | 0           | 0           | 0           | 0           | 0           | 0           | 0           | 0           | 0           | 0 |
|             | J00-<br>J06 | 0                            | 0           | 0           | 0           | 0           | 0           | 0           | 0           | 0           | 0           | 0           | 0           | 0           | 0           | 0           | 0           | 0           | 0           | 0           | 0           | 0           | 0           | 0           | 1 |
|             | J09-<br>J18 | 28                           | 0           | 1           | 3           | 0           | 6           | 13          | 2           | 11          | 24          | 1           | 0           | 0           | 1           | 1,954       | 1           | 0           | 19          | 4           | 1           | 8           | 1           | 4           | 4 |
|             | J20-<br>J22 | 1                            | 0           | 0           | 0           | 0           | 1           | 0           | 0           | 2           | 3           | 0           | 0           | 0           | 0           | 2           | 202         | 0           | 13          | 0           | 0           | 0           | 0           | 0           | 4 |
|             | J30-<br>J39 | 0                            | 0           | 0           | 0           | 0           | 0           | 0           | 0           | 0           | 1           | 0           | 0           | 0           | 0           | 0           | 0           | 0           | 1           | 0           | 0           | 0           | 0           | 0           | 0 |
|             | J40-<br>J47 | 18                           | 0           | 0           | 7           | 0           | 8           | 12          | 2           | 21          | 17          | 0           | 0           | 0           | 2           | 56          | 14          | 1           | 924         | 8           | 7           | 2           | 0           | 14          |   |
|             | J60-<br>J70 | 0                            | 0           | 0           | 0           | 0           | 1           | 0           | 0           | 1           | 9           | 0           | 0           | 0           | 0           | 4           | 0           | 0           | 0           | 164         | 0           | 0           | 0           | 1           |   |
|             | J80-<br>J84 | 2                            | 0           | 0           | 0           | 0           | 0           | 1           | 1           | 5           | 0           | 0           | 0           | 0           | 0           | 6           | 0           | 0           | 1           | 4           | 109         | 0           | 0           | 2           |   |
|             | J85-<br>J86 | 1                            | 0           | 0           | 0           | 0           | 0           | 0           | 0           | 0           | 0           | 0           | 0           | 0           | 0           | 0           | 0           | 0           | 0           | 0           | 0           | 1           | 0           | 0           |   |
|             | J90-<br>J94 | 0                            | 0           | 0           | 0           | 0           | 0           | 0           | 0           | 2           | 0           | 0           | 0           | 0           | 0           | 3           | 0           | 0           | 0           | 0           | 0           | 0           | 12          | 0           |   |
| J95-<br>J99 | 14          | 0                            | 1           | 0           | 0           | 4           | 10          | 4           | 12          | 12          | 1           | 1           | 0           | 3           | 23          | 6           | 0           | 12          | 4           | 8           | 0           | 0           | 630         |             |   |



Caption: C00-C97 - Malignant neoplasms; D00-D09 - In situ neoplasms; D10-D36 - Benign neoplasms; D37-D48 - Neoplasms of uncertain or unknown behaviour; I05-I09 - Chronic rheumatic heart diseases; I10-I15 - Hypertensive diseases; I20-I25 - Ischaemic heart diseases; I26-I28 - Pulmonary heart disease and diseases of pulmonary circulation; I30-I52 - Other forms of heart disease; I60-I69 - Cerebrovascular diseases; I70-I79 - Diseases of arteries, arterioles and capillaries; I80-I89 - Diseases of veins, lymphatic vessels and lymph nodes, not elsewhere classified; I95-I99 - Other and unspecified disorders of the circulatory system; J00-J06 - Acute upper respiratory infections; J09-J18 - Influenza and pneumonia; J20-J22 - Other acute lower respiratory infections; J30-J39 - Other diseases of upper respiratory tract; J40-J47 - Chronic lower respiratory diseases; J60-J70 - Lung diseases due to external agents; J80-J84 - Other respiratory diseases principally affecting the interstitium; J85-J86 - Suppurative and necrotic conditions of lower respiratory tract; J90-J94 - Other diseases of pleura; J95-J99 - Other diseases of the respiratory system

### Heatmap of the AUTOCOD classification by ICD-10 block vs its Gold Standard counterpart, during severe excess mortality periods (>4 SD)

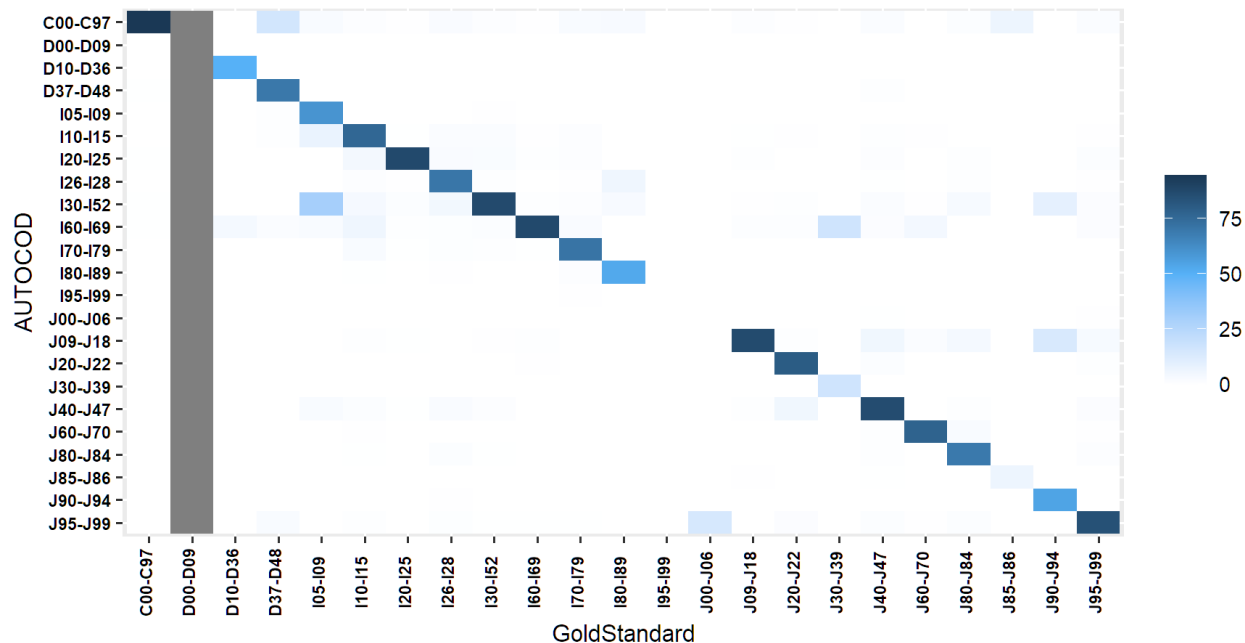

Last data: 2019-08-08  
Source: SICO | Author: DGS

Supplementary Figure 30 - Heatmap of the AUTOCOD classification by ICD-10 block vs its Gold Standard counterpart. Values on the diagonal represent correct classifications

Supplementary Table 48 - Overall performance metrics of AUTOCOD when classifying by ICD-10 block, severe excess mortality periods (>4 SDs)

|                       |      |
|-----------------------|------|
| <b>Accuracy</b>       | 0.93 |
| <b>Kappa</b>          | 0.91 |
| <b>AccuracyLower</b>  | 0.92 |
| <b>AccuracyUpper</b>  | 0.93 |
| <b>AccuracyNull</b>   | 0.30 |
| <b>AccuracyPValue</b> | 0.00 |

Supplementary Table 49 - Performance Metrics of AUTOCOD by ICD-10 block, severe excess mortality periods (>4 SDs)

|                             | C00-<br>C97 | D00-<br>D09 | D10-<br>D36 | D37-<br>D48 | I05-<br>I09 | I10-<br>I15 | I20-<br>I25 | I26-<br>I28 | I30-<br>I52 | I60-<br>I69 | I70-<br>I79 | I80-<br>I89 | I95-<br>I99 | J00-<br>J06 | J09-<br>J18 | J20-<br>J22 | J30-<br>J39 | J40-<br>J47 | J60-<br>J70 | J80-<br>J84 | J85-<br>J86 | J90-<br>J94 | J95-<br>J99 |
|-----------------------------|-------------|-------------|-------------|-------------|-------------|-------------|-------------|-------------|-------------|-------------|-------------|-------------|-------------|-------------|-------------|-------------|-------------|-------------|-------------|-------------|-------------|-------------|-------------|
| <b>Sensitivity</b>          | 0.97        | NA          | 0.72        | 0.74        | 0.63        | 0.87        | 0.92        | 0.77        | 0.92        | 0.93        | 0.85        | 0.58        | 0.00        | 0.00        | 0.93        | 0.85        | 0.25        | 0.90        | 0.84        | 0.79        | 0.08        | 0.71        | 0.92        |
| <b>Specificity</b>          | 0.99        | 1.00        | 1.00        | 1.00        | 1.00        | 0.99        | 0.99        | 1.00        | 0.98        | 0.99        | 1.00        | 1.00        | 1.00        | 1.00        | 0.99        | 1.00        | 1.00        | 0.99        | 1.00        | 1.00        | 1.00        | 1.00        | 0.99        |
| <b>Pos Pred Value</b>       | 0.99        | NA          | 0.93        | 0.76        | 0.57        | 0.78        | 0.95        | 0.80        | 0.89        | 0.96        | 0.88        | 0.83        | NA          | 0.00        | 0.94        | 0.89        | 0.50        | 0.83        | 0.91        | 0.83        | 0.50        | 0.71        | 0.85        |
| <b>Neg Pred Value</b>       | 0.99        | NA          | 1.00        | 1.00        | 1.00        | 1.00        | 0.99        | 1.00        | 0.99        | 0.99        | 1.00        | 1.00        | 1.00        | 1.00        | 0.99        | 1.00        | 1.00        | 0.99        | 1.00        | 1.00        | 1.00        | 1.00        | 1.00        |
| <b>F1</b>                   | 0.98        | NA          | 0.81        | 0.75        | 0.60        | 0.82        | 0.94        | 0.78        | 0.91        | 0.95        | 0.86        | 0.68        | NA          | NA          | 0.93        | 0.87        | 0.33        | 0.86        | 0.88        | 0.81        | 0.14        | 0.71        | 0.88        |
| <b>Prevalence</b>           | 0.30        | 0.00        | 0.00        | 0.01        | 0.00        | 0.04        | 0.11        | 0.01        | 0.12        | 0.16        | 0.02        | 0.00        | 0.00        | 0.00        | 0.11        | 0.01        | 0.00        | 0.05        | 0.01        | 0.01        | 0.00        | 0.00        | 0.04        |
| <b>Detection Rate</b>       | 0.30        | 0.00        | 0.00        | 0.00        | 0.00        | 0.03        | 0.10        | 0.01        | 0.11        | 0.15        | 0.02        | 0.00        | 0.00        | 0.00        | 0.10        | 0.01        | 0.00        | 0.05        | 0.01        | 0.01        | 0.00        | 0.00        | 0.03        |
| <b>Detection Prevalence</b> | 0.30        | 0.00        | 0.00        | 0.01        | 0.00        | 0.04        | 0.10        | 0.01        | 0.13        | 0.15        | 0.02        | 0.00        | 0.00        | 0.00        | 0.11        | 0.01        | 0.00        | 0.06        | 0.01        | 0.01        | 0.00        | 0.00        | 0.04        |
| <b>Balanced Accuracy</b>    | 0.98        | NA          | 0.86        | 0.87        | 0.82        | 0.93        | 0.96        | 0.88        | 0.95        | 0.96        | 0.92        | 0.79        | 0.50        | 0.50        | 0.96        | 0.92        | 0.63        | 0.95        | 0.92        | 0.89        | 0.54        | 0.85        | 0.96        |

Caption: C00-C97 - Malignant neoplasms; D00-D09 - In situ neoplasms; D10-D36 - Benign neoplasms; D37-D48 - Neoplasms of uncertain or unknown behaviour; I05-I09 - Chronic rheumatic heart diseases; I10-I15 - Hypertensive diseases; I20-I25 - Ischaemic heart diseases; I26-I28 - Pulmonary heart disease and diseases of pulmonary circulation; I30-I52 - Other forms of heart disease; I60-I69 - Cerebrovascular diseases; I70-I79 - Diseases of arteries, arterioles and capillaries; I80-I89 - Diseases of veins, lymphatic vessels and lymph nodes, not elsewhere classified; I95-I99 - Other and unspecified disorders of the circulatory system; J00-J06 - Acute upper respiratory infections; J09-J18 - Influenza and pneumonia; J20-J22 - Other acute lower respiratory infections; J30-J39 - Other diseases of upper respiratory tract; J40-J47 - Chronic lower respiratory diseases; J60-J70 - Lung diseases due to external agents; J80-J84 - Other respiratory diseases principally affecting the interstitium; J85-J86 - Suppurative and necrotic conditions of lower respiratory tract; J90-J94 - Other diseases of pleura; J95-J99 - Other diseases of the respiratory system

Periods with extreme excess mortality (>6 SDs)

Supplementary Table 50 - Confusion matrix for ICD-10 block classification, extreme excess mortality periods (>6 SDs)

|         |             | Human Coders (GOLD-STANDARD) |             |             |             |             |             |             |             |             |             |             |             |             |             |             |             |             |             |             |             |             |             |             |
|---------|-------------|------------------------------|-------------|-------------|-------------|-------------|-------------|-------------|-------------|-------------|-------------|-------------|-------------|-------------|-------------|-------------|-------------|-------------|-------------|-------------|-------------|-------------|-------------|-------------|
|         |             | C00-<br>C97                  | D00-<br>D09 | D10-<br>D36 | D37-<br>D48 | I05-<br>I09 | I10-<br>I15 | I20-<br>I25 | I26-<br>I28 | I30-<br>I52 | I60-<br>I69 | I70-<br>I79 | I80-<br>I89 | I95-<br>I99 | J00-<br>J06 | J09-<br>J18 | J20-<br>J22 | J30-<br>J39 | J40-<br>J47 | J60-<br>J70 | J80-<br>J84 | J85-<br>J86 | J90-<br>J94 | J95-<br>J99 |
| AUTOCOD | C00-<br>C97 | 1,085                        | 0           | 0           | 1           | 0           | 1           | 1           | 0           | 4           | 4           | 0           | 0           | 0           | 0           | 2           | 0           | 0           | 0           | 1           | 1           | 0           | 1           | 1           |
|         | D00-<br>D09 | 0                            | 0           | 0           | 0           | 0           | 0           | 0           | 0           | 0           | 0           | 0           | 0           | 0           | 0           | 0           | 0           | 0           | 0           | 0           | 0           | 0           | 0           | 0           |
|         | D10-<br>D36 | 0                            | 0           | 4           | 0           | 0           | 0           | 0           | 0           | 0           | 0           | 0           | 0           | 0           | 0           | 0           | 0           | 0           | 0           | 0           | 0           | 0           | 0           | 0           |
|         | D37-<br>D48 | 9                            | 0           | 0           | 13          | 0           | 0           | 0           | 0           | 0           | 1           | 0           | 0           | 0           | 0           | 0           | 0           | 0           | 0           | 0           | 0           | 0           | 0           | 1           |
|         | I05-<br>I09 | 0                            | 0           | 0           | 0           | 2           | 0           | 0           | 0           | 2           | 0           | 0           | 0           | 0           | 0           | 0           | 0           | 0           | 0           | 0           | 0           | 0           | 0           | 0           |
|         | I10-<br>I15 | 2                            | 0           | 0           | 1           | 0           | 116         | 6           | 1           | 7           | 8           | 3           | 0           | 0           | 0           | 4           | 0           | 0           | 0           | 1           | 0           | 0           | 0           | 0           |
|         | I20-<br>I25 | 3                            | 0           | 0           | 0           | 0           | 3           | 412         | 3           | 9           | 5           | 1           | 0           | 0           | 0           | 0           | 1           | 0           | 4           | 0           | 0           | 0           | 0           | 0           |
|         | I26-<br>I28 | 2                            | 0           | 0           | 0           | 0           | 1           | 2           | 32          | 2           | 1           | 1           | 0           | 0           | 0           | 0           | 0           | 0           | 0           | 0           | 0           | 0           | 0           | 0           |
|         | I30-<br>I52 | 2                            | 0           | 0           | 0           | 1           | 6           | 9           | 4           | 458         | 8           | 7           | 1           | 0           | 0           | 3           | 0           | 0           | 5           | 0           | 0           | 0           | 1           | 4           |
|         | I60-<br>I69 | 1                            | 0           | 0           | 0           | 0           | 2           | 8           | 0           | 5           | 544         | 1           | 0           | 0           | 0           | 2           | 1           | 0           | 3           | 0           | 0           | 0           | 0           | 1           |
|         | I70-<br>I79 | 2                            | 0           | 0           | 0           | 0           | 1           | 1           | 0           | 1           | 2           | 72          | 0           | 0           | 0           | 0           | 0           | 0           | 0           | 0           | 0           | 0           | 0           | 0           |
|         | I80-<br>I89 | 0                            | 0           | 0           | 0           | 0           | 0           | 0           | 0           | 0           | 0           | 0           | 2           | 0           | 0           | 0           | 0           | 0           | 0           | 0           | 0           | 0           | 0           | 0           |
|         | I95-<br>I99 | 0                            | 0           | 0           | 0           | 0           | 0           | 0           | 0           | 0           | 0           | 0           | 0           | 0           | 0           | 0           | 0           | 0           | 0           | 0           | 0           | 0           | 0           | 0           |
|         | J00-<br>J06 | 0                            | 0           | 0           | 0           | 0           | 0           | 0           | 0           | 0           | 0           | 0           | 0           | 0           | 0           | 0           | 0           | 0           | 0           | 0           | 0           | 0           | 0           | 0           |
|         | J09-<br>J18 | 6                            | 0           | 0           | 1           | 0           | 0           | 2           | 0           | 2           | 7           | 0           | 0           | 0           | 0           | 419         | 0           | 0           | 3           | 0           | 0           | 0           | 0           | 1           |
|         | J20-<br>J22 | 0                            | 0           | 0           | 0           | 0           | 0           | 0           | 0           | 1           | 1           | 0           | 0           | 0           | 0           | 0           | 51          | 0           | 2           | 0           | 0           | 0           | 0           | 0           |
|         | J30-<br>J39 | 0                            | 0           | 0           | 0           | 0           | 0           | 0           | 0           | 0           | 0           | 0           | 0           | 0           | 0           | 0           | 0           | 0           | 0           | 0           | 0           | 0           | 0           | 0           |
|         | J40-<br>J47 | 4                            | 0           | 0           | 1           | 0           | 2           | 5           | 0           | 6           | 2           | 0           | 0           | 0           | 0           | 11          | 3           | 0           | 197         | 3           | 0           | 1           | 0           | 5           |
|         | J60-<br>J70 | 0                            | 0           | 0           | 0           | 0           | 0           | 0           | 0           | 0           | 2           | 0           | 0           | 0           | 0           | 0           | 0           | 0           | 0           | 31          | 0           | 0           | 0           | 0           |
|         | J80-<br>J84 | 1                            | 0           | 0           | 0           | 0           | 0           | 0           | 0           | 0           | 0           | 0           | 0           | 0           | 0           | 4           | 0           | 0           | 0           | 1           | 21          | 0           | 0           | 0           |
|         | J85-<br>J86 | 0                            | 0           | 0           | 0           | 0           | 0           | 0           | 0           | 0           | 0           | 0           | 0           | 0           | 0           | 0           | 0           | 0           | 0           | 0           | 0           | 0           | 0           | 0           |
|         | J90-<br>J94 | 0                            | 0           | 0           | 0           | 0           | 0           | 0           | 0           | 1           | 0           | 0           | 0           | 0           | 0           | 0           | 0           | 0           | 0           | 0           | 0           | 0           | 2           | 0           |
|         | J95-<br>J99 | 0                            | 0           | 1           | 0           | 0           | 1           | 1           | 0           | 2           | 3           | 1           | 1           | 0           | 1           | 5           | 1           | 0           | 7           | 1           | 2           | 0           | 0           | 133         |

Caption: C00-C97 - Malignant neoplasms; D00-D09 - In situ neoplasms; D10-D36 - Benign neoplasms; D37-D48 - Neoplasms of uncertain or unknown behaviour; I05-I09 - Chronic rheumatic heart diseases; I10-I15 - Hypertensive diseases; I20-I25 - Ischaemic heart diseases; I26-I28 - Pulmonary heart disease and diseases of pulmonary circulation; I30-I52 - Other forms of heart disease; I60-I69 - Cerebrovascular diseases; I70-I79 - Diseases of arteries, arterioles and capillaries; I80-I89 - Diseases of veins, lymphatic vessels and lymph nodes, not elsewhere classified; I95-I99 - Other and unspecified disorders of the circulatory system; J00-J06 - Acute upper respiratory infections; J09-J18 - Influenza and pneumonia; J20-J22 - Other acute lower respiratory infections; J30-J39 - Other diseases of upper respiratory tract; J40-J47 - Chronic lower respiratory diseases; J60-J70 - Lung diseases due to external agents; J80-J84 - Other respiratory diseases principally affecting the interstitium; J85-J86 - Suppurative and necrotic conditions of lower respiratory tract; J90-J94 - Other diseases of pleura; J95-J99 - Other diseases of the respiratory system

**Heatmap of the AUTOCOD classification by ICD-10 block vs its Gold Standard counterpart during extreme excess mortality periods (>6 SD)**

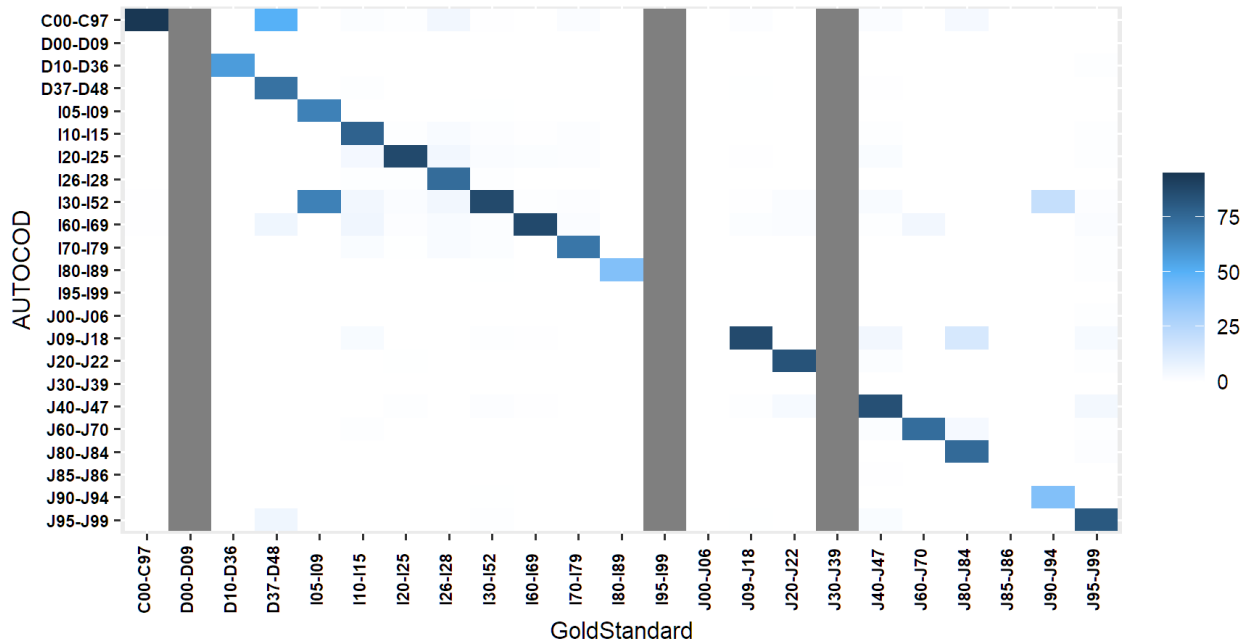

Last data: 2019-08-08  
Source: SICO | Author: DGS

Supplementary Figure 31 - Heatmap of the AUTOCOD classification by ICD-10 block vs its Gold Standard counterpart. Values on the diagonal represent correct classifications, during extreme excess mortality periods (>6 SDs)

Caption: C00-C97 - Malignant neoplasms; D00-D09 - In situ neoplasms; D10-D36 - Benign neoplasms; D37-D48 - Neoplasms of uncertain or unknown behaviour; I05-I09 - Chronic rheumatic heart diseases; I10-I15 - Hypertensive diseases; I20-I25 - Ischaemic heart diseases; I26-I28 - Pulmonary heart disease and diseases of pulmonary circulation; I30-I52 - Other forms of heart disease; I60-I69 - Cerebrovascular diseases; I70-I79 - Diseases of arteries, arterioles and capillaries; I80-I89 - Diseases of veins, lymphatic vessels and lymph nodes, not elsewhere classified; I95-I99 - Other and unspecified disorders of the circulatory system; J00-J06 - Acute upper respiratory infections; J09-J18 - Influenza and pneumonia; J20-J22 - Other acute lower respiratory infections; J30-J39 - Other diseases of upper respiratory tract; J40-J47 - Chronic lower respiratory diseases; J60-J70 - Lung diseases due to external agents; J80-J84 - Other respiratory diseases principally affecting the interstitium; J85-J86 - Suppurative and necrotic conditions of lower respiratory tract; J90-J94 - Other diseases of pleura; J95-J99 - Other diseases of the respiratory system

Supplementary Table 51 - - Overall performance metrics of AUTOCOD when classifying by ICD-10 block, extreme excess mortality periods (>6 SDs)

|                       |      |
|-----------------------|------|
| <b>Accuracy</b>       | 0.93 |
| <b>Kappa</b>          | 0.91 |
| <b>AccuracyLower</b>  | 0.92 |
| <b>AccuracyUpper</b>  | 0.93 |
| <b>AccuracyNull</b>   | 0.29 |
| <b>AccuracyPValue</b> | 0.00 |

Supplementary Table 52 - Performance Metrics of AUTOCOD by ICD-10 block, extreme excess mortality periods (>6 SDs)

|                      | Chapter II - Neoplasms |             |             |             | Chapter IX - Diseases of the circulatory system |             |             |             |             |             |             |             |             | Chapter X - Diseases of the respiratory system |             |             |             |             |             |             |             |             |             |
|----------------------|------------------------|-------------|-------------|-------------|-------------------------------------------------|-------------|-------------|-------------|-------------|-------------|-------------|-------------|-------------|------------------------------------------------|-------------|-------------|-------------|-------------|-------------|-------------|-------------|-------------|-------------|
|                      | C00-<br>C97            | D00-<br>D09 | D10-<br>D36 | D37-<br>D48 | I05-<br>I09                                     | I10-<br>I15 | I20-<br>I25 | I26-<br>I28 | I30-<br>I52 | I60-<br>I69 | I70-<br>I79 | I80-<br>I89 | I95-<br>I99 | J00-<br>J06                                    | J09-<br>J18 | J20-<br>J22 | J30-<br>J39 | J40-<br>J47 | J60-<br>J70 | J80-<br>J84 | J85-<br>J86 | J90-<br>J94 | J95-<br>J99 |
| Sensitivity          | 0.97                   | NA          | 0.80        | 0.77        | 0.67                                            | 0.87        | 0.92        | 0.80        | 0.92        | 0.93        | 0.84        | 0.50        | NA          | 0.00                                           | 0.93        | 0.90        | NA          | 0.89        | 0.82        | 0.88        | 0.00        | 0.50        | 0.91        |
| Specificity          | 0.99                   | 1.00        | 1.00        | 1.00        | 1.00                                            | 0.99        | 0.99        | 1.00        | 0.99        | 0.99        | 1.00        | 1.00        | 1.00        | 1.00                                           | 0.99        | 1.00        | 1.00        | 0.99        | 1.00        | 1.00        | 1.00        | 1.00        | 0.99        |
| Pos Pred Value       | 0.99                   | NA          | 1.00        | 0.54        | 0.50                                            | 0.78        | 0.93        | 0.78        | 0.90        | 0.96        | 0.91        | 1.00        | NA          | NA                                             | 0.95        | 0.93        | NA          | 0.82        | 0.94        | 0.78        | NA          | 0.67        | 0.83        |
| Neg Pred Value       | 0.99                   | NA          | 1.00        | 1.00        | 1.00                                            | 1.00        | 0.99        | 1.00        | 0.99        | 0.99        | 1.00        | 1.00        | NA          | 1.00                                           | 0.99        | 1.00        | NA          | 0.99        | 1.00        | 1.00        | 1.00        | 1.00        | 1.00        |
| F1                   | 0.98                   | NA          | 0.89        | 0.63        | 0.57                                            | 0.82        | 0.93        | 0.79        | 0.91        | 0.94        | 0.87        | 0.67        | NA          | NA                                             | 0.94        | 0.91        | NA          | 0.86        | 0.87        | 0.82        | NA          | 0.57        | 0.87        |
| Prevalence           | 0.29                   | 0.00        | 0.00        | 0.00        | 0.00                                            | 0.03        | 0.12        | 0.01        | 0.13        | 0.15        | 0.02        | 0.00        | 0.00        | 0.00                                           | 0.12        | 0.02        | 0.00        | 0.06        | 0.01        | 0.01        | 0.00        | 0.00        | 0.04        |
| Detection Rate       | 0.28                   | 0.00        | 0.00        | 0.00        | 0.00                                            | 0.03        | 0.11        | 0.01        | 0.12        | 0.14        | 0.02        | 0.00        | 0.00        | 0.00                                           | 0.11        | 0.01        | 0.00        | 0.05        | 0.01        | 0.01        | 0.00        | 0.00        | 0.03        |
| Detection Prevalence | 0.28                   | 0.00        | 0.00        | 0.01        | 0.00                                            | 0.04        | 0.11        | 0.01        | 0.13        | 0.15        | 0.02        | 0.00        | 0.00        | 0.00                                           | 0.11        | 0.01        | 0.00        | 0.06        | 0.01        | 0.01        | 0.00        | 0.00        | 0.04        |
| Balanced Accuracy    | 0.98                   | NA          | 0.90        | 0.88        | 0.83                                            | 0.93        | 0.96        | 0.90        | 0.95        | 0.96        | 0.92        | 0.75        | NA          | 0.50                                           | 0.96        | 0.95        | NA          | 0.94        | 0.91        | 0.94        | 0.50        | 0.75        | 0.95        |

Caption: C00-C97 - Malignant neoplasms; D00-D09 - In situ neoplasms; D10-D36 - Benign neoplasms; D37-D48 - Neoplasms of uncertain or unknown behaviour; I05-I09 - Chronic rheumatic heart diseases; I10-I15 - Hypertensive diseases; I20-I25 - Ischaemic heart diseases; I26-I28 - Pulmonary heart disease and diseases of pulmonary circulation; I30-I52 - Other forms of heart disease; I60-I69 - Cerebrovascular diseases; I70-I79 - Diseases of arteries, arterioles and capillaries; I80-I89 - Diseases of veins, lymphatic vessels and lymph nodes, not elsewhere classified; I95-I99 - Other and unspecified disorders of the circulatory system; J00-J06 - Acute upper respiratory infections; J09-J18 - Influenza and pneumonia; J20-J22 - Other acute lower respiratory infections; J30-J39 - Other diseases of upper respiratory tract; J40-J47 - Chronic lower respiratory diseases; J60-J70 - Lung diseases due to external agents; J80-J84 - Other respiratory diseases principally affecting the interstitium; J85-J86 - Suppurative and necrotic conditions of lower respiratory tract; J90-J94 - Other diseases of pleura; J95-J99 - Other diseases of the respiratory system

### Difference between excess mortality periods and periods without excess mortality

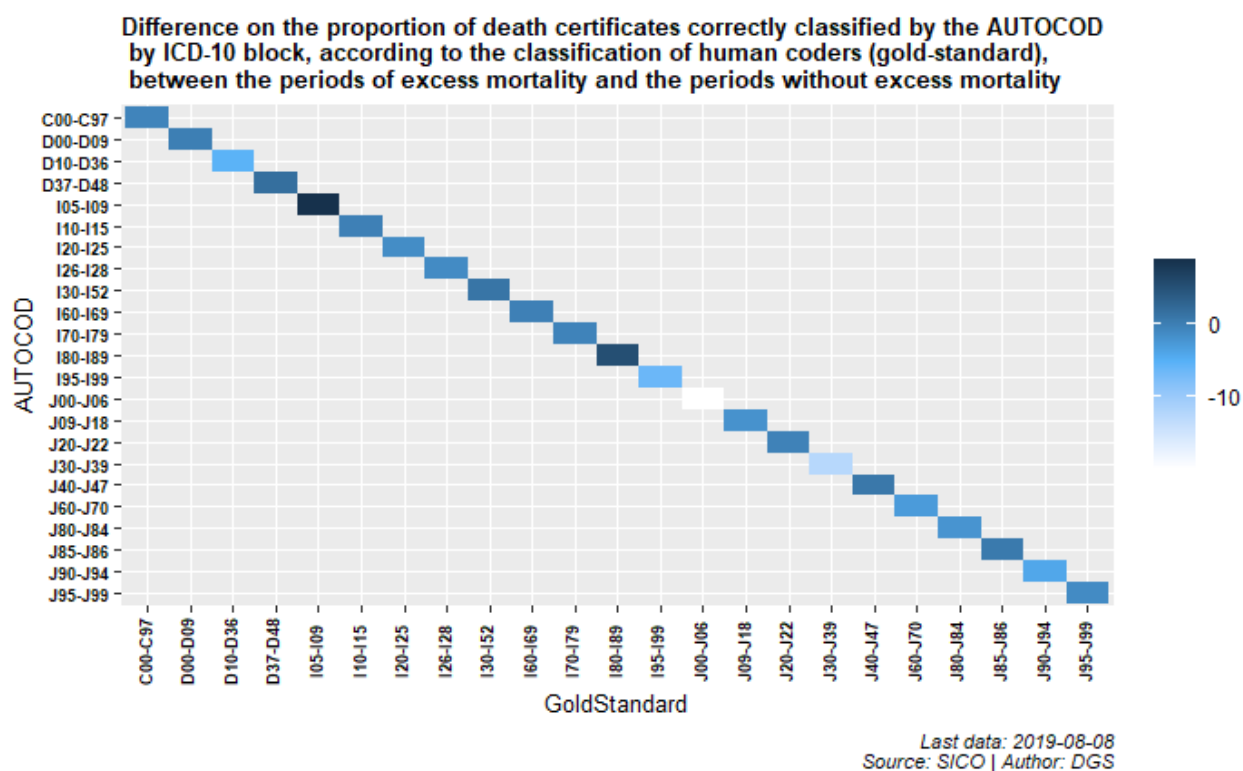

Supplementary Figure 32 - Difference on the proportion of death certificates correctly classified by the AUTOCOD by ICD-10 block, according to the classification of human coders (gold-standard), between the periods of excess mortality and the periods without excess mortality

Caption: C00-C97 - Malignant neoplasms; D00-D09 - In situ neoplasms; D10-D36 - Benign neoplasms; D37-D48 - Neoplasms of uncertain or unknown behaviour; I05-I09 - Chronic rheumatic heart diseases; I10-I15 - Hypertensive diseases; I20-I25 - Ischaemic heart diseases; I26-I28 - Pulmonary heart disease and diseases of pulmonary circulation; I30-I52 - Other forms of heart disease; I60-I69 - Cerebrovascular diseases; I70-I79 - Diseases of arteries, arterioles and capillaries; I80-I89 - Diseases of veins, lymphatic vessels and lymph nodes, not elsewhere classified; I95-I99 - Other and unspecified disorders of the circulatory system; J00-J06 - Acute upper respiratory infections; J09-J18 - Influenza and pneumonia; J20-J22 - Other acute lower respiratory infections; J30-J39 - Other diseases of upper respiratory tract; J40-J47 - Chronic lower respiratory diseases; J60-J70 - Lung diseases due to external agents; J80-J84 - Other respiratory diseases principally affecting the interstitium; J85-J86 - Suppurative and necrotic conditions of lower respiratory tract; J90-J94 - Other diseases of pleura; J95-J99 - Other diseases of the respiratory system

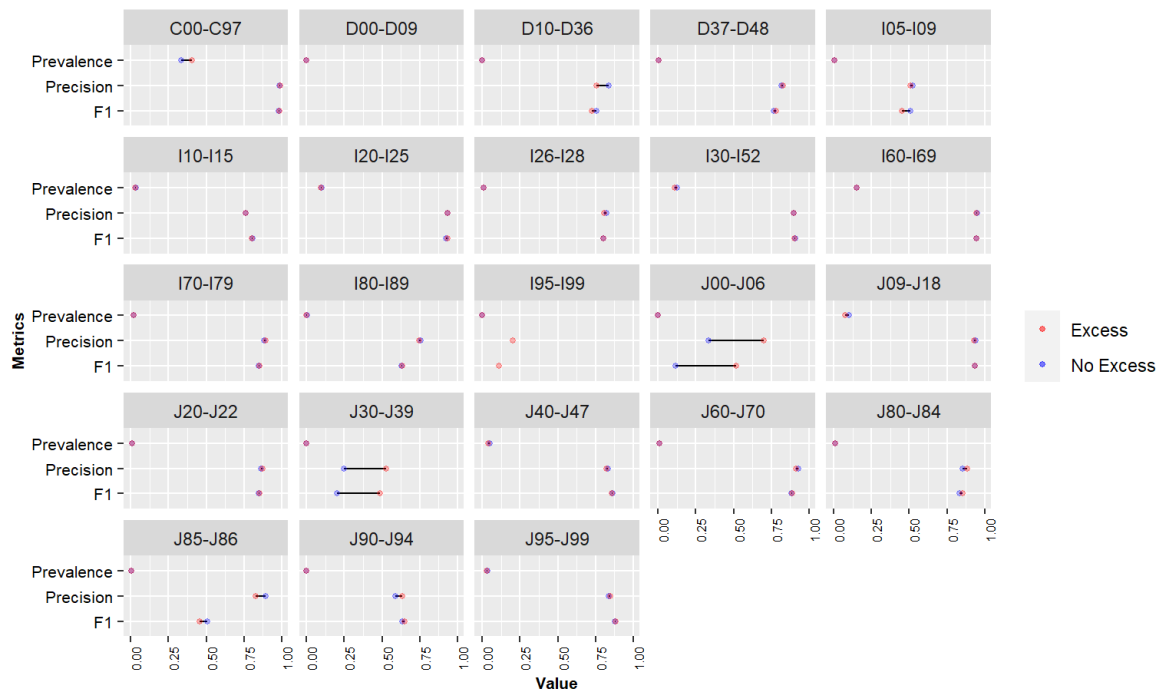

Supplementary Figure 33 - Comparison between other performance metrics of AUTOCOD during periods of excess mortality and periods without excess mortality, by ICD-10 block

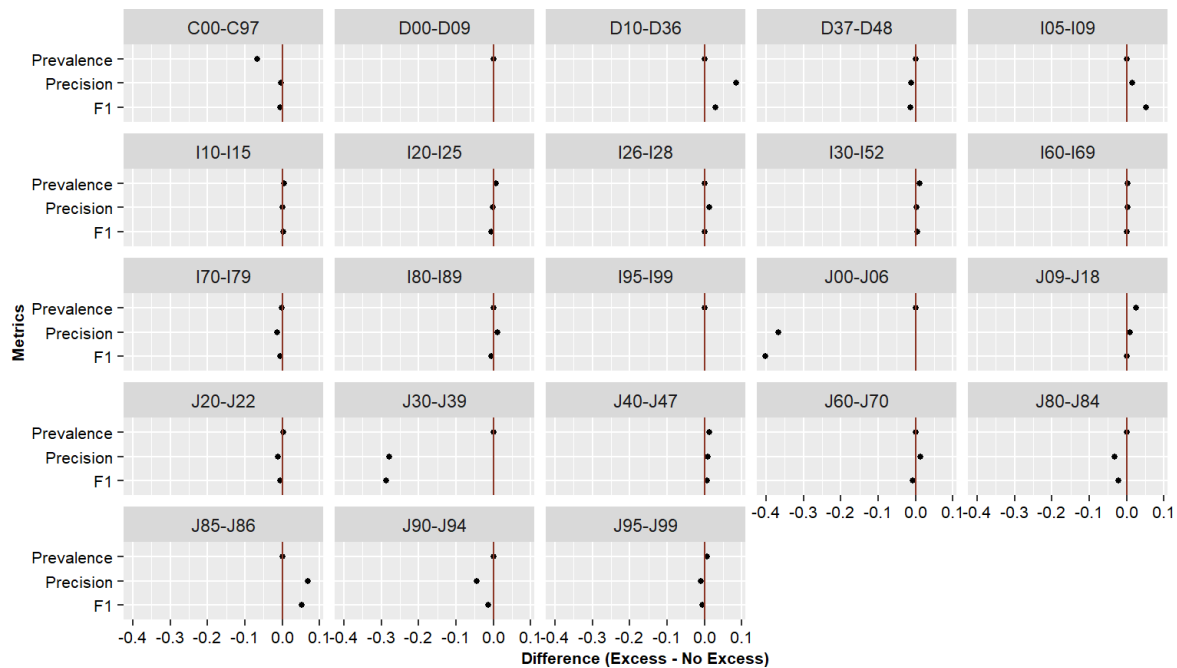

Supplementary Figure 34 - Difference on other performance metrics of AUTOCOD, by block, between periods of Excess Mortality and periods without excess mortality

Caption: C00-C97 - Malignant neoplasms; D00-D09 - In situ neoplasms; D10-D36 - Benign neoplasms; D37-D48 - Neoplasms of uncertain or unknown behaviour; I05-I09 - Chronic rheumatic heart diseases; I10-I15 - Hypertensive diseases; I20-I25 - Ischaemic heart diseases; I26-I28 - Pulmonary heart disease and diseases of pulmonary circulation; I30-I52 - Other forms of heart disease; I60-I69 - Cerebrovascular diseases; I70-I79 - Diseases of arteries, arterioles and capillaries; I80-I89 - Diseases of veins, lymphatic vessels and lymph nodes, not elsewhere classified; I95-I99 - Other and unspecified disorders of the circulatory system; J00-J06 - Acute upper respiratory infections; J09-J18 - Influenza and pneumonia; J20-J22 - Other acute lower respiratory infections; J30-J39 - Other diseases of upper respiratory tract; J40-J47 - Chronic lower respiratory diseases; J60-J70 - Lung diseases due to external agents; J80-J84 - Other respiratory diseases principally affecting the interstitium; J85-J86 - Suppurative and necrotic conditions of lower respiratory tract; J90-J94 - Other diseases of pleura; J95-J99 - Other diseases of the respiratory system

**Difference on the proportion of death certificates correctly classified by the AUTOCOD by ICD-10 block, according to the classification of human coders (gold-standard) between the periods of severe excess mortality (> 4SD) and the periods without excess mortality**

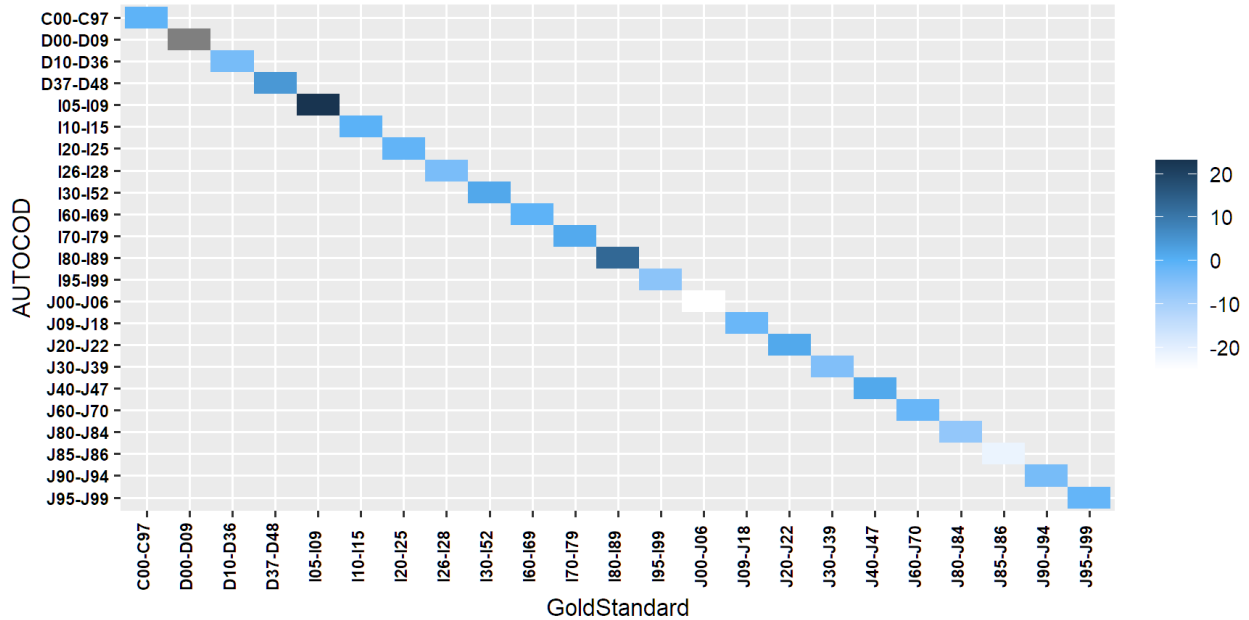

Last data: 2019-08-08  
Source: SICO | Author: DGS

Supplementary Figure 35 - Difference on the proportion of death certificates correctly classified by the AUTOCOD by ICD-10 block, according to the classification of human coders (gold-standard), between the periods of extreme excess mortality (>4 SDs) and the periods without excess mortality

Caption: C00-C97 - Malignant neoplasms; D00-D09 - In situ neoplasms; D10-D36 - Benign neoplasms; D37-D48 - Neoplasms of uncertain or unknown behaviour; I05-I09 - Chronic rheumatic heart diseases; I10-I15 - Hypertensive diseases; I20-I25 - Ischaemic heart diseases; I26-I28 - Pulmonary heart disease and diseases of pulmonary circulation; I30-I52 - Other forms of heart disease; I60-I69 - Cerebrovascular diseases; I70-I79 - Diseases of arteries, arterioles and capillaries; I80-I89 - Diseases of veins, lymphatic vessels and lymph nodes, not elsewhere classified; I95-I99 - Other and unspecified disorders of the circulatory system; J00-J06 - Acute upper respiratory infections; J09-J18 - Influenza and pneumonia; J20-J22 - Other acute lower respiratory infections; J30-J39 - Other diseases of upper respiratory tract; J40-J47 - Chronic lower respiratory diseases; J60-J70 - Lung diseases due to external agents; J80-J84 - Other respiratory diseases principally affecting the interstitium; J85-J86 - Suppurative and necrotic conditions of lower respiratory tract; J90-J94 - Other diseases of pleura; J95-J99 - Other diseases of the respiratory system

**Metrics difference between periods of severe excess mortality >4 SD and periods without excess mortality by Block**

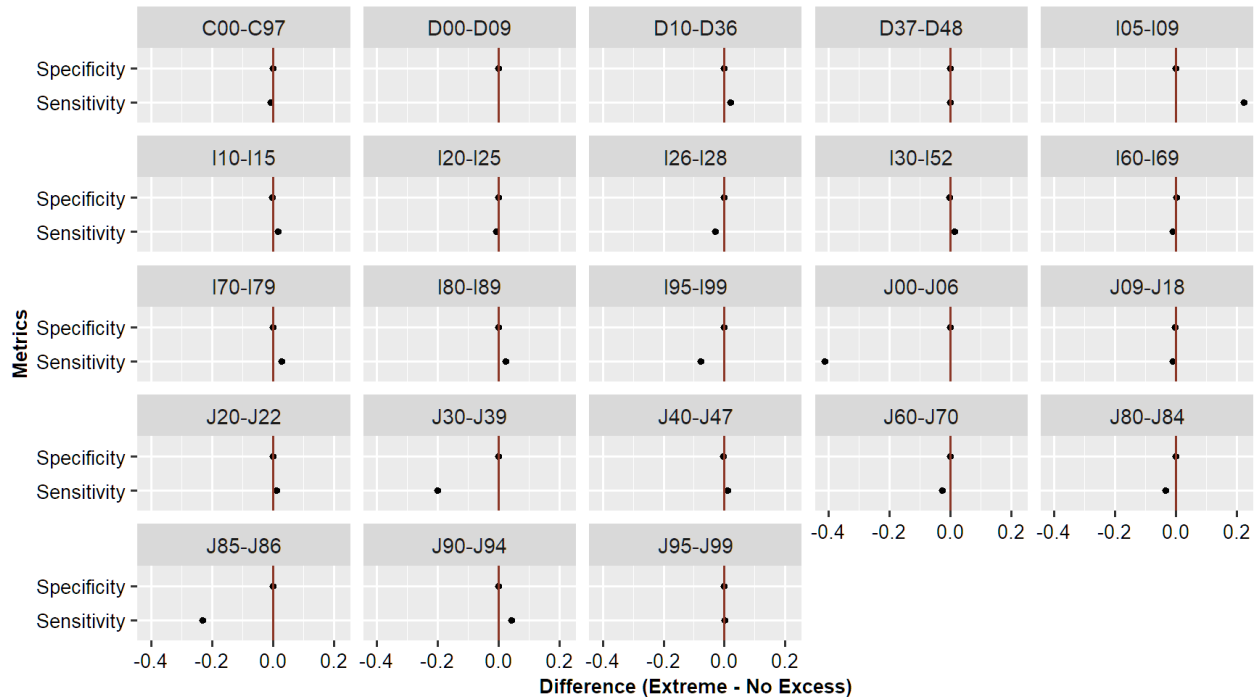

Supplementary Figure 36 - Difference on other performance metrics of AUTOCOD, by block, between periods of severe excess mortality (>4 SDs) and periods without excess mortality

Caption: C00-C97 - Malignant neoplasms; D00-D09 - In situ neoplasms; D10-D36 - Benign neoplasms; D37-D48 - Neoplasms of uncertain or unknown behaviour; I05-I09 - Chronic rheumatic heart diseases; I10-I15 - Hypertensive diseases; I20-I25 - Ischaemic heart diseases; I26-I28 - Pulmonary heart disease and diseases of pulmonary circulation; I30-I52 - Other forms of heart disease; I60-I69 - Cerebrovascular diseases; I70-I79 - Diseases of arteries, arterioles and capillaries; I80-I89 - Diseases of veins, lymphatic vessels and lymph nodes, not elsewhere classified; I95-I99 - Other and unspecified disorders of the circulatory system; J00-J06 - Acute upper respiratory infections; J09-J18 - Influenza and pneumonia; J20-J22 - Other acute lower respiratory infections; J30-J39 - Other diseases of upper respiratory tract; J40-J47 - Chronic lower respiratory diseases; J60-J70 - Lung diseases due to external agents; J80-J84 - Other respiratory diseases principally affecting the interstitium; J85-J86 - Suppurative and necrotic conditions of lower respiratory tract; J90-J94 - Other diseases of pleura; J95-J99 - Other diseases of the respiratory system



**Metrics difference between periods of severe excess mortality >4 SD and periods without excess mortality by block**

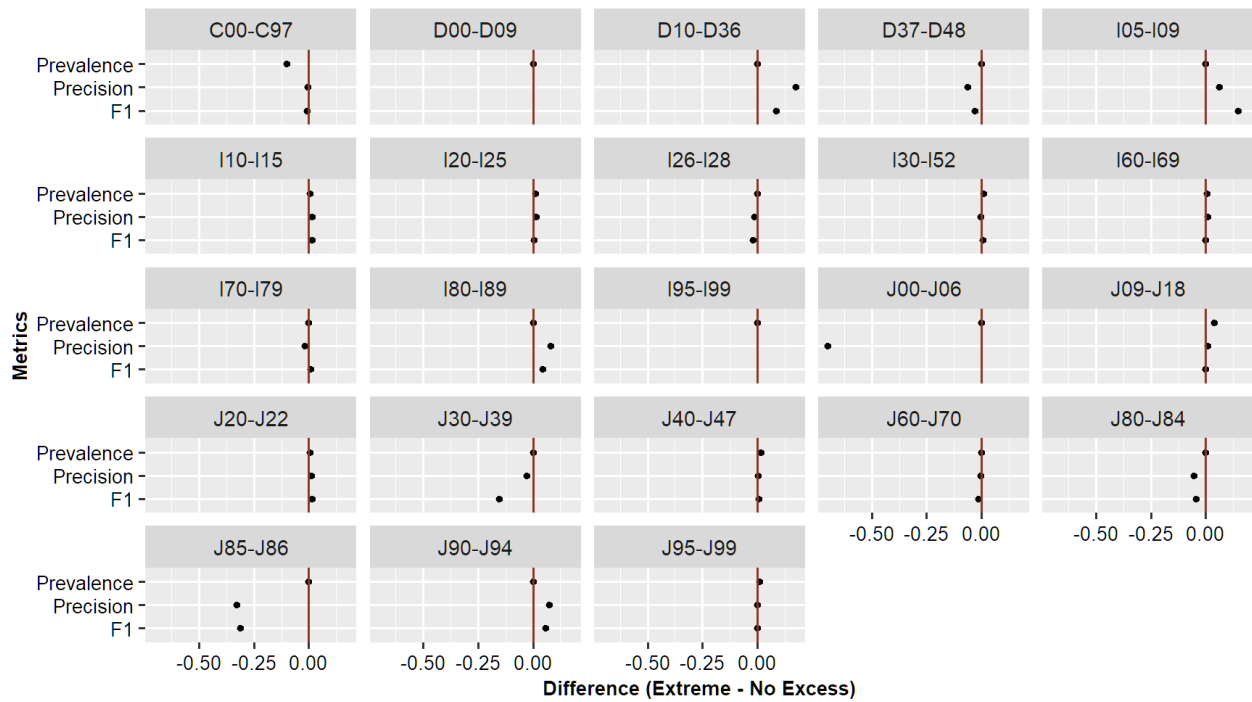

Supplementary Figure 37 - Difference on other performance metrics of AUTOCOD, by block, between periods of severe excess mortality (>4 SDs) and periods without excess mortality

**Difference on the proportion of death certificates correctly classified by the AUTOCOD by ICD-10 block, according to the classification of human coders (gold-standard), between the periods of extreme excess mortality (>6 SD) and the periods without excess mortality**

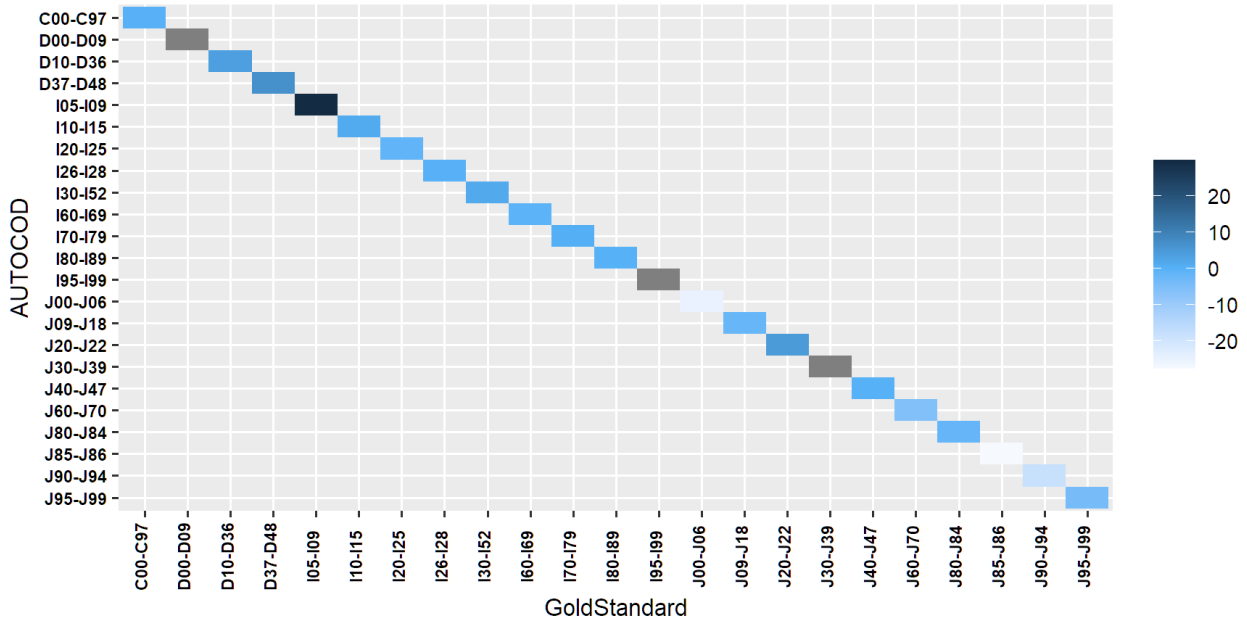

Last data: 2019-08-08  
Source: SICO | Author: DGS

Supplementary Figure 38 - Difference on the proportion of death certificates correctly classified by the AUTOCOD by ICD-10 block, according to the classification of human coders (gold-standard), between the periods of extreme excess mortality (>6 SDs) and the periods without excess mortality

Caption: C00-C97 - Malignant neoplasms; D00-D09 - In situ neoplasms; D10-D36 - Benign neoplasms; D37-D48 - Neoplasms of uncertain or unknown behaviour; I05-I09 - Chronic rheumatic heart diseases; I10-I15 - Hypertensive diseases; I20-I25 - Ischaemic heart diseases; I26-I28 - Pulmonary heart disease and diseases of pulmonary circulation; I30-I52 - Other forms of heart disease; I60-I69 - Cerebrovascular diseases; I70-I79 - Diseases of arteries, arterioles and capillaries; I80-I89 - Diseases of veins, lymphatic vessels and lymph nodes, not elsewhere classified; I95-I99 - Other and unspecified disorders of the circulatory system; J00-J06 - Acute upper respiratory infections; J09-J18 - Influenza and pneumonia; J20-J22 - Other acute lower respiratory infections; J30-J39 - Other diseases of upper respiratory tract; J40-J47 - Chronic lower respiratory diseases; J60-J70 - Lung diseases due to external agents; J80-J84 - Other respiratory diseases principally affecting the interstitium; J85-J86 - Suppurative and necrotic conditions of lower respiratory tract; J90-J94 - Other diseases of pleura; J95-J99 - Other diseases of the respiratory system
